# Supplementary material
Source: Frontiers journal article supplement (https://www.frontiersin.org/articles/516906)
Supplement: Table_2.XLS [file Table_2.XLS]

## Sheet: Table2_Phagocytes transcriptomi
Supplementary table 2. Comparing DEGs between phagocytes and non-phagocytes.
GeneID	geneLength	Means-Non_Phagocyte	Means-Phagocyte	log2Ratio(Phagocyte/Non_Phagocyte)	Up-Down-Regulation(Phagocyte/Non_Phagocyte)	Probability	KEGG Orthology	GO Component	GO Function	GO Process	Blast nr
Unigene0017311	1834	20.7133	446.503	4.43004	Up	0.946877	-	-	-	-	gi|762091673|ref|XP_011428242.1|/0/PREDICTED: uncharacterized protein LOC105328902 [Crassostrea gigas]
Unigene0016097	2235	398.607	8020.66	4.33068	Up	0.94617	K06238|1|2e-74|283|crg:105329078|collagen, type VI, alpha	-	-	-	gi|405966044|gb|EKC31369.1|/0/Collagen alpha-1(XII) chain [Crassostrea gigas]
Unigene0013542	6849	11.7567	234.183	4.31609	Up	0.943426	K06237|1|0.0|2438|crg:105329214|collagen, type IV, alpha	-	-	GO:0044699	gi|762092546|ref|XP_011428706.1|/0/PREDICTED: collagen alpha-2(IV) chain-like [Crassostrea gigas]
Unigene0013553	6592	7.65	158.603	4.37382	Up	0.941503	K06237|1|0.0|1131|crg:105329196|collagen, type IV, alpha	-	-	-	gi|762092498|ref|XP_011428680.1|/0/PREDICTED: collagen alpha-1(IV) chain-like isoform X1 [Crassostrea gigas]
Unigene0025266	773	18.5967	341.69	4.19957	Up	0.941294	K06483|1|1e-135|484|crg:105342976|integrin alpha 4;K06584|2|2e-55|217|crg:105348912|integrin alpha 8	-	-	-	gi|762130548|ref|XP_011448411.1|/1.0149e-134/PREDICTED: integrin alpha-4-like [Crassostrea gigas]
Unigene0002246	1076	13.65	249.607	4.19268	Up	0.940345	K18080|1|0.0|725|crg:105317919|tensin	-	-	-	gi|762150162|ref|XP_011413034.1|/0/PREDICTED: formin-J-like [Crassostrea gigas]
Unigene0014144	3786	5.41667	112.283	4.37359	Up	0.939027	K07377|1|0.0|1030|crg:105330618|neurexin	-	-	-	gi|762096428|ref|XP_011430745.1|/0/PREDICTED: uncharacterized protein LOC105330618 isoform X10 [Crassostrea gigas]
Unigene0015357	2589	39.1033	634.82	4.02098	Up	0.938272	K19519|1|0.0|1236|crg:105322271|transforming growth factor-beta-induced protein	-	-	-	gi|762161934|ref|XP_011419215.1|/0/PREDICTED: transforming growth factor-beta-induced protein ig-h3-like [Crassostrea gigas]
Unigene0009599	994	11.3233	202.71	4.16205	Up	0.937661	K07377|1|2e-175|617|crg:105330618|neurexin	-	-	-	gi|762096416|ref|XP_011430738.1|/9.98415e-177/PREDICTED: uncharacterized protein LOC105330618 isoform X4 [Crassostrea gigas]
Unigene0006976	2122	11.7333	202.397	4.1085	Up	0.937516	K09624|1|0.0|583|crg:105340743|neurotrypsin [EC:3.4.21.-]	-	-	-	gi|762124434|ref|XP_011445228.1|/0/PREDICTED: uncharacterized protein LOC105340743 isoform X1 [Crassostrea gigas]
Unigene0019007	1469	21.2667	343.47	4.01352	Up	0.937318	K05449|1|1e-139|498|crg:105343926|vascular endothelial growth factor C/D	-	-	-	gi|405950742|gb|EKC18709.1|/1.13585e-138/Vascular endothelial growth factor D [Crassostrea gigas]
Unigene0009598	1437	7.69	138.427	4.16999	Up	0.937216	K07377|1|0.0|893|crg:105330618|neurexin	-	-	-	gi|762096428|ref|XP_011430745.1|/0/PREDICTED: uncharacterized protein LOC105330618 isoform X10 [Crassostrea gigas]
Unigene0014141	3792	14.6667	237.473	4.01715	Up	0.936193	K07377|1|0.0|2273|crg:105330618|neurexin	-	-	-	gi|762096414|ref|XP_011430736.1|/0/PREDICTED: uncharacterized protein LOC105330618 isoform X3 [Crassostrea gigas]
Unigene0015468	2538	29.27	445.88	3.92916	Up	0.936026	K04462|1|3e-148|528|crg:105330257|ecotropic virus integration site 1 protein	-	-	-	gi|405951506|gb|EKC19413.1|/0/Ecotropic virus integration site 1-like protein [Crassostrea gigas]
Unigene0006977	1855	22.3367	338.21	3.92043	Up	0.935469	K09624|1|0.0|859|crg:105340743|neurotrypsin [EC:3.4.21.-]	-	-	-	gi|762124436|ref|XP_011445229.1|/0/PREDICTED: uncharacterized protein LOC105340743 isoform X2 [Crassostrea gigas]
Unigene0014156	3779	107.673	1584.77	3.87954	Up	0.935035	K12349|1|9e-35|152|smm:Smp_147460|neutral ceramidase [EC:3.5.1.23];K12589|2|1e-17|95.5|dse:Dsec_GM21652|exosome complex component RRP42	-	-	-	gi|762151586|ref|XP_011413780.1|/0/PREDICTED: putative ferric-chelate reductase 1 [Crassostrea gigas]
Unigene0010509	1062	15.5367	241.02	3.9554	Up	0.934542	K16353|1|2e-10|68.9|crg:105342949|protein sidekick;K11499|2|2e-09|65.5|dre:497403|centromere protein F;K10352|3|7e-09|63.9|gfr:102044062|myosin heavy chain;K16469|4|1e-08|63.2|xma:102229182|rootletin;K16731|5|2e-08|62.8|bmor:101747130|golgin subfamily A member 1	-	-	-	gi|762100211|ref|XP_011432555.1|/3.13241e-155/PREDICTED: uncharacterized protein LOC105331882 [Crassostrea gigas]
Unigene0031900	828	39.8767	575.093	3.85018	Up	0.934435	K18080|1|3e-137|489|crg:105317919|tensin	-	-	-	gi|762150162|ref|XP_011413034.1|/2.11042e-136/PREDICTED: formin-J-like [Crassostrea gigas]
Unigene0002245	612	40.4833	568.84	3.81262	Up	0.934221	K18080|1|2e-83|310|crg:105317919|tensin	-	-	-	gi|762150162|ref|XP_011413034.1|/1.52771e-82/PREDICTED: formin-J-like [Crassostrea gigas]
Unigene0011046	545	29.54	439	3.89348	Up	0.934205	K09377|1|2e-75|283|crg:105337742|cysteine and glycine-rich protein	-	GO:0008270//zinc ion binding	-	gi|405974805|gb|EKC39424.1|/7.70163e-76/Muscle LIM protein Mlp84B [Crassostrea gigas]
Unigene0002247	272	0.73	29.21	5.32242	Up	0.93398	-	-	-	-	-
Unigene0007981	4062	8.65667	139.473	4.01003	Up	0.933299	K10350|1|2e-10|71.2|pxy:105388985|Zyg-11 protein homolog	-	-	-	gi|762158631|ref|XP_011417501.1|/0/PREDICTED: ankyrin repeat and fibronectin type-III domain-containing protein 1-like isoform X3 [Crassostrea gigas]
Unigene0011044	476	74.1667	997.263	3.74913	Up	0.93279	-	-	-	-	-
Unigene0024709	818	15.8467	234.427	3.88689	Up	0.932501	K06724|1|2e-12|75.5|mze:101476583|neuropilin 1	-	-	-	gi|762161752|ref|XP_011419115.1|/1.60362e-120/PREDICTED: MAM and LDL-receptor class A domain-containing protein 1-like [Crassostrea gigas]
Unigene0021556	1115	36.7667	487.04	3.72757	Up	0.932067	K19867|1|8e-14|80.5|crg:105335510|LIM domain-binding protein 3	-	-	-	gi|762147927|ref|XP_011411887.1|/1.56242e-75/PREDICTED: PDZ and LIM domain protein Zasp-like isoform X2 [Crassostrea gigas]
Unigene0017409	1808	13.5933	197.697	3.86232	Up	0.9316	K17353|1|7e-35|151|crg:105342060|tetraspanin-18;K06537|4|2e-20|103|crg:105339179|CD151 antigen;K17352|5|4e-20|102|lgi:LOTGIDRAFT_157798|tetraspanin-11	-	-	-	gi|762128111|ref|XP_011447150.1|/6.04597e-39/PREDICTED: tetraspanin-18-like isoform X2 [Crassostrea gigas]
Unigene0017708	1734	22.3867	310.397	3.7934	Up	0.931472	K06483|1|0.0|800|crg:105342976|integrin alpha 4;K06584|2|1e-63|246|crg:105348912|integrin alpha 8;K06524|4|1e-08|64.3|mcc:721483|integrin alpha E	-	-	-	gi|762130548|ref|XP_011448411.1|/0/PREDICTED: integrin alpha-4-like [Crassostrea gigas]
Unigene0002244	2386	52.2133	654.783	3.64853	Up	0.930207	K18080|1|0.0|681|crg:105317919|tensin	-	-	-	gi|762150162|ref|XP_011413034.1|/0/PREDICTED: formin-J-like [Crassostrea gigas]
Unigene0022427	1021	40.7633	522.997	3.68146	Up	0.930116	-	GO:0005892//acetylcholine-gated channel complex	-	-	gi|762078998|ref|XP_011456903.1|/5.28825e-112/PREDICTED: uncharacterized protein LOC105348974 [Crassostrea gigas]
Unigene0017033	1912	18.1133	235.32	3.6995	Up	0.930057	K07377|1|0.0|880|crg:105330618|neurexin;K14963|3|1e-47|194|lgi:LOTGIDRAFT_77818|COMPASS component SWD3;K14555|4|6e-15|85.1|dmo:Dmoj_GI18830|U3 small nucleolar RNA-associated protein 13	-	-	-	gi|762096426|ref|XP_011430744.1|/0/PREDICTED: uncharacterized protein LOC105330618 isoform X9 [Crassostrea gigas]
Unigene0018725	1521	15.2133	204.753	3.75048	Up	0.929773	K06772|1|4e-46|188|crg:105346296|limbic system-associated membrane protein;K06773|3|3e-13|79.0|lgi:LOTGIDRAFT_120413|opioid binding protein/cell adhesion molecule-like;K06756|4|4e-11|72.0|isc:IscW_ISCW020054|neuronal cell adhesion molecule;K17341|5|7e-11|71.2|xtr:100135378|hemicentin	-	-	-	gi|762129074|ref|XP_011447655.1|/6.95985e-163/PREDICTED: neural cell adhesion molecule 1-like [Crassostrea gigas]
Unigene0025555	751	9.02333	126.627	3.81078	Up	0.928669	-	-	-	-	gi|762161752|ref|XP_011419115.1|/4.16279e-45/PREDICTED: MAM and LDL-receptor class A domain-containing protein 1-like [Crassostrea gigas]
Unigene0018601	1544	20.4867	256.397	3.64562	Up	0.928359	K08784|1|1e-15|87.0|lcm:102361645|HtrA serine peptidase 1 [EC:3.4.21.-];K08785|2|6e-15|84.7|shr:100925465|HtrA serine peptidase 3 [EC:3.4.21.-]	-	-	-	gi|405967259|gb|EKC32441.1|/3.88094e-153/Kazal-type serine protease inhibitor domain-containing protein 1 [Crassostrea gigas]
Unigene0002432	722	12.15	160.417	3.7228	Up	0.928209	K06824|1|5e-16|86.7|cmk:103188749|nephronectin	-	-	-	gi|762169175|ref|XP_011422986.1|/2.84368e-109/PREDICTED: epidermal growth factor-like protein 8 [Crassostrea gigas]
Unigene0004998	3946	37.19	440.663	3.56669	Up	0.927732	K06825|1|6e-11|73.2|bfo:BRAFLDRAFT_118405|fibrillin 1;K18032|3|9e-09|65.9|crg:105333895|receptor-type tyrosine-protein phosphatase A [EC:3.1.3.48];K06247|4|3e-08|64.3|dre:558958|laminin, gamma 3;K05637|5|3e-08|64.3|mcf:102145776|laminin, alpha 1/2	-	-	-	gi|762144065|ref|XP_011455295.1|/0/PREDICTED: LOW QUALITY PROTEIN: uncharacterized protein LOC105347787 [Crassostrea gigas]
Unigene0008757	1894	17.2467	217.003	3.65333	Up	0.927689	K19015|1|1e-99|366|ocu:100009345|inter-alpha-trypsin inhibitor heavy chain H2	-	-	-	gi|762158969|ref|XP_011417684.1|/0/PREDICTED: inter-alpha-trypsin inhibitor heavy chain H4-like [Crassostrea gigas]
Unigene0027230	640	31.0567	362.187	3.54376	Up	0.927137	-	-	-	-	gi|762152959|ref|XP_011414500.1|/2.73778e-56/PREDICTED: uncharacterized protein LOC105318886 [Crassostrea gigas]
Unigene0014403	3433	4.46333	72.0233	4.01227	Up	0.926472	K17341|1|2e-102|376|hgl:101698188|hemicentin	-	-	-	gi|762135209|ref|XP_011450849.1|/0/PREDICTED: SCO-spondin-like [Crassostrea gigas]
Unigene0011045	789	12.5133	160.113	3.67756	Up	0.926151	-	-	-	-	-
Unigene0012351	586	154.473	1638.48	3.40693	Up	0.926065	-	-	-	-	gi|762134765|ref|XP_011450616.1|/2.28598e-53/PREDICTED: uncharacterized protein LOC105344530 [Crassostrea gigas]
Unigene0022773	965	6.70333	94.5467	3.81808	Up	0.92599	K17341|1|2e-91|246|hgl:101698188|hemicentin	-	-	-	gi|762169523|ref|XP_011423170.1|/0/PREDICTED: SCO-spondin-like [Crassostrea gigas]
Unigene0012350	575	267.6	2768.95	3.37119	Up	0.925904	-	-	-	-	gi|762134765|ref|XP_011450616.1|/2.13608e-53/PREDICTED: uncharacterized protein LOC105344530 [Crassostrea gigas]
Unigene0006978	967	12.1633	153.613	3.65869	Up	0.925824	K09624|1|9e-122|438|crg:105340743|neurotrypsin [EC:3.4.21.-]	-	GO:0003824//catalytic activity	-	gi|762124436|ref|XP_011445229.1|/7.35862e-121/PREDICTED: uncharacterized protein LOC105340743 isoform X2 [Crassostrea gigas]
Unigene0004997	2951	48.2633	525.87	3.44571	Up	0.925744	K12236|1|6e-08|62.8|cbr:CBG19688|transcriptional repressor NF-X1;K05637|3|2e-06|57.8|phi:102105406|laminin, alpha 1/2;K06252|5|5e-06|56.2|chx:102179198|tenascin	-	-	-	gi|762144065|ref|XP_011455295.1|/0/PREDICTED: LOW QUALITY PROTEIN: uncharacterized protein LOC105347787 [Crassostrea gigas]
Unigene0020665	1220	178.69	1811.79	3.34189	Up	0.925572	K03909|1|3e-07|58.9|cge:100760115|tissue factor pathway inhibitor	-	-	-	gi|405972638|gb|EKC37398.1|/9.6223e-146/Protein AMBP [Crassostrea gigas]
Unigene0017101	1890	46.45	495.47	3.41505	Up	0.925363	K16686|1|5e-83|311|crg:105338884|scaffold protein salvador	-	-	-	gi|405972804|gb|EKC37552.1|/4.2176e-99/salvador-like protein 1 [Crassostrea gigas]
Unigene0008758	209	5.69333	84.5967	3.89326	Up	0.924919	-	-	-	-	-
Unigene0000862	209	7.39	100.023	3.75862	Up	0.924661	-	-	-	-	-
Unigene0014072	3941	25.83	273.72	3.40558	Up	0.923981	K05726|1|0.0|1655|crg:105329588|breast cancer anti-estrogen resistance 1	-	-	-	gi|762093460|ref|XP_011429184.1|/0/PREDICTED: enhancer of filamentation 1-like isoform X4 [Crassostrea gigas]
Unigene0008756	1352	28.9867	291.813	3.33158	Up	0.923558	-	-	-	-	gi|762158969|ref|XP_011417684.1|/7.59832e-94/PREDICTED: inter-alpha-trypsin inhibitor heavy chain H4-like [Crassostrea gigas]
Unigene0023036	959	57.1467	549.89	3.2664	Up	0.922657	K16866|1|2e-118|427|crg:105323677|metalloproteinase inhibitor 3	GO:0005576//extracellular region	GO:0008191//metalloendopeptidase inhibitor activity;GO:0004866//endopeptidase inhibitor activity	GO:0010951//negative regulation of endopeptidase activity	gi|765826387|ref|NP_001292268.1|/1.28441e-117/metalloproteinase inhibitor 3-like precursor [Crassostrea gigas]
Unigene0004403	699	50.9833	487.183	3.25637	Up	0.922325	-	-	-	-	-
Unigene0030941	330	38.1867	368.18	3.26927	Up	0.92195	-	-	-	-	gi|762102543|ref|XP_011433768.1|/1.7354e-47/PREDICTED: uncharacterized protein LOC105332769 [Crassostrea gigas]
Unigene0014077	3930	11.82	125.917	3.41317	Up	0.919758	K03132|1|2e-53|214|tsp:Tsp_01015|transcription initiation factor TFIID subunit 7	GO:0016020//membrane;GO:0030054//cell junction	-	GO:0006810//transport	gi|762160329|ref|XP_011418378.1|/0/PREDICTED: innexin unc-9-like isoform X2 [Crassostrea gigas]
Unigene0000542	2038	57.27	490.873	3.0995	Up	0.918826	K04437|1|0.0|1330|crg:105348068|filamin	-	-	-	gi|762144812|ref|XP_011455674.1|/0/PREDICTED: filamin-A-like isoform X16 [Crassostrea gigas]
Unigene0000860	1101	7.23667	86.1467	3.5734	Up	0.918521	K06255|1|0.0|742|crg:105328642|heparan sulfate proteoglycan 2 (perlecan)	-	-	-	gi|762091053|ref|XP_011427913.1|/0/PREDICTED: basement membrane-specific heparan sulfate proteoglycan core protein-like isoform X7 [Crassostrea gigas]
Unigene0002197	298	1.96333	37.77	4.26586	Up	0.918338	K06255|1|4e-48|191|crg:105328642|heparan sulfate proteoglycan 2 (perlecan)	-	-	-	gi|762091053|ref|XP_011427913.1|/3.95494e-47/PREDICTED: basement membrane-specific heparan sulfate proteoglycan core protein-like isoform X7 [Crassostrea gigas]
Unigene0015474	2531	38.7333	337.217	3.12203	Up	0.918306	-	-	-	-	gi|762121036|ref|XP_011443433.1|/6.04612e-83/PREDICTED: uncharacterized protein LOC105339553 [Crassostrea gigas]
Unigene0027458	624	10.5633	108.803	3.36459	Up	0.91799	-	-	-	-	gi|405970941|gb|EKC35803.1|/5.92857e-24/hypothetical protein CGI_10011199 [Crassostrea gigas]
Unigene0000861	5585	8.33667	90.1667	3.43505	Up	0.916635	K06255|1|0.0|3416|crg:105328642|heparan sulfate proteoglycan 2 (perlecan)	-	-	-	gi|762091053|ref|XP_011427913.1|/0/PREDICTED: basement membrane-specific heparan sulfate proteoglycan core protein-like isoform X7 [Crassostrea gigas]
Unigene0025121	783	11.2533	110.337	3.29349	Up	0.915734	-	-	-	-	-
Unigene0015025	2811	20.9967	180.923	3.10715	Up	0.915638	K17307|1|2e-176|622|lgi:LOTGIDRAFT_235911|fibulin 1/2	-	-	-	gi|762094528|ref|XP_011429747.1|/0/PREDICTED: fibulin-2-like [Crassostrea gigas]
Unigene0011377	651	422.333	3226.05	2.93331	Up	0.915552	-	-	-	-	gi|762085657|ref|XP_011425146.1|/7.06544e-71/PREDICTED: mitotic apparatus protein p62-like [Crassostrea gigas]
Unigene0004151	538	360.167	2710.32	2.91172	Up	0.915241	-	GO:0005576//extracellular region	GO:0005179//hormone activity	-	gi|762163602|ref|XP_011420093.1|/1.67265e-19/PREDICTED: uncharacterized protein LOC105322889 [Crassostrea gigas]
Unigene0011375	223	391.83	2916.91	2.89614	Up	0.915097	-	-	-	-	-
Unigene0004152	320	2127.23	15571	2.87181	Up	0.914732	-	GO:0005576//extracellular region	GO:0005179//hormone activity	-	gi|762163602|ref|XP_011420093.1|/2.60505e-51/PREDICTED: uncharacterized protein LOC105322889 [Crassostrea gigas]
Unigene0004488	410	125.973	930.927	2.88555	Up	0.914609	-	-	-	-	gi|762095153|ref|XP_011430077.1|/1.93766e-38/PREDICTED: uncharacterized protein LOC105330179 [Crassostrea gigas]
Unigene0032201	513	586.41	4244.82	2.85572	Up	0.91447	-	GO:0005576//extracellular region	GO:0005179//hormone activity	-	gi|762163602|ref|XP_011420093.1|/4.71831e-39/PREDICTED: uncharacterized protein LOC105322889 [Crassostrea gigas]
Unigene0009840	560	470.843	3412.66	2.85758	Up	0.914464	K07763|1|1e-92|340|crg:105338896|matrix metalloproteinase-14 (membrane-inserted) [EC:3.4.24.80];K08003|5|4e-18|92.8|hro:HELRODRAFT_194076|matrix metalloproteinase-25 (membrane-inserted) [EC:3.4.24.-]	-	-	-	gi|762119183|ref|XP_011442491.1|/8.27014e-92/PREDICTED: stromelysin-3-like [Crassostrea gigas]
Unigene0009839	630	101.113	743.54	2.87844	Up	0.914314	K07763|1|3e-18|94.0|crg:105338896|matrix metalloproteinase-14 (membrane-inserted) [EC:3.4.24.80];K01394|3|8e-07|55.8|mdo:100011059|matrix metalloproteinase-3 (stromelysin 1, progelatinase) [EC:3.4.24.17]	-	-	-	gi|762119183|ref|XP_011442491.1|/1.87254e-17/PREDICTED: stromelysin-3-like [Crassostrea gigas]
Unigene0007669	258	505.887	3653	2.85219	Up	0.914298	K06233|1|8e-20|97.4|xma:102224920|low density lipoprotein-related protein 2	-	-	-	gi|405977564|gb|EKC42007.1|/2.38431e-44/Low-density lipoprotein receptor [Crassostrea gigas]
Unigene0000859	1138	8.07	80.6567	3.32115	Up	0.91417	K06255|1|0.0|649|crg:105328642|heparan sulfate proteoglycan 2 (perlecan)	-	-	-	gi|762091053|ref|XP_011427913.1|/0/PREDICTED: basement membrane-specific heparan sulfate proteoglycan core protein-like isoform X7 [Crassostrea gigas]
Unigene0010197	1139	9.09667	87.6067	3.26763	Up	0.913082	K16353|1|1e-31|139|crg:105342949|protein sidekick;K03988|2|6e-06|54.3|rno:362634|complement C1q subcomponent subunit C	-	-	-	gi|405970908|gb|EKC35771.1|/2.73349e-124/Methionyl-tRNA synthetase, mitochondrial [Crassostrea gigas]
Unigene0000541	1298	67.4333	480.663	2.83349	Up	0.91291	K04437|1|0.0|873|crg:105348068|filamin	-	-	-	gi|762144812|ref|XP_011455674.1|/0/PREDICTED: filamin-A-like isoform X16 [Crassostrea gigas]
Unigene0000545	835	60.92	432.977	2.8293	Up	0.912723	K04437|1|8e-124|290|crg:105348068|filamin	-	-	-	gi|762144778|ref|XP_011455656.1|/6.71551e-123/PREDICTED: filamin-C-like isoform X1 [Crassostrea gigas]
Unigene0014543	3273	30.6967	230.503	2.90863	Up	0.912203	K04462|1|0.0|1656|crg:105330257|ecotropic virus integration site 1 protein	-	-	-	gi|762095333|ref|XP_011430165.1|/0/PREDICTED: PR domain zinc finger protein 16-like isoform X2 [Crassostrea gigas]
Unigene0026273	699	2.85667	42.42	3.89234	Up	0.912171	K00771|1|1e-123|365|crg:105346131|protein xylosyltransferase [EC:2.4.2.26]	GO:0016020//membrane	GO:0030158//protein xylosyltransferase activity;GO:0008375//acetylglucosaminyltransferase activity	GO:0006024//glycosaminoglycan biosynthetic process	gi|762139135|ref|XP_011452909.1|/1.04112e-122/PREDICTED: xylosyltransferase oxt-like [Crassostrea gigas]
Unigene0004153	201	37.17	268.867	2.85468	Up	0.911866	-	-	-	-	-
Unigene0000543	1406	53.5067	375.3	2.81025	Up	0.911817	K04437|1|0.0|934|crg:105348068|filamin	-	-	-	gi|762144812|ref|XP_011455674.1|/0/PREDICTED: filamin-A-like isoform X16 [Crassostrea gigas]
Unigene0002198	2432	1.95	34.08	4.12738	Up	0.911689	K06255|1|0.0|1390|crg:105328642|heparan sulfate proteoglycan 2 (perlecan)	-	-	-	gi|762091045|ref|XP_011427908.1|/0/PREDICTED: basement membrane-specific heparan sulfate proteoglycan core protein-like isoform X3 [Crassostrea gigas]
Unigene0009838	1127	777.713	5388.72	2.79263	Up	0.911432	K07763|1|6e-152|539|crg:105338896|matrix metalloproteinase-14 (membrane-inserted) [EC:3.4.24.80];K07998|3|1e-33|146|xtr:100127631|matrix metalloproteinase-19 (RASI) [EC:3.4.24.-]	-	-	-	gi|762119183|ref|XP_011442491.1|/5.17114e-151/PREDICTED: stromelysin-3-like [Crassostrea gigas]
Unigene0002196	332	3.37333	44.9467	3.73597	Up	0.911212	K06255|1|9e-62|236|crg:105328642|heparan sulfate proteoglycan 2 (perlecan)	-	-	-	gi|762091053|ref|XP_011427913.1|/8.00551e-61/PREDICTED: basement membrane-specific heparan sulfate proteoglycan core protein-like isoform X7 [Crassostrea gigas]
Unigene0004402	846	20.37	159.177	2.96611	Up	0.911153	-	-	-	-	-
Unigene0007667	278	1137.12	7708.2	2.76101	Up	0.910628	-	-	-	-	-
Unigene0032252	283	28.13	202.47	2.84753	Up	0.910542	-	-	-	-	-
Unigene0031842	216	17.9933	140.54	2.96545	Up	0.910322	K04437|1|7e-29|127|crg:105348068|filamin	-	-	-	gi|762144812|ref|XP_011455674.1|/6.89671e-28/PREDICTED: filamin-A-like isoform X16 [Crassostrea gigas]
Unigene0000540	1223	89.2733	603.477	2.757	Up	0.90992	K04437|1|0.0|819|crg:105348068|filamin	-	-	-	gi|762144812|ref|XP_011455674.1|/0/PREDICTED: filamin-A-like isoform X16 [Crassostrea gigas]
Unigene0031962	3050	65.75	448.453	2.7699	Up	0.909712	K05725|1|0.0|1508|crg:105318395|focal adhesion kinase 1 [EC:2.7.10.2]	-	-	-	gi|762151606|ref|XP_011413791.1|/0/PREDICTED: focal adhesion kinase 1-like isoform X5 [Crassostrea gigas]
Unigene0031082	1722	3.28333	42.6167	3.69818	Up	0.909642	K06255|1|0.0|1142|crg:105328642|heparan sulfate proteoglycan 2 (perlecan)	-	-	-	gi|762091053|ref|XP_011427913.1|/0/PREDICTED: basement membrane-specific heparan sulfate proteoglycan core protein-like isoform X7 [Crassostrea gigas]
Unigene0000544	200	55.8967	380.817	2.76826	Up	0.90939	K04437|1|2e-31|135|crg:105348068|filamin	-	-	-	gi|762144812|ref|XP_011455674.1|/1.96383e-30/PREDICTED: filamin-A-like isoform X16 [Crassostrea gigas]
Unigene0000539	2775	86.05	551.593	2.68036	Up	0.908431	K04437|1|0.0|935|crg:105348068|filamin	-	-	-	gi|762144812|ref|XP_011455674.1|/0/PREDICTED: filamin-A-like isoform X16 [Crassostrea gigas]
Unigene0030487	375	43.7333	294.527	2.75159	Up	0.908297	K16686|1|5e-38|157|crg:105338884|scaffold protein salvador	-	-	-	gi|762119153|ref|XP_011442476.1|/4.74257e-37/PREDICTED: uncharacterized protein LOC105338884 [Crassostrea gigas]
Unigene0028181	583	6.43667	62.5	3.27947	Up	0.908024	-	-	-	-	gi|405978244|gb|EKC42650.1|/2.59659e-17/hypothetical protein CGI_10013279 [Crassostrea gigas]
Unigene0015345	2595	266.64	1638.6	2.6195	Up	0.907959	K00489|1|0.0|997|crg:105347692|cholesterol 7alpha-monooxygenase [EC:1.14.14.23];K07431|5|2e-63|246|acs:100565509|sterol 12-alpha-hydroxylase [EC:1.14.18.8 1.14.13.96]	GO:0005783//endoplasmic reticulum;GO:0044425	GO:0046872//metal ion binding;GO:0016491//oxidoreductase activity	-	gi|405967821|gb|EKC32948.1|/0/Cholesterol 7-alpha-monooxygenase [Crassostrea gigas]
Unigene0017715	1735	4.11667	46.6833	3.50336	Up	0.907134	K04207|1|5e-58|228|crg:105342895|neuropeptide Y receptor type 5;K04194|2|7e-40|167|crg:105333205|cholecystokinin A receptor;K04239|5|7e-27|124|crg:105334467|hypocretin (orexin) receptor 2	-	-	-	gi|405974887|gb|EKC39499.1|/0/Cholecystokinin receptor [Crassostrea gigas]
Unigene0010592	1164	7.96667	70.4767	3.1451	Up	0.90692	-	GO:0016021//integral component of membrane	-	-	gi|762084654|ref|XP_011424825.1|/3.06731e-146/PREDICTED: uncharacterized protein LOC105326467 isoform X2 [Crassostrea gigas]
Unigene0023127	951	4.85667	51.14	3.39641	Up	0.906839	K19511|1|1e-137|345|crg:105337122|peroxidase [EC:1.11.1.7]	GO:0043231//intracellular membrane-bounded organelle;GO:0044421	GO:0046906//tetrapyrrole binding;GO:0016209//antioxidant activity;GO:0005198//structural molecule activity	GO:0050896//response to stimulus;GO:0043062//extracellular structure organization;GO:0044710;GO:0042743//hydrogen peroxide metabolic process	gi|762114433|ref|XP_011439996.1|/7.87943e-141/PREDICTED: peroxidasin-like isoform X2 [Crassostrea gigas]
Unigene0010165	461	22.92	159.46	2.79852	Up	0.906491	-	-	-	-	gi|762160587|ref|XP_011418512.1|/1.61589e-61/PREDICTED: uncharacterized protein LOC105321760 [Crassostrea gigas]
Unigene0004154	413	27.42	183.34	2.74122	Up	0.905945	-	-	-	-	-
Unigene0000547	251	11.36	89.23	2.97357	Up	0.905864	-	-	-	-	-
Unigene0018964	1476	2.44333	34.3933	3.81521	Up	0.905623	-	-	-	-	gi|762148010|ref|XP_011411927.1|/0/PREDICTED: uncharacterized protein LOC105317094 [Crassostrea gigas]
Unigene0018984	1473	23.8333	159.63	2.74368	Up	0.905098	K03768|1|2e-68|262|dre:406292|peptidyl-prolyl cis-trans isomerase B (cyclophilin B) [EC:5.2.1.8]	-	GO:0016853//isomerase activity	GO:0044267//cellular protein metabolic process	gi|560122120|emb|CDJ93250.1|/3.27044e-69/Peptidyl-prolyl cis-trans isomerase domain containing protein [Haemonchus contortus]
Unigene0021952	1070	5.92333	54.82	3.21022	Up	0.904868	-	-	-	-	gi|762148494|ref|XP_011412169.1|/3.69464e-95/PREDICTED: uncharacterized protein LOC105317279 isoform X2 [Crassostrea gigas]
Unigene0000096	3051	41.1667	250.117	2.60305	Up	0.904455	K16727|1|2e-15|87.4|spu:100893442|Rho guanine nucleotide exchange factor 10	-	-	-	gi|762148217|ref|XP_011412028.1|/0/PREDICTED: uncharacterized protein LOC105317170 isoform X8 [Crassostrea gigas]
Unigene0028527	561	4.13333	44.09	3.41507	Up	0.90356	-	GO:0005576//extracellular region	GO:0005179//hormone activity	-	gi|762163602|ref|XP_011420093.1|/9.99844e-13/PREDICTED: uncharacterized protein LOC105322889 [Crassostrea gigas]
Unigene0020686	1219	5.85667	52.6167	3.16737	Up	0.903265	K12819|1|2e-29|132|dvi:Dvir_GJ26298|pre-mRNA-processing factor SLU7;K17550|2|4e-25|118|lgi:LOTGIDRAFT_176394|protein phosphatase 1 regulatory subunit 7;K08136|3|1e-09|66.6|cmk:103181299|sparc/osteonectin, cwcv and kazal-like domains proteoglycan (testican);K06254|5|6e-08|61.2|bfo:BRAFLDRAFT_118439|agrin	GO:0005578//proteinaceous extracellular matrix	GO:0005509//calcium ion binding	GO:0007165//signal transduction	gi|762142507|ref|XP_011454475.1|/2.07315e-132/PREDICTED: SPARC-like [Crassostrea gigas]
Unigene0020578	1234	6.99333	59.6367	3.09215	Up	0.903051	K08111|1|0.0|711|crg:105317070|glypican 5	-	-	-	gi|762147970|ref|XP_011411907.1|/0/PREDICTED: glypican-5-like [Crassostrea gigas]
Unigene0028519	559	5.29	49.8033	3.2349	Up	0.902939	-	-	-	-	-
Unigene0010511	248	2.44667	32.5067	3.73185	Up	0.901883	-	-	-	-	gi|762153307|ref|XP_011414686.1|/2.58201e-22/PREDICTED: uncharacterized protein LOC105319015 [Crassostrea gigas]
Unigene0028609	555	3.52	38.84	3.4639	Up	0.901786	K00771|1|2e-77|290|crg:105346131|protein xylosyltransferase [EC:2.4.2.26]	-	-	-	gi|762139135|ref|XP_011452909.1|/1.23346e-76/PREDICTED: xylosyltransferase oxt-like [Crassostrea gigas]
Unigene0007267	974	64.57	374.027	2.53421	Up	0.901744	-	-	-	-	gi|762092705|ref|XP_011428786.1|/1.40777e-127/PREDICTED: uncharacterized protein LOC105329293 [Crassostrea gigas]
Unigene0014636	3156	10.2933	73.5667	2.83734	Up	0.900934	K13499|1|0.0|1593|crg:105340352|chondroitin sulfate synthase [EC:2.4.1.175 2.4.1.226]	GO:0012505//endomembrane system;GO:0016020//membrane	GO:0008376//acetylgalactosaminyltransferase activity	GO:0006024//glycosaminoglycan biosynthetic process;GO:0001503//ossification;GO:0044238//primary metabolic process;GO:0006790//sulfur compound metabolic process	gi|405971421|gb|EKC36260.1|/0/Chondroitin sulfate synthase 1 [Crassostrea gigas]
Unigene0008286	6617	20.68	126.047	2.60765	Up	0.900699	K10314|1|7e-20|103|bacu:103002192|F-box protein 39;K20478|2|8e-19|76.3|acs:100562023|golgin subfamily B member 1;K05699|4|1e-18|99.8|bmy:Bm1_51465|actinin alpha	-	-	-	gi|762102263|ref|XP_011433623.1|/0/PREDICTED: cytospin-A-like isoform X3 [Crassostrea gigas]
Unigene0027960	594	122.577	670.703	2.45199	Up	0.900688	K06233|1|1e-18|94.7|mze:101488116|low density lipoprotein-related protein 2	-	-	-	gi|405977564|gb|EKC42007.1|/6.15596e-25/Low-density lipoprotein receptor [Crassostrea gigas]
Unigene0013597	5872	4.6	43.9833	3.25725	Up	0.900243	K19511|1|0.0|2042|crg:105337122|peroxidase [EC:1.11.1.7]	-	-	-	gi|762114433|ref|XP_011439996.1|/0/PREDICTED: peroxidasin-like isoform X2 [Crassostrea gigas]
Unigene0031781	490	107.29	579.373	2.43298	Up	0.899954	-	-	-	-	-
Unigene0015415	2565	14.21	93.7833	2.72243	Up	0.899895	K06823|1|0.0|999|crg:105339436|collagen, type XVIII, alpha	-	-	-	gi|762120734|ref|XP_011443287.1|/0/PREDICTED: collagen alpha-1(III) chain-like isoform X4 [Crassostrea gigas]
Unigene0007988	4818	183.917	968.21	2.39627	Up	0.899466	K03910|1|0.0|1483|crg:105342482|alpha-2-macroglobulin	-	-	-	gi|762115946|ref|XP_011440790.1|/0/PREDICTED: pregnancy zone protein-like [Crassostrea gigas]
Unigene0021134	1163	76.0467	409.987	2.43062	Up	0.899359	-	-	-	-	gi|762161748|ref|XP_011419113.1|/2.54223e-105/PREDICTED: uncharacterized protein LOC105322222 isoform X1 [Crassostrea gigas]
Unigene0007989	2027	211.517	1107.37	2.3883	Up	0.899257	K03910|1|5e-131|471|crg:105342482|alpha-2-macroglobulin	-	-	-	gi|762092295|ref|XP_011428578.1|/0/PREDICTED: uncharacterized protein LOC105329107 [Crassostrea gigas]
Unigene0006647	849	12.8567	85.8933	2.74003	Up	0.899241	K06823|1|2e-26|121|crg:105339436|collagen, type XVIII, alpha	-	-	-	gi|762120734|ref|XP_011443287.1|/6.44731e-27/PREDICTED: collagen alpha-1(III) chain-like isoform X4 [Crassostrea gigas]
Unigene0007678	467	3.52667	37.6433	3.41602	Up	0.899	-	-	-	-	gi|762102543|ref|XP_011433768.1|/1.16451e-22/PREDICTED: uncharacterized protein LOC105332769 [Crassostrea gigas]
Unigene0004516	558	14.0467	90.17	2.68242	Up	0.898684	K10352|1|3e-63|243|crg:105332668|myosin heavy chain	-	-	-	gi|762102302|ref|XP_011433644.1|/1.76306e-62/PREDICTED: myosin-11-like [Crassostrea gigas]
Unigene0004487	380	65.2633	348.41	2.41644	Up	0.898657	-	-	-	-	-
Unigene0000857	876	7.95667	58.6333	2.88149	Up	0.897623	-	-	-	-	-
Unigene0000863	638	5.55667	46.7967	3.07411	Up	0.897489	-	-	-	-	-
Unigene0006646	2876	24.8167	135.287	2.44664	Up	0.89466	K06823|1|2e-107|378|crg:105339436|collagen, type XVIII, alpha	-	-	-	gi|762120728|ref|XP_011443284.1|/1.96186e-106/PREDICTED: collagen alpha-1(III) chain-like isoform X1 [Crassostrea gigas]
Unigene0027788	602	17.7333	101.437	2.51604	Up	0.893706	-	-	-	-	gi|405978245|gb|EKC42651.1|/2.45782e-13/hypothetical protein CGI_10013280 [Crassostrea gigas]
Unigene0008644	1297	18.5767	100.843	2.44055	Up	0.891466	K05725|1|0.0|884|crg:105318395|focal adhesion kinase 1 [EC:2.7.10.2]	-	-	-	gi|762151600|ref|XP_011413788.1|/0/PREDICTED: focal adhesion kinase 1-like isoform X2 [Crassostrea gigas]
Unigene0008788	857	74.7767	363.547	2.28148	Up	0.890663	K19867|1|5e-121|436|crg:105335510|LIM domain-binding protein 3	-	GO:0046872//metal ion binding	-	gi|762110084|ref|XP_011437718.1|/3.88446e-120/PREDICTED: PDZ and LIM domain protein 1-like isoform X1 [Crassostrea gigas]
Unigene0016764	2001	7.29333	48.9233	2.74587	Up	0.889039	K16727|1|0.0|1234|crg:105340678|Rho guanine nucleotide exchange factor 10	-	-	-	gi|762124297|ref|XP_011445156.1|/0/PREDICTED: rho guanine nucleotide exchange factor 10-like protein [Crassostrea gigas]
Unigene0018991	1472	1.51333	22	3.8617	Up	0.888396	K18809|1|4e-18|95.1|cqu:CpipJ_CPIJ008497|protein toll	-	-	-	gi|762148010|ref|XP_011411927.1|/0/PREDICTED: uncharacterized protein LOC105317094 [Crassostrea gigas]
Unigene0010669	422	56.7267	269.447	2.2479	Up	0.888364	-	-	-	-	gi|405974314|gb|EKC38970.1|/4.75906e-13/TSC22 domain family protein 1 [Crassostrea gigas]
Unigene0026296	700	31.6767	156.27	2.30255	Up	0.887919	K07763|1|5e-42|172|lgi:LOTGIDRAFT_200320|matrix metalloproteinase-14 (membrane-inserted) [EC:3.4.24.80];K08003|5|3e-28|127|acs:100559558|matrix metalloproteinase-25 (membrane-inserted) [EC:3.4.24.-]	-	GO:0016787//hydrolase activity	-	gi|762134288|ref|XP_011450367.1|/1.79943e-113/PREDICTED: matrix metalloproteinase-24-like [Crassostrea gigas]
Unigene0018832	1502	10.77	63.0667	2.54986	Up	0.887447	-	-	-	-	-
Unigene0007668	697	11.4167	65.6	2.52255	Up	0.887163	K04550|1|4e-16|54.3|dpo:Dpse_GA24641|low-density lipoprotein receptor-related protein 1 (alpha-2-macroglobulin receptor)	-	-	-	gi|255918310|gb|ACU33970.1|/1.35261e-38/low-density lipoprotein receptor precursor [Crassostrea angulata]
Unigene0013359	358	82.9967	375.963	2.17947	Up	0.886992	K07763|1|3e-27|122|lgi:LOTGIDRAFT_200320|matrix metalloproteinase-14 (membrane-inserted) [EC:3.4.24.80]	-	GO:0016787//hydrolase activity	-	gi|782977134|gb|AJZ73171.1|/1.26287e-37/matrix metalloproteinase 1 [Crassostrea virginica]
Unigene0000100	610	18.7633	94.8867	2.33829	Up	0.886944	-	-	-	-	-
Unigene0016038	2255	4.78667	36.82	2.9434	Up	0.886874	-	-	-	-	gi|762120434|ref|XP_011443142.1|/3.29808e-85/PREDICTED: uncharacterized protein LOC105339345 [Crassostrea gigas]
Unigene0021852	1070	7.20333	45.7367	2.66661	Up	0.885679	K07374|1|8e-26|120|hgl:101701752|tubulin alpha;K10165|3|7e-14|80.5|oaa:100090933|nucleotide-binding oligomerization domain-containing protein 2	-	-	-	gi|919077604|ref|XP_013419929.1|/1.13083e-71/PREDICTED: leucine-rich repeat-containing protein 74A-like [Lingula anatina]
Unigene0008789	1704	43.37	198.313	2.19301	Up	0.884725	K19867|1|7e-53|211|crg:105335510|LIM domain-binding protein 3	-	GO:0046872//metal ion binding	-	gi|762110084|ref|XP_011437718.1|/5.76126e-52/PREDICTED: PDZ and LIM domain protein 1-like isoform X1 [Crassostrea gigas]
Unigene0020937	1188	6.27667	41.9867	2.74186	Up	0.884677	K08785|1|3e-10|68.9|dre:445108|HtrA serine peptidase 3 [EC:3.4.21.-];K04661|2|6e-10|67.8|nve:NEMVE_v1g141657|follistatin;K06254|3|6e-10|67.8|aec:105150915|agrin	-	-	-	gi|388267609|gb|AFK25804.1|/1.10858e-98/follistatin-like protein 1 [Crassostrea angulata]
Unigene0020645	1219	29.52	140.123	2.24693	Up	0.884554	-	-	-	-	gi|762126971|ref|XP_011446555.1|/3.33023e-122/PREDICTED: uncharacterized protein LOC105341631 isoform X4 [Crassostrea gigas]
Unigene0010164	761	13.8833	71.83	2.37123	Up	0.88435	-	-	-	-	gi|762160587|ref|XP_011418512.1|/3.45628e-87/PREDICTED: uncharacterized protein LOC105321760 [Crassostrea gigas]
Unigene0030517	361	9.00333	52.9967	2.55737	Up	0.884286	-	-	-	-	-
Unigene0011091	305	113.79	492.007	2.1123	Up	0.884136	K16687|1|2e-48|192|crg:105332932|transcriptional coactivator YAP1	-	-	-	gi|762102951|ref|XP_011433981.1|/2.30819e-47/PREDICTED: transcriptional coactivator YAP1-like isoform X5 [Crassostrea gigas]
Unigene0010163	922	10.98	60.2867	2.45696	Up	0.884066	-	-	-	-	gi|762160587|ref|XP_011418512.1|/1.0344e-76/PREDICTED: uncharacterized protein LOC105321760 [Crassostrea gigas]
Unigene0000095	2322	7.13667	44.11	2.62778	Up	0.883766	-	-	-	-	-
Unigene0017394	1812	27.1333	128.03	2.23834	Up	0.883391	K07859|1|4e-124|447|crg:105337521|Rho family GTPase 3	GO:0005622//intracellular	GO:0005525//GTP binding	GO:0007264//small GTPase mediated signal transduction	gi|762115502|ref|XP_011440556.1|/3.03357e-123/PREDICTED: rho-related GTP-binding protein RhoE-like isoform X1 [Crassostrea gigas]
Unigene0004489	376	11.1667	60.2833	2.43256	Up	0.88315	-	-	-	-	-
Unigene0026286	699	24.5433	115.583	2.23553	Up	0.882459	-	-	-	-	-
Unigene0012033	355	6.35667	40.3733	2.66706	Up	0.882036	K06560|1|8e-07|54.3|pbi:103048825|mannose receptor, C type;K17513|2|1e-06|53.9|mze:101486018|C-type lectin superfamily 17 member A	-	-	-	gi|762167211|ref|XP_011421928.1|/1.00066e-42/PREDICTED: perlucin-like protein [Crassostrea gigas]
Unigene0018315	1604	11.3467	59.7433	2.39651	Up	0.881993	-	-	-	-	-
Unigene0012031	395	7	42.29	2.59489	Up	0.880862	-	-	-	-	gi|762167211|ref|XP_011421928.1|/3.69883e-37/PREDICTED: perlucin-like protein [Crassostrea gigas]
Unigene0011092	794	45.0233	194.343	2.10986	Up	0.88075	K16687|1|4e-79|296|crg:105332932|transcriptional coactivator YAP1;K16820|4|2e-21|104|tgu:100222689|WW domain-containing transcription regulator protein 1	-	-	-	gi|762102951|ref|XP_011433981.1|/3.17927e-78/PREDICTED: transcriptional coactivator YAP1-like isoform X5 [Crassostrea gigas]
Unigene0014801	3000	1.85667	21.5833	3.53913	Up	0.880171	K17256|1|4e-47|192|bfo:BRAFLDRAFT_165792|insulin-like growth factor-binding protein complex acid labile subunit;K13023|5|7e-43|178|mcc:707574|carboxypeptidase N regulatory subunit	-	-	-	gi|762107253|ref|XP_011436222.1|/0/PREDICTED: leucine-rich repeat-containing protein 15-like [Crassostrea gigas]
Unigene0004318	788	3.94	29.9633	2.92693	Up	0.879608	-	-	-	-	gi|762100351|ref|XP_011432625.1|/2.22642e-100/PREDICTED: uncharacterized protein LOC105331928 isoform X12 [Crassostrea gigas]
Unigene0007268	710	16.8133	81.01	2.26849	Up	0.879131	-	-	-	-	-
Unigene0022423	1023	29.44	128.417	2.12498	Up	0.878285	K12375|1|7e-48|193|lgi:LOTGIDRAFT_137302|arylsulfatase I/J [EC:3.1.6.-]	-	-	-	gi|405977794|gb|EKC42228.1|/4.99781e-107/Arylsulfatase I [Crassostrea gigas]
Unigene0031868	398	50.9567	209.373	2.03873	Up	0.878236	K14380|1|8e-44|177|hro:HELRODRAFT_114881|four and a half LIM domains protein 2	GO:0031672//A band	GO:0005515//protein binding	GO:0010927	gi|762120083|ref|XP_011442961.1|/3.7657e-82/PREDICTED: four and a half LIM domains protein 2-like isoform X9 [Crassostrea gigas]
Unigene0019986	1311	10.16	52.4767	2.36878	Up	0.878081	K03768|1|4e-113|410|crg:105321527|peptidyl-prolyl cis-trans isomerase B (cyclophilin B) [EC:5.2.1.8]	-	GO:0016853//isomerase activity	GO:0044267//cellular protein metabolic process	gi|338815377|gb|AEJ08751.1|/1.15333e-115/cyclophilin B-like protein [Crassostrea ariakensis]
Unigene0002195	294	5.35667	34.6033	2.6915	Up	0.87792	K06255|1|2e-48|192|crg:105328642|heparan sulfate proteoglycan 2 (perlecan)	-	-	-	gi|762091053|ref|XP_011427913.1|/2.74504e-48/PREDICTED: basement membrane-specific heparan sulfate proteoglycan core protein-like isoform X7 [Crassostrea gigas]
Unigene0006157	2111	3.33333	26.66	2.99964	Up	0.877813	K07908|1|8e-123|443|crg:105324949|Ras-related protein Rab-15	GO:0005622//intracellular	GO:0005525//GTP binding	GO:0007264//small GTPase mediated signal transduction	gi|762168328|ref|XP_011422531.1|/6.94689e-122/PREDICTED: ras-related protein Rab-13-like [Crassostrea gigas]
Unigene0003161	2411	5.30333	34.29	2.69282	Up	0.877685	K13304|1|0.0|753|crg:105331539|serum/glucocorticoid-regulated kinase 3 [EC:2.7.11.1];K13302|5|3e-158|561|nve:NEMVE_v1g115630|serum/glucocorticoid-regulated kinase 1 [EC:2.7.11.1]	-	GO:0005543//phospholipid binding;GO:0004672//protein kinase activity;GO:0032550	GO:0044763;GO:0006796//phosphate-containing compound metabolic process;GO:0006464//cellular protein modification process	gi|762099307|ref|XP_011432074.1|/0/PREDICTED: serine/threonine-protein kinase Sgk1-like [Crassostrea gigas]
Unigene0012425	772	31.37	133.683	2.09136	Up	0.877208	-	-	-	-	gi|762105700|ref|XP_011435423.1|/2.41134e-27/PREDICTED: uncharacterized protein LOC105333905 [Crassostrea gigas]
Unigene0013579	6207	9.17	48.32	2.39763	Up	0.877154	K05769|1|2e-29|135|nve:NEMVE_v1g92887|Rho guanine nucleotide exchange factor 4;K05730|2|1e-28|132|sko:102802054|guanine nucleotide exchange factor VAV;K01530|3|5e-28|130|tup:102501475|phospholipid-translocating ATPase [EC:3.6.3.1];K08810|4|3e-27|127|phu:Phum_PHUM149600|triple functional domain protein [EC:2.7.11.1]	-	-	-	gi|762139948|ref|XP_011453136.1|/0/PREDICTED: uncharacterized protein LOC105346307 isoform X4 [Crassostrea gigas]
Unigene0008291	2654	35.2067	145.32	2.04531	Up	0.876281	K13646|1|0.0|1429|crg:105335547|lysyl hydroxylase/galactosyltransferase/glucosyltransferase [EC:1.14.11.4 2.4.1.50 2.4.1.66];K13647|5|0.0|769|ame:100578909|procollagen-lysine,2-oxoglutarate 5-dioxygenase, invertebrate [EC:1.14.11.4]	-	GO:0051213//dioxygenase activity;GO:0043167//ion binding;GO:0016705//oxidoreductase activity, acting on paired donors, with incorporation or reduction of molecular oxygen	GO:0007411//axon guidance	gi|405960464|gb|EKC26389.1|/0/Procollagen-lysine,2-oxoglutarate 5-dioxygenase 3 [Crassostrea gigas]
Unigene0030731	1998	3.07333	25.1233	3.03115	Up	0.875997	K12567|1|0.0|878|crg:105342773|titin [EC:2.7.11.1]	-	-	-	gi|762129970|ref|XP_011448113.1|/0/PREDICTED: titin-like [Crassostrea gigas]
Unigene0009527	444	15.65	73.5233	2.23204	Up	0.87597	-	-	-	-	-
Unigene0005769	438	33.35	137.073	2.03919	Up	0.875273	-	-	-	-	gi|762124669|ref|XP_011445354.1|/5.85031e-67/PREDICTED: stAR-related lipid transfer protein 5-like isoform X2 [Crassostrea gigas]
Unigene0020103	1293	11.09	54.91	2.30781	Up	0.874373	-	-	-	-	gi|762103410|ref|XP_011434224.1|/4.92237e-154/PREDICTED: uncharacterized protein LOC105333099 isoform X2 [Crassostrea gigas]
Unigene0033026	1218	19.21	84.7233	2.1409	Up	0.874362	-	-	-	-	gi|762142855|ref|XP_011454658.1|/1.37212e-59/PREDICTED: uncharacterized protein LOC105347328 [Crassostrea gigas]
Unigene0030780	5580	2.32667	21.7667	3.22578	Up	0.874111	K12567|1|0.0|486|crg:105342773|titin [EC:2.7.11.1]	-	-	-	gi|405970417|gb|EKC35325.1|/0/Titin [Crassostrea gigas]
Unigene0002433	4940	1.14333	16.5033	3.85144	Up	0.873151	K03909|1|5e-25|120|myd:102764934|tissue factor pathway inhibitor	-	-	-	gi|762169189|ref|XP_011422994.1|/0/PREDICTED: uncharacterized protein ZC84.1-like isoform X7 [Crassostrea gigas]
Unigene0025752	736	2.80667	23.3867	3.05876	Up	0.873103	-	-	-	-	-
Unigene0016967	1931	6.50333	37.03	2.50944	Up	0.87291	-	GO:0016021//integral component of membrane	-	-	gi|762080945|ref|XP_011419762.1|/0/PREDICTED: uncharacterized protein LOC105322632 [Crassostrea gigas]
Unigene0031957	2682	7.04	38.4867	2.45071	Up	0.872294	K06238|1|2e-43|180|bfo:BRAFLDRAFT_90332|collagen, type VI, alpha	-	-	-	gi|762095041|ref|XP_011430018.1|/0/PREDICTED: CUB and sushi domain-containing protein 3-like isoform X2 [Crassostrea gigas]
Unigene0016537	2069	28.1433	114.17	2.02032	Up	0.87179	K08625|1|8e-16|88.2|hro:HELRODRAFT_163021|a disintegrin and metalloproteinase with thrombospondin motifs 10 [EC:3.4.24.-]	-	-	-	gi|762121698|ref|XP_011443784.1|/0/PREDICTED: uncharacterized protein LOC105339768 [Crassostrea gigas]
Unigene0023423	926	3.31333	24.9167	2.91076	Up	0.871576	-	-	-	-	-
Unigene0013358	1219	56.7467	223.453	1.97737	Up	0.871265	K07763|1|6e-34|147|lgi:LOTGIDRAFT_200320|matrix metalloproteinase-14 (membrane-inserted) [EC:3.4.24.80]	-	GO:0016787//hydrolase activity;GO:0016787//hydrolase activity	-	gi|762134288|ref|XP_011450367.1|/8.82496e-99/PREDICTED: matrix metalloproteinase-24-like [Crassostrea gigas]
Unigene0000400	350	1.21	16.5567	3.77433	Up	0.871228	K12567|1|1e-27|123|crg:105342773|titin [EC:2.7.11.1]	-	-	-	gi|762129970|ref|XP_011448113.1|/1.01002e-26/PREDICTED: titin-like [Crassostrea gigas]
Unigene0005899	498	8.9	44.4333	2.31977	Up	0.870762	K07819|1|6e-56|218|crg:105348220|beta-1,3-galactosyltransferase 1 [EC:2.4.1.-]	-	-	-	gi|762125536|ref|XP_011445796.1|/9.0939e-87/PREDICTED: beta-1,3-galactosyltransferase 5-like [Crassostrea gigas]
Unigene0008478	592	19.5333	81.0467	2.05281	Up	0.869583	K06560|1|4e-14|79.7|nve:NEMVE_v1g238062|mannose receptor, C type	GO:0016021//integral component of membrane	-	-	gi|762137478|ref|XP_011452033.1|/7.01032e-98/PREDICTED: uncharacterized protein LOC105345549 isoform X2 [Crassostrea gigas]
Unigene0026308	699	280.803	1054.34	1.9087	Up	0.869529	K04565|1|1e-17|92.0|crg:105324007|superoxide dismutase, Cu-Zn family [EC:1.15.1.1];K16627|2|5e-08|60.1|apla:101804513|superoxide dismutase, Cu-Zn family [EC:1.15.1.1]	-	GO:0003824//catalytic activity;GO:0016209//antioxidant activity;GO:0043169//cation binding	GO:0044710;GO:0072593//reactive oxygen species metabolic process	gi|758343815|gb|AJO68013.1|/8.32935e-87/superoxide dismutase [Crassostrea hongkongensis]
Unigene0019379	1402	60.9733	236.037	1.95276	Up	0.868457	-	-	-	-	-
Unigene0017887	1697	1.89	18.79	3.31351	Up	0.867825	-	-	-	-	-
Unigene0019657	1359	12.3633	55.0733	2.15529	Up	0.86737	-	-	-	-	gi|762113401|ref|XP_011439458.1|/4.11953e-156/PREDICTED: uncharacterized protein LOC105336723 [Crassostrea gigas]
Unigene0023166	942	11.3667	51.84	2.18926	Up	0.867332	K02183|1|2e-06|55.8|spu:591984|calmodulin	-	-	-	gi|762118834|ref|XP_011442310.1|/9.16842e-60/PREDICTED: uncharacterized protein LOC105338751, partial [Crassostrea gigas]
Unigene0000858	218	1.69667	17.75	3.38704	Up	0.867118	-	-	-	-	-
Unigene0028496	562	62.12	232.81	1.90602	Up	0.86618	-	-	-	-	-
Unigene0016793	1990	128.797	468.207	1.86205	Up	0.865623	K10091|1|0.0|784|crg:105336659|galectin-4;K06832|5|3e-54|215|crg:105331885|galectin-8	-	-	-	gi|762130073|ref|XP_011448166.1|/0/PREDICTED: galectin-4-like [Crassostrea gigas]
Unigene0018189	1632	6.82	34.8067	2.35152	Up	0.86551	K20526|1|2e-107|392|crg:105340926|transgelin	-	-	-	gi|405965704|gb|EKC31063.1|/5.94017e-107/Muscle-specific protein 20 [Crassostrea gigas]
Unigene0002483	4496	6.71667	34.1933	2.3479	Up	0.864899	K17495|1|0.0|2020|crg:105325093|CUB and sushi domain-containing protein	-	-	-	gi|762168784|ref|XP_011422778.1|/0/PREDICTED: sushi, von Willebrand factor type A, EGF and pentraxin domain-containing protein 1-like [Crassostrea gigas]
Unigene0015742	2403	10.6	47.6367	2.16801	Up	0.864171	K01080|1|6e-176|620|crg:105342753|phosphatidate phosphatase [EC:3.1.3.4]	GO:0016020//membrane	GO:0016791//phosphatase activity;GO:0005488	GO:0060070//canonical Wnt signaling pathway;GO:0031647//regulation of protein stability;GO:0044255//cellular lipid metabolic process;GO:0006807//nitrogen compound metabolic process;GO:0001932//regulation of protein phosphorylation;GO:0022409//positive regulation of cell-cell adhesion;GO:0044093;GO:0010595//positive regulation of endothelial cell migration;GO:0032501//multicellular organismal proc…	gi|762129913|ref|XP_011448084.1|/4.83119e-175/PREDICTED: lipid phosphate phosphohydrolase 3-like [Crassostrea gigas]
Unigene0018013	1666	6.21333	32.0467	2.36673	Up	0.863292	K04661|1|0.0|700|crg:105340356|follistatin	-	-	-	gi|762123391|ref|XP_011444673.1|/0/PREDICTED: follistatin-A-like isoform X1 [Crassostrea gigas]
Unigene0005206	1530	2.16	18.8	3.12163	Up	0.863271	K05741|1|2e-32|142|crg:105331485|diaphanous 2;K05740|2|1e-27|126|ola:101169616|diaphanous 1;K05745|3|7e-27|124|cfa:485474|diaphanous 3	-	-	-	gi|762100351|ref|XP_011432625.1|/0/PREDICTED: uncharacterized protein LOC105331928 isoform X12 [Crassostrea gigas]
Unigene0025816	726	9.79667	44.5233	2.1842	Up	0.862799	K14445|1|8e-111|401|crg:105327127|solute carrier family 13 (sodium-dependent dicarboxylate transporter), member 2/3/5	-	-	-	gi|762086919|ref|XP_011425741.1|/1.80224e-111/PREDICTED: solute carrier family 13 member 5-like isoform X3 [Crassostrea gigas]
Unigene0021792	1086	4.03667	24.7567	2.61658	Up	0.862767	-	-	-	-	gi|762097773|ref|XP_011431465.1|/4.26871e-38/PREDICTED: acetylcholine receptor subunit alpha-type unc-38-like [Crassostrea gigas]
Unigene0002783	298	5.79667	30.2233	2.38237	Up	0.861518	K13293|1|6e-12|52.0|mde:101888529|cAMP-specific phosphodiesterase 4 [EC:3.1.4.53]	-	-	-	gi|405976508|gb|EKC41013.1|/8.87221e-23/cAMP-specific 3',5'-cyclic phosphodiesterase [Crassostrea gigas]
Unigene0007095	1075	476.837	1642.01	1.78389	Up	0.86065	K05692|1|3e-26|121|umr:103665813|actin beta/gamma 1	GO:0005856//cytoskeleton;GO:0043292//contractile fiber;GO:0043189//H4/H2A histone acetyltransferase complex	GO:0032550	GO:0051084//'de novo' posttranslational protein folding;GO:0051707//response to other organism;GO:0006939//smooth muscle contraction;GO:0072008;GO:0008015//blood circulation	gi|686610242|ref|XP_009281779.1|/1.39832e-25/PREDICTED: LOW QUALITY PROTEIN: actin, cytoplasmic 2 [Aptenodytes forsteri]
Unigene0000094	393	10.06	44.2733	2.13781	Up	0.860559	-	-	-	-	gi|762148217|ref|XP_011412028.1|/3.85475e-18/PREDICTED: uncharacterized protein LOC105317170 isoform X8 [Crassostrea gigas]
Unigene0005768	879	26.54	100.293	1.91799	Up	0.859782	-	-	GO:0008289//lipid binding	-	gi|762124669|ref|XP_011445354.1|/1.40297e-19/PREDICTED: stAR-related lipid transfer protein 5-like isoform X2 [Crassostrea gigas]
Unigene0013715	4997	51.11	181.747	1.83025	Up	0.859713	K13912|1|0.0|831|crg:105344708|deleted in malignant brain tumors 1 protein	-	-	-	gi|762162815|ref|XP_011419684.1|/0/PREDICTED: coadhesin-like isoform X1 [Crassostrea gigas]
Unigene0015111	2750	5.28	28.06	2.40991	Up	0.859359	K01313|1|0.0|874|crg:105327809|coagulation factor II (thrombin) [EC:3.4.21.5];K05502|4|0.0|621|crg:105337626|bone morphogenetic protein 1 [EC:3.4.24.19]	-	-	-	gi|762088830|ref|XP_011426741.1|/0/PREDICTED: titin-like [Crassostrea gigas]
Unigene0000732	5928	5.57	28.8867	2.37465	Up	0.859241	K05636|1|0.0|2059|lgi:LOTGIDRAFT_209765|laminin, beta 1;K06243|2|0.0|1803|sko:100371750|laminin, beta 2	-	-	-	gi|676468132|ref|XP_009058110.1|/0/hypothetical protein LOTGIDRAFT_209765 [Lottia gigantea]
Unigene0008990	919	4.84333	26.7067	2.46313	Up	0.859064	K05456|1|2e-159|563|crg:105345771|neuregulin 2	-	-	-	gi|762138101|ref|XP_011452361.1|/1.81971e-158/PREDICTED: uncharacterized protein LOC105345771 isoform X2 [Crassostrea gigas]
Unigene0014474	3346	13.5867	54.8367	2.01295	Up	0.858453	K16687|1|1e-65|240|crg:105332932|transcriptional coactivator YAP1	-	-	-	gi|762102943|ref|XP_011433977.1|/8.32144e-65/PREDICTED: transcriptional coactivator YAP1-like isoform X1 [Crassostrea gigas]
Unigene0009525	548	36.86	132.333	1.84405	Up	0.857918	K05619|1|8e-19|95.1|crg:105341630|transglutaminase 1 [EC:2.3.2.13]	-	-	-	gi|762126963|ref|XP_011446551.1|/5.59505e-18/PREDICTED: annulin-like isoform X2 [Crassostrea gigas]
Unigene0013603	5767	8.27333	37.3767	2.1756	Up	0.857751	K12567|1|0.0|2194|crg:105344167|titin [EC:2.7.11.1]	-	-	-	gi|762133832|ref|XP_011450130.1|/0/PREDICTED: twitchin-like [Crassostrea gigas]
Unigene0029303	516	3.43667	21.7267	2.66039	Up	0.857741	-	-	-	-	gi|762086112|ref|XP_011425322.1|/9.78844e-45/PREDICTED: uncharacterized protein LOC105326841 [Crassostrea gigas]
Unigene0002353	1802	19.3467	74.71	1.94922	Up	0.857017	K14380|1|4e-82|308|hro:HELRODRAFT_114881|four and a half LIM domains protein 2	-	-	-	gi|762120077|ref|XP_011442958.1|/2.2453e-102/PREDICTED: prickle-like protein 3 isoform X6 [Crassostrea gigas]
Unigene0019900	1319	4.63333	25.4567	2.45792	Up	0.856803	-	-	-	-	-
Unigene0024791	812	5.73	28.8167	2.3303	Up	0.856669	K16796|1|2e-09|65.1|phu:Phum_PHUM462920|transcription factor SOX2 (SOX group B);K09267|2|1e-08|62.8|bfo:BRAFLDRAFT_130889|transcription factor SOX1/3/14/21 (SOX group B)	-	-	-	gi|762087171|ref|XP_011425869.1|/3.55156e-88/PREDICTED: uncharacterized protein LOC105327228 [Crassostrea gigas]
Unigene0008058	1846	10.45	43.6533	2.06259	Up	0.856487	K12567|1|0.0|1164|crg:105344167|titin [EC:2.7.11.1]	-	-	-	gi|762133832|ref|XP_011450130.1|/0/PREDICTED: twitchin-like [Crassostrea gigas]
Unigene0005317	381	679.573	2225.6	1.7115	Up	0.855946	K16642|1|1e-56|219|crg:105344949|pleiotrophin	-	-	-	gi|762135843|ref|XP_011451176.1|/1.01141e-55/PREDICTED: uncharacterized protein LOC105344949 [Crassostrea gigas]
Unigene0007577	366	55.8167	189.827	1.76591	Up	0.855126	-	-	-	-	gi|762079717|ref|XP_011413208.1|/7.42032e-14/PREDICTED: uncharacterized protein LOC105318038 [Crassostrea gigas]
Unigene0015084	2772	5.37333	27.1633	2.33777	Up	0.855008	K16727|1|2e-146|522|crg:105340678|Rho guanine nucleotide exchange factor 10	-	-	-	gi|762124297|ref|XP_011445156.1|/1.62635e-145/PREDICTED: rho guanine nucleotide exchange factor 10-like protein [Crassostrea gigas]
Unigene0012985	402	4.17	23.5467	2.4974	Up	0.854483	-	-	-	-	-
Unigene0014430	3399	8.48	36.86	2.11992	Up	0.854247	K17256|1|1e-59|234|aam:106500008|insulin-like growth factor-binding protein complex acid labile subunit	-	-	-	gi|762155010|ref|XP_011415594.1|/0/PREDICTED: insulin-like growth factor-binding protein complex acid labile subunit [Crassostrea gigas]
Unigene0022294	1033	36.4767	127.32	1.80341	Up	0.854236	-	-	-	-	gi|405972420|gb|EKC37190.1|/7.20761e-149/PI-PLC X domain-containing protein 3, partial [Crassostrea gigas]
Unigene0019539	1379	162.927	529.993	1.70175	Up	0.854151	K16866|1|1e-119|432|crg:105323667|metalloproteinase inhibitor 3	GO:0005576//extracellular region	GO:0008191//metalloendopeptidase inhibitor activity;GO:0004866//endopeptidase inhibitor activity	GO:0010951//negative regulation of endopeptidase activity	gi|765826450|ref|NP_001292265.1|/1.19143e-118/metalloproteinase inhibitor 2-like precursor [Crassostrea gigas]
Unigene0017122	1887	20.3333	75.1567	1.88605	Up	0.853743	K18040|1|1e-30|137|xma:102225180|tyrosine-protein phosphatase non-receptor type 23 [EC:3.1.3.48]	-	GO:0016740//transferase activity	-	gi|762092987|ref|XP_011428938.1|/0/PREDICTED: rhophilin-2-B-like isoform X1 [Crassostrea gigas]
Unigene0018986	1472	4.90667	25.4333	2.37391	Up	0.853658	-	-	-	-	gi|762111092|ref|XP_011438254.1|/1.21992e-132/PREDICTED: uncharacterized protein LOC105335838 isoform X1 [Crassostrea gigas]
Unigene0014872	2929	20.97	77.2667	1.88152	Up	0.853583	-	-	-	-	gi|762090698|ref|XP_011427730.1|/1.40771e-62/PREDICTED: pro-neuregulin-3, membrane-bound isoform-like isoform X2 [Crassostrea gigas]
Unigene0003469	1479	26.4533	93.7533	1.82542	Up	0.853272	K05691|1|0.0|876|crg:105337238|catenin alpha	GO:0005856//cytoskeleton	GO:0050839//cell adhesion molecule binding	GO:0022610//biological adhesion	gi|762114781|ref|XP_011440182.1|/0/PREDICTED: catenin alpha-2-like isoform X7 [Crassostrea gigas]
Unigene0019943	1318	6.76	31.4933	2.21995	Up	0.85324	K16353|1|4e-13|78.6|crg:105342949|protein sidekick;K19533|2|3e-08|62.4|tup:102500690|synaptonemal complex protein 1;K03986|3|1e-07|60.5|phi:102105876|complement C1q subcomponent subunit A	-	-	-	gi|762089517|ref|XP_011427112.1|/0/PREDICTED: uncharacterized protein LOC105328060 [Crassostrea gigas]
Unigene0021257	1147	13.3933	52.7167	1.97674	Up	0.853143	K17341|1|7e-07|57.4|loa:LOAG_07292|hemicentin	-	-	-	gi|762114271|ref|XP_011439910.1|/7.34121e-176/PREDICTED: uncharacterized protein LOC105337051 [Crassostrea gigas]
Unigene0028846	542	5.86333	28.6633	2.28941	Up	0.852559	K20307|1|3e-20|99.8|lgi:LOTGIDRAFT_154413|trafficking protein particle complex subunit 10	-	-	-	gi|676475033|ref|XP_009060341.1|/2.23103e-19/hypothetical protein LOTGIDRAFT_154413 [Lottia gigantea]
Unigene0011376	286	10.6867	42.9	2.00517	Up	0.851863	-	-	-	-	-
Unigene0024434	837	0.816667	12.0433	3.88234	Up	0.851412	-	-	-	-	-
Unigene0027449	624	40.06	134.023	1.74225	Up	0.850212	-	-	-	-	-
Unigene0018133	1643	18.5967	67.4933	1.8597	Up	0.849864	K12375|1|1e-13|80.5|lcm:102361779|arylsulfatase I/J [EC:3.1.6.-]	-	-	-	gi|405977794|gb|EKC42228.1|/6.60193e-114/Arylsulfatase I [Crassostrea gigas]
Unigene0003468	1363	28.7267	98.5867	1.779	Up	0.849703	K05691|1|1e-177|624|crg:105337238|catenin alpha	-	-	-	gi|762114781|ref|XP_011440182.1|/1.23577e-176/PREDICTED: catenin alpha-2-like isoform X7 [Crassostrea gigas]
Unigene0023292	927	2.97667	18.6967	2.65101	Up	0.849371	K20307|1|8e-93|342|obi:106871725|trafficking protein particle complex subunit 10	-	-	-	gi|524873184|ref|XP_005093343.1|/2.0871e-93/PREDICTED: trafficking protein particle complex subunit 10-like [Aplysia californica]
Unigene0009723	423	16.5267	60.72	1.87738	Up	0.849049	-	-	-	-	-
Unigene0003470	298	71.9733	227.9	1.66287	Up	0.848347	K05691|1|3e-24|112|crg:105337238|catenin alpha	GO:0005856//cytoskeleton	GO:0050839//cell adhesion molecule binding	GO:0022610//biological adhesion	gi|762114781|ref|XP_011440182.1|/3.04934e-23/PREDICTED: catenin alpha-2-like isoform X7 [Crassostrea gigas]
Unigene0015730	2414	14.2633	53.07	1.89559	Up	0.847233	K05466|1|2e-45|187|bfo:BRAFLDRAFT_218195|angiopoietin 2	-	-	-	gi|405960634|gb|EKC26538.1|/0/Angiopoietin-2 [Crassostrea gigas]
Unigene0007061	1108	15.1233	55.7933	1.88332	Up	0.847131	-	-	-	-	gi|762122760|ref|XP_011444344.1|/1.647e-93/PREDICTED: uncharacterized protein LOC105340138 isoform X1 [Crassostrea gigas]
Unigene0018167	1636	32.4167	107.243	1.72608	Up	0.847078	K00504|1|0.0|747|crg:105340123|peptidylglycine monooxygenase [EC:1.14.17.3];K18200|1|0.0|747|crg:105340123|peptidylamidoglycolate lyase [EC:4.3.2.5]	-	GO:0016491//oxidoreductase activity	-	gi|405963700|gb|EKC29256.1|/0/Peptidyl-glycine alpha-amidating monooxygenase A [Crassostrea gigas]
Unigene0008479	2482	15.1367	55.6667	1.87877	Up	0.847056	-	GO:0016021//integral component of membrane	-	-	gi|762137478|ref|XP_011452033.1|/1.17462e-123/PREDICTED: uncharacterized protein LOC105345549 isoform X2 [Crassostrea gigas]
Unigene0000856	263	2.88333	17.8633	2.63119	Up	0.846183	-	-	-	-	-
Unigene0032988	518	92.06	283.697	1.6237	Up	0.845974	-	-	-	-	-
Unigene0007578	649	63.2733	196.997	1.6385	Up	0.845958	-	-	-	-	gi|762141673|ref|XP_011454029.1|/1.05475e-26/PREDICTED: uncharacterized protein LOC105346936 isoform X2 [Crassostrea gigas]
Unigene0016565	2056	66.17	204.28	1.6263	Up	0.845229	K04194|1|4e-79|298|crg:105332602|cholecystokinin A receptor;K04239|3|6e-38|161|crg:105319314|hypocretin (orexin) receptor 2;K04145|5|2e-36|156|lgi:LOTGIDRAFT_229072|dopamine receptor D2	-	-	-	gi|762160376|ref|XP_011418403.1|/0/PREDICTED: 5-hydroxytryptamine receptor 1-like [Crassostrea gigas]
Unigene0007269	462	3.41	19.47	2.51341	Up	0.845149	-	-	-	-	-
Unigene0005900	290	3.67	20.03	2.44831	Up	0.8448	K07819|1|5e-23|108|crg:105319705|beta-1,3-galactosyltransferase 1 [EC:2.4.1.-]	-	-	-	gi|762125536|ref|XP_011445796.1|/1.7311e-42/PREDICTED: beta-1,3-galactosyltransferase 5-like [Crassostrea gigas]
Unigene0023012	964	7.14333	30.21	2.08036	Up	0.844629	-	GO:0016021//integral component of membrane	-	-	gi|762169832|ref|XP_011423327.1|/5.54658e-60/PREDICTED: uncharacterized protein LOC105325453 [Crassostrea gigas]
Unigene0022434	1020	1.33	13.1433	3.30483	Up	0.844441	-	-	-	-	-
Unigene0000734	314	7.56	31.1933	2.04478	Up	0.844168	-	-	-	-	-
Unigene0028238	579	54.3533	168.123	1.62908	Up	0.843959	K08753|1|6e-16|85.9|pon:100453823|fatty acid-binding protein 4, adipocyte;K08752|5|1e-15|84.7|cmk:103180750|fatty acid-binding protein 3, muscle and heart	-	-	-	gi|405949998|gb|EKC18007.1|/5.51452e-65/Fatty acid-binding protein, adipocyte [Crassostrea gigas]
Unigene0009267	240	10.5067	40.85	1.95903	Up	0.843573	K06491|1|5e-35|147|crg:105339031|neural cell adhesion molecule	-	-	-	gi|762119644|ref|XP_011442735.1|/5.03754e-34/PREDICTED: neural cell adhesion molecule 2-like [Crassostrea gigas]
Unigene0014975	2854	9.47667	37.4133	1.9811	Up	0.843295	K02354|1|0.0|1148|crg:105334062|frizzled 4	GO:0016021//integral component of membrane;GO:0016020//membrane;GO:0044464	GO:0042813//Wnt-activated receptor activity;GO:0046983//protein dimerization activity;GO:0004888//transmembrane signaling receptor activity	GO:0016055//Wnt signaling pathway;GO:0007275//multicellular organism development;GO:0006351//transcription, DNA-templated;GO:0031325//positive regulation of cellular metabolic process;GO:0080090//regulation of primary metabolic process;GO:0007155//cell adhesion;GO:0016055//Wnt signaling pathway;GO:0010604;GO:0044093;GO:0009966//regulation of signal transduction;GO:0030154//cell differentiation;GO…	gi|762106156|ref|XP_011435663.1|/0/PREDICTED: frizzled-4-like [Crassostrea gigas]
Unigene0027256	638	3.04333	18.1133	2.57333	Up	0.843257	-	-	-	-	-
Unigene0012217	271	12.51	46.35	1.88949	Up	0.842957	-	-	-	-	gi|405968997|gb|EKC34013.1|/4.91733e-42/Fatty acid-binding protein, heart [Crassostrea gigas]
Unigene0008991	2848	4.11667	20.8067	2.3375	Up	0.84233	K05456|1|2e-172|609|crg:105345771|neuregulin 2	-	-	-	gi|762138103|ref|XP_011452362.1|/1.364e-171/PREDICTED: pro-neuregulin-1, membrane-bound isoform-like isoform X3 [Crassostrea gigas]
Unigene0014713	3073	249.183	747.437	1.58474	Up	0.84165	K13624|1|0.0|1686|crg:105346251|ceruloplasmin [EC:1.16.3.1]	-	-	-	gi|762139414|ref|XP_011453056.1|/0/PREDICTED: hephaestin-like protein [Crassostrea gigas]
Unigene0000735	275	13.41	48.39	1.8514	Up	0.841414	-	-	-	-	-
Unigene0010955	569	2.33	15.7433	2.75634	Up	0.841312	K07967|1|2e-31|137|crg:105321834|beta-1,4-galactosyltransferase 2 [EC:2.4.1.22 2.4.1.90 2.4.1.38 2.4.1.-];K07966|2|5e-12|72.8|cin:100175041|beta-1,4-galactosyltransferase 1 [EC:2.4.1.22 2.4.1.90 2.4.1.38 2.4.1.-];K07968|5|9e-08|58.5|xla:496041|beta-1,4-galactosyltransferase 3 [EC:2.4.1.90 2.4.1.38 2.4.1.-]	-	-	-	gi|405955102|gb|EKC22344.1|/9.81941e-35/Beta-1,4-N-acetylgalactosaminyltransferase bre-4 [Crassostrea gigas]
Unigene0010461	439	7.94667	31.8733	2.00393	Up	0.840867	-	-	-	-	gi|762103410|ref|XP_011434224.1|/9.44749e-17/PREDICTED: uncharacterized protein LOC105333099 isoform X2 [Crassostrea gigas]
Unigene0014953	2864	42.87	132.023	1.62275	Up	0.840824	K08889|1|2e-12|77.4|acs:100554562|tyrosine-protein kinase Fer [EC:2.7.10.2]	-	-	-	gi|762105143|ref|XP_011435129.1|/0/PREDICTED: breast cancer anti-estrogen resistance protein 3-like isoform X1 [Crassostrea gigas]
Unigene0018056	1649	22.2267	73.18	1.71916	Up	0.840674	K04565|1|3e-21|105|crg:105324007|superoxide dismutase, Cu-Zn family [EC:1.15.1.1];K16627|2|1e-12|77.0|cmk:103173882|superoxide dismutase, Cu-Zn family [EC:1.15.1.1]	-	GO:0003824//catalytic activity	GO:0008152//metabolic process	gi|405974349|gb|EKC39002.1|/0/Extracellular superoxide dismutase [Cu-Zn] [Crassostrea gigas]
Unigene0022695	989	37.96	117.403	1.62892	Up	0.840503	-	-	-	-	gi|762170333|ref|XP_011423591.1|/4.21827e-119/PREDICTED: uncharacterized protein LOC105325633 [Crassostrea gigas]
Unigene0005207	1761	2.31333	15.5267	2.7467	Up	0.840117	-	-	-	-	-
Unigene0000993	397	2.92	17.2033	2.55865	Up	0.839512	K18744|1|3e-11|68.9|dre:407729|caprin-2	-	-	-	gi|405977755|gb|EKC42189.1|/1.94751e-54/Caprin-2 [Crassostrea gigas]
Unigene0025671	744	1.94667	14.28	2.87492	Up	0.839281	K16353|1|3e-16|87.4|crg:105342949|protein sidekick;K05636|2|6e-07|56.6|mde:101887411|laminin, beta 1;K10421|3|5e-06|53.5|bmor:101739189|CAP-Gly domain-containing linker protein 1	-	-	-	gi|405971024|gb|EKC35882.1|/3.25806e-117/Multimerin-1 [Crassostrea gigas]
Unigene0018842	1500	5.13667	23.43	2.18945	Up	0.839142	-	-	-	-	gi|762111838|ref|XP_011438642.1|/1.94479e-109/PREDICTED: protein FAM167A-like [Crassostrea gigas]
Unigene0013479	16361	10.2433	38.57	1.91279	Up	0.838713	K14462|1|3e-107|395|hmg:100199505|apolipoprotein B	-	-	-	gi|762076739|ref|XP_011447122.1|/0/PREDICTED: uncharacterized protein LOC105342035, partial [Crassostrea gigas]
Unigene0003850	1791	11.3867	41.2033	1.85542	Up	0.837561	K04727|1|2e-10|52.0|nve:NEMVE_v1g79630|programmed cell death 8 (apoptosis-inducing factor) [EC:1.-.-.-]	-	-	-	gi|405952521|gb|EKC20321.1|/4.47927e-144/Apoptosis-inducing factor 3 [Crassostrea gigas]
Unigene0022089	1056	69.5267	207.41	1.57685	Up	0.837545	K04611|1|2e-48|195|nvi:100115971|metabotropic X receptor;K04603|3|4e-46|187|dre:100150246|metabotropic glutamate receptor 1;K04608|4|4e-46|187|phi:102110564|metabotropic glutamate receptor 6/7/8	-	-	-	gi|762107145|ref|XP_011436170.1|/0/PREDICTED: metabotropic glutamate receptor 4-like [Crassostrea gigas]
Unigene0003763	2421	53.53	161.063	1.58921	Up	0.836934	K10442|1|0.0|555|crg:105338993|kelch-like protein 1/4/5	-	-	-	gi|405950323|gb|EKC18318.1|/0/Kelch-like protein 5, partial [Crassostrea gigas]
Unigene0028641	555	11.27	40.5333	1.84662	Up	0.836447	-	-	-	-	gi|405970312|gb|EKC35227.1|/3.64756e-20/Alpha-N-acetylgalactosaminidase [Crassostrea gigas]
Unigene0028694	540	1.84333	13.6167	2.88498	Up	0.835975	-	-	-	-	gi|762126032|ref|XP_011446058.1|/5.35583e-34/PREDICTED: uncharacterized protein LOC105341314 [Crassostrea gigas]
Unigene0027723	608	3.25667	17.3367	2.41236	Up	0.834807	-	-	-	-	-
Unigene0020505	1243	21.1367	66.7967	1.66003	Up	0.834325	K02432|1|4e-135|483|crg:105324307|frizzled 1/7	-	-	-	gi|762166725|ref|XP_011421677.1|/2.99259e-134/PREDICTED: frizzled-7-A-like [Crassostrea gigas]
Unigene0026166	706	2.62333	15.5533	2.56775	Up	0.833451	-	-	-	-	-
Unigene0026163	711	1.83667	13.2267	2.84829	Up	0.832814	-	-	-	-	gi|405977465|gb|EKC41916.1|/1.14422e-54/hypothetical protein CGI_10013931 [Crassostrea gigas]
Unigene0002785	2032	17.51	56.31	1.68521	Up	0.832771	K13293|1|3e-147|524|crg:105324649|cAMP-specific phosphodiesterase 4 [EC:3.1.4.53]	-	-	-	gi|762167485|ref|XP_011422073.1|/2.95136e-146/PREDICTED: LOW QUALITY PROTEIN: cAMP-specific 3',5'-cyclic phosphodiesterase 4C-like [Crassostrea gigas]
Unigene0006824	250	9.95667	35.9633	1.85279	Up	0.832385	-	-	-	-	-
Unigene0008293	935	13.3533	44.6167	1.74038	Up	0.830284	-	-	-	-	-
Unigene0014080	3926	128.583	373.987	1.54028	Up	0.829941	K06061|1|0.0|1127|crg:105338996|mastermind	GO:0016607//nuclear speck	GO:0003713//transcription coactivator activity	GO:0045944//positive regulation of transcription from RNA polymerase II promoter;GO:0007219//Notch signaling pathway	gi|762119503|ref|XP_011442661.1|/0/PREDICTED: mediator of RNA polymerase II transcription subunit 15-like isoform X1 [Crassostrea gigas]
Unigene0032864	394	20.66	63.4533	1.61886	Up	0.829684	-	-	-	-	gi|762100753|ref|XP_011432836.1|/1.10939e-47/PREDICTED: uncharacterized protein LOC105332094 [Crassostrea gigas]
Unigene0018360	1595	3.90667	18.6233	2.2531	Up	0.829143	K05858|1|0.0|1053|crg:105343409|phosphatidylinositol phospholipase C, beta [EC:3.1.4.11]	-	-	-	gi|762131824|ref|XP_011449088.1|/0/PREDICTED: 1-phosphatidylinositol 4,5-bisphosphate phosphodiesterase beta-4-like isoform X3 [Crassostrea gigas]
Unigene0019637	1359	28.5633	85.59	1.58328	Up	0.828388	K04194|1|1e-100|369|crg:105322451|cholecystokinin A receptor	-	-	-	gi|762162446|ref|XP_011419486.1|/1.21822e-99/PREDICTED: cholecystokinin receptor-like [Crassostrea gigas]
Unigene0005022	3053	11.0667	38.0067	1.78003	Up	0.82835	K09486|1|7e-41|172|asn:102367994|hypoxia up-regulated 1;K08091|2|3e-06|57.0|shr:100928367|growth factor receptor bound protein 2-associated protein 2;K18061|3|6e-06|56.2|aga:AgaP_AGAP003366|myotubularin-related protein 5/13	-	-	-	gi|762138828|ref|XP_011452750.1|/0/PREDICTED: uncharacterized protein LOC105346009 isoform X5 [Crassostrea gigas]
Unigene0029670	494	5.90667	23.7067	2.00488	Up	0.827954	-	-	-	-	gi|405970310|gb|EKC35225.1|/1.03207e-10/hypothetical protein CGI_10019824 [Crassostrea gigas]
Unigene0019678	1358	244.113	691.557	1.5023	Up	0.827123	-	GO:0016021//integral component of membrane	-	-	gi|762148852|ref|XP_011412356.1|/2.85442e-40/PREDICTED: uncharacterized protein LOC105317410 [Crassostrea gigas]
Unigene0010195	393	1.55333	11.95	2.94357	Up	0.826651	-	-	-	-	-
Unigene0030440	396	4.51	19.72	2.12846	Up	0.826619	-	-	-	-	gi|762129968|ref|XP_011448112.1|/1.11358e-25/PREDICTED: titin-like [Crassostrea gigas]
Unigene0023837	888	7.59667	28.45	1.90499	Up	0.826298	-	-	-	-	gi|762134094|ref|XP_011450267.1|/8.0487e-108/PREDICTED: uncharacterized protein LOC105344245 [Crassostrea gigas]
Unigene0026810	662	11.1167	37.3867	1.7498	Up	0.825553	-	-	-	-	gi|762091338|ref|XP_011428064.1|/2.17863e-38/PREDICTED: uncharacterized protein LOC105328754 isoform X2 [Crassostrea gigas]
Unigene0023802	893	17.35	53.3833	1.62145	Up	0.825521	-	-	-	-	-
Unigene0015785	2370	9.23667	32.5	1.815	Up	0.825242	-	-	-	-	gi|762092989|ref|XP_011428939.1|/1.11048e-22/PREDICTED: rhophilin-2-B-like isoform X2 [Crassostrea gigas]
Unigene0005318	1575	973.66	2700.2	1.47158	Up	0.824712	-	-	-	-	-
Unigene0003851	1008	8.74	30.76	1.81535	Up	0.823742	-	-	-	-	gi|405952521|gb|EKC20321.1|/3.02876e-118/Apoptosis-inducing factor 3 [Crassostrea gigas]
Unigene0010585	1103	1.32667	11.01	3.05294	Up	0.823249	-	-	-	-	gi|762133176|ref|XP_011449785.1|/0/PREDICTED: uncharacterized protein LOC105343952 isoform X7 [Crassostrea gigas]
Unigene0003711	1634	8.97	31.3333	1.80452	Up	0.822659	K15680|1|3e-152|541|crg:105339932|corticosteroid 11-beta-dehydrogenase isozyme 1 [EC:1.1.1.146]	-	-	-	gi|762122142|ref|XP_011444015.1|/2.30362e-151/PREDICTED: hydroxysteroid 11-beta-dehydrogenase 1-like protein [Crassostrea gigas]
Unigene0012216	390	20.74	61.8733	1.5769	Up	0.822225	-	-	-	-	-
Unigene0010668	254	285.157	778.403	1.44876	Up	0.822097	-	-	-	-	gi|762087331|ref|XP_011425949.1|/2.65421e-27/PREDICTED: protein bunched, class 2/F/G isoform-like [Crassostrea gigas]
Unigene0012194	318	0.98	9.92667	3.34046	Up	0.821941	K19511|1|2e-11|69.7|lve:103068319|peroxidase [EC:1.11.1.7]	-	-	-	gi|762082986|ref|XP_011424179.1|/2.90695e-26/PREDICTED: zonadhesin-like [Crassostrea gigas]
Unigene0007963	510	9.95667	33.5633	1.75315	Up	0.821556	K05096|1|1e-84|313|crg:105348465|FMS-like tyrosine kinase 1 [EC:2.7.10.1]	-	-	-	gi|762145823|ref|XP_011456194.1|/7.80283e-84/PREDICTED: vascular endothelial growth factor receptor 1-like isoform X2 [Crassostrea gigas]
Unigene0002368	1248	25.45	75.6633	1.57193	Up	0.82132	-	-	-	-	-
Unigene0008245	3451	319.313	866.693	1.44055	Up	0.8211	K17083|1|0.0|1181|crg:105348091|kindlin 2	-	-	-	gi|762144862|ref|XP_011455701.1|/0/PREDICTED: fermitin family homolog 2-like, partial [Crassostrea gigas]
Unigene0020476	1248	0.85	9.52333	3.48593	Up	0.821089	-	-	-	-	gi|762092521|ref|XP_011428692.1|/5.7574e-77/PREDICTED: uncharacterized protein LOC105329200 isoform X4 [Crassostrea gigas]
Unigene0028051	588	7.12	25.6533	1.8492	Up	0.818437	-	-	-	-	-
Unigene0000733	299	1.96667	12.1733	2.6299	Up	0.81826	-	-	-	-	-
Unigene0028515	562	0.856667	9.35667	3.44919	Up	0.817483	K16866|1|1e-13|78.2|ocu:100008690|metalloproteinase inhibitor 3	-	-	-	gi|762129381|ref|XP_011447814.1|/1.76104e-81/PREDICTED: metalloproteinase inhibitor 4-like [Crassostrea gigas]
Unigene0032126	357	23.3067	68.5767	1.55698	Up	0.817414	-	-	-	-	-
Unigene0002484	319	17.0133	50.9567	1.58261	Up	0.817344	-	-	-	-	-
Unigene0003300	469	12.12	37.8333	1.64227	Up	0.817221	-	-	-	-	-
Unigene0032826	403	8.06333	27.9467	1.79323	Up	0.816899	-	-	-	-	-
Unigene0010983	778	96.5233	259.653	1.42764	Up	0.816696	-	-	-	-	gi|762107145|ref|XP_011436170.1|/4.28859e-56/PREDICTED: metabotropic glutamate receptor 4-like [Crassostrea gigas]
Unigene0012681	509	2.26667	12.8567	2.50387	Up	0.816337	-	-	-	-	gi|762129072|ref|XP_011447654.1|/6.94749e-24/PREDICTED: uncharacterized protein LOC105342405 [Crassostrea gigas]
Unigene0020689	1211	199.437	529.673	1.40917	Up	0.816315	K20526|1|2e-11|72.4|crg:105334847|transgelin	-	-	-	gi|405952674|gb|EKC20458.1|/1.9937e-10/Myophilin [Crassostrea gigas]
Unigene0019620	1367	27.3167	78.81	1.5286	Up	0.815372	-	-	-	-	gi|405977246|gb|EKC41705.1|/5.8045e-158/PI-PLC X domain-containing protein 3 [Crassostrea gigas]
Unigene0031178	290	32.3867	91.5633	1.49937	Up	0.814863	-	-	-	-	-
Unigene0015331	2601	32.16	90.6767	1.49546	Up	0.814659	K03132|1|7e-52|208|tsp:Tsp_01015|transcription initiation factor TFIID subunit 7	GO:0005911//cell-cell junction;GO:0016021//integral component of membrane;GO:0005921//gap junction;GO:0005886//plasma membrane	-	GO:0006811//ion transport	gi|762087498|ref|XP_011426041.1|/0/PREDICTED: innexin unc-9-like [Crassostrea gigas]
Unigene0028168	582	2.14667	12.44	2.53482	Up	0.814461	K20307|1|4e-35|149|obi:106871725|trafficking protein particle complex subunit 10	-	-	-	gi|961096254|ref|XP_014773822.1|/3.00218e-34/PREDICTED: trafficking protein particle complex subunit 10-like [Octopus bimaculoides]
Unigene0022162	1048	3.08333	14.77	2.26011	Up	0.814252	-	-	-	-	gi|762117380|ref|XP_011441544.1|/3.65424e-116/PREDICTED: uncharacterized protein LOC105338226 [Crassostrea gigas]
Unigene0031902	614	106.42	283.093	1.41151	Up	0.814236	-	-	-	-	gi|762110274|ref|XP_011437822.1|/1.16574e-29/PREDICTED: uncharacterized protein LOC105335571 [Crassostrea gigas]
Unigene0023174	950	6.00667	22.21	1.88657	Up	0.813968	-	-	-	-	gi|762165273|ref|XP_011420955.1|/9.40788e-122/PREDICTED: uncharacterized protein LOC105323596 [Crassostrea gigas]
Unigene0011667	323	2.16333	12.4167	2.52095	Up	0.813877	K00657|1|4e-20|98.6|bfo:BRAFLDRAFT_285620|diamine N-acetyltransferase [EC:2.3.1.57]	-	-	-	gi|762081214|ref|XP_011421088.1|/2.51744e-46/PREDICTED: diamine acetyltransferase 2-like isoform X2 [Crassostrea gigas]
Unigene0002367	414	71.8867	192.95	1.42443	Up	0.813652	K16060|1|1e-63|243|crg:105334814|baculoviral IAP repeat-containing protein 2/3	-	-	-	gi|762108144|ref|XP_011436696.1|/1.12258e-62/PREDICTED: baculoviral IAP repeat-containing protein 3-like [Crassostrea gigas]
Unigene0007964	4534	10.9867	34.31	1.64288	Up	0.813556	K05096|1|0.0|1999|crg:105348465|FMS-like tyrosine kinase 1 [EC:2.7.10.1]	-	-	-	gi|762145827|ref|XP_011456196.1|/0/PREDICTED: vascular endothelial growth factor receptor 1-like isoform X4 [Crassostrea gigas]
Unigene0002784	820	24.6767	71.0967	1.52663	Up	0.81347	K13293|1|4e-154|545|crg:105324649|cAMP-specific phosphodiesterase 4 [EC:3.1.4.53]	-	-	-	gi|762167485|ref|XP_011422073.1|/3.19283e-153/PREDICTED: LOW QUALITY PROTEIN: cAMP-specific 3',5'-cyclic phosphodiesterase 4C-like [Crassostrea gigas]
Unigene0026398	691	24.7067	71.01	1.52312	Up	0.812516	-	-	-	-	-
Unigene0008138	1887	115.6	302.207	1.38639	Up	0.812361	K14786|1|1e-33|147|smm:Smp_133510|protein KRI1	-	-	-	gi|405955982|gb|EKC22859.1|/0/Kyphoscoliosis peptidase [Crassostrea gigas]
Unigene0003296	1245	31.68	88.5433	1.48281	Up	0.812023	K10305|1|0.0|637|crg:105341895|F-box protein 25/32	-	-	-	gi|762127728|ref|XP_011446952.1|/1.23993e-180/PREDICTED: F-box only protein 25-like isoform X1 [Crassostrea gigas]
Unigene0001234	300	38.72	106.037	1.45341	Up	0.811616	-	-	-	-	-
Unigene0008250	382	6.19333	22.3167	1.84933	Up	0.811396	-	-	-	-	gi|762152357|ref|XP_011414179.1|/1.4224e-28/PREDICTED: sterile alpha and TIR motif-containing protein 1-like isoform X3 [Crassostrea gigas]
Unigene0011594	530	289.217	744.26	1.36366	Up	0.811241	-	-	-	-	gi|762110274|ref|XP_011437822.1|/1.06201e-92/PREDICTED: uncharacterized protein LOC105335571 [Crassostrea gigas]
Unigene0017267	1844	17.69	52.2667	1.56296	Up	0.810989	K11109|1|1e-27|127|crg:105338850|protection of telomeres protein 1	-	-	-	gi|762161774|ref|XP_011419126.1|/5.71489e-93/PREDICTED: uncharacterized protein LOC105322229 [Crassostrea gigas]
Unigene0005722	357	7.95	26.57	1.74077	Up	0.810748	-	-	-	-	-
Unigene0003762	555	27.08	76.0067	1.4889	Up	0.810635	-	-	-	-	-
Unigene0010462	326	1.55	10.6733	2.78367	Up	0.810416	-	-	-	-	-
Unigene0016397	2119	4.23	17.06	2.01189	Up	0.809971	K05858|1|0.0|828|crg:105343409|phosphatidylinositol phospholipase C, beta [EC:3.1.4.11]	-	-	-	gi|762131822|ref|XP_011449087.1|/0/PREDICTED: 1-phosphatidylinositol 4,5-bisphosphate phosphodiesterase beta-4-like isoform X2 [Crassostrea gigas]
Unigene0002366	2099	141.89	363.993	1.35914	Up	0.809681	K16060|1|0.0|935|crg:105334814|baculoviral IAP repeat-containing protein 2/3	-	-	-	gi|762108144|ref|XP_011436696.1|/0/PREDICTED: baculoviral IAP repeat-containing protein 3-like [Crassostrea gigas]
Unigene0000899	2091	10.8533	33.0367	1.60593	Up	0.808562	-	-	-	-	gi|762142824|ref|XP_011454642.1|/0/PREDICTED: enolase-phosphatase E1-like isoform X12 [Crassostrea gigas]
Unigene0019550	1373	2.06	11.6767	2.50291	Up	0.807935	K18274|1|2e-07|59.7|ptg:102967050|uromodulin	-	-	-	gi|762121344|ref|XP_011443598.1|/0/PREDICTED: von Willebrand factor D and EGF domain-containing protein-like [Crassostrea gigas]
Unigene0000450	341	12.0433	36.2367	1.58922	Up	0.807699	K20051|1|9e-51|200|crg:105318557|low-density lipoprotein receptor-related protein 4	-	-	-	gi|762152126|ref|XP_011414062.1|/8.55039e-50/PREDICTED: low-density lipoprotein receptor-related protein 4-like [Crassostrea gigas]
Unigene0033014	251	5.46667	19.9933	1.87079	Up	0.806483	-	GO:0005788//endoplasmic reticulum lumen	GO:0005509//calcium ion binding;GO:0046872//metal ion binding;GO:0005515//protein binding	GO:0031103//axon regeneration;GO:0044092//negative regulation of molecular function;GO:0010033//response to organic substance	gi|762104889|ref|XP_011434992.1|/2.93415e-34/PREDICTED: calumenin-like isoform X2 [Crassostrea gigas]
Unigene0029060	529	2.52	12.5433	2.31543	Up	0.805888	-	-	-	-	-
Unigene0006823	5504	2.98333	13.7233	2.20163	Up	0.805716	K12567|1|0.0|1045|obi:106877301|titin [EC:2.7.11.1]	-	-	-	gi|762129968|ref|XP_011448112.1|/0/PREDICTED: titin-like [Crassostrea gigas]
Unigene0027281	635	32.5033	86.8767	1.41838	Up	0.804661	K04194|1|7e-10|65.9|crg:105333540|cholecystokinin A receptor;K04207|3|3e-07|57.4|crg:105342895|neuropeptide Y receptor type 5	-	-	-	gi|405950440|gb|EKC18429.1|/1.102e-41/Dopamine D2-like receptor [Crassostrea gigas]
Unigene0026253	704	0.776667	8.29333	3.41658	Up	0.804409	K06238|1|2e-117|423|crg:105345192|collagen, type VI, alpha	-	-	-	gi|762136581|ref|XP_011451572.1|/1.34526e-116/PREDICTED: cartilage matrix protein-like [Crassostrea gigas]
Unigene0029643	494	6.79667	22.9133	1.75329	Up	0.804302	K03264|1|4e-07|55.8|crg:105348015|translation initiation factor 6;K06709|2|4e-07|55.8|crg:105346814|jumonji domain-containing protein 2 [EC:1.14.11.-];K05121|3|9e-07|54.7|bfo:BRAFLDRAFT_68888|endothelial-specific receptor tyrosine kinase [EC:2.7.10.1]	-	-	-	gi|762091336|ref|XP_011428063.1|/9.24846e-44/PREDICTED: uncharacterized protein LOC105328754 isoform X1 [Crassostrea gigas]
Unigene0000405	244	1.49333	10.0933	2.75679	Up	0.80412	K12567|1|4e-25|115|crg:105342773|titin [EC:2.7.11.1]	-	-	-	gi|762129970|ref|XP_011448113.1|/3.61853e-24/PREDICTED: titin-like [Crassostrea gigas]
Unigene0025512	754	2.21	11.6167	2.39408	Up	0.803391	-	-	-	-	-
Unigene0005905	276	1.72667	10.39	2.58913	Up	0.801569	-	-	-	-	-
Unigene0026738	670	31.08	81.8867	1.39764	Up	0.801301	K00666|1|2e-21|104|crg:105324586|fatty-acyl-CoA synthase [EC:6.2.1.-]	-	-	-	gi|762100725|ref|XP_011432822.1|/3.87381e-91/PREDICTED: 4-coumarate--CoA ligase-like 1 [Crassostrea gigas]
Unigene0020350	1265	3.14	13.6567	2.12077	Up	0.800958	K14616|1|2e-35|152|mze:101479234|cubilin	-	-	-	gi|405960648|gb|EKC26550.1|/0/Cubilin [Crassostrea gigas]
Unigene0008292	955	17.01	48.09	1.49935	Up	0.800931	-	-	-	-	-
Unigene0003471	668	14.57	42.1933	1.53401	Up	0.800144	-	-	-	-	-
Unigene0019540	1380	142.15	2.86667	-5.6319	Down	0.969061	-	-	-	-	gi|762155763|ref|XP_011415990.1|/7.31883e-84/PREDICTED: uncharacterized protein LOC105319950 [Crassostrea gigas]
Unigene0018222	1619	109.357	3.36	-5.02444	Down	0.953098	-	-	-	-	gi|762072317|ref|XP_011429732.1|/6.16568e-165/PREDICTED: uncharacterized protein LOC105329930 [Crassostrea gigas]
Unigene0028851	531	26.4167	0.276667	-6.57716	Down	0.952311	-	-	-	-	gi|762143034|ref|XP_011454755.1|/1.84544e-28/PREDICTED: uncharacterized protein LOC105347381 [Crassostrea gigas]
Unigene0018862	1493	283.8	11.8133	-4.58639	Down	0.95028	-	-	-	-	gi|762155134|ref|XP_011415661.1|/1.12582e-133/PREDICTED: uncharacterized protein LOC105319716 [Crassostrea gigas]
Unigene0009344	1431	179.46	6.97667	-4.68498	Down	0.949567	-	-	-	-	gi|762145534|ref|XP_011456041.1|/1.06225e-16/PREDICTED: uncharacterized protein LOC105348359 isoform X2 [Crassostrea gigas]
Unigene0020418	1254	269.757	11.8333	-4.51073	Down	0.947424	-	-	-	-	-
Unigene0024092	868	374.747	17.4533	-4.42434	Down	0.946572	-	-	-	-	gi|762166391|ref|XP_011421504.1|/3.65237e-81/PREDICTED: uncharacterized protein LOC105324151 [Crassostrea gigas]
Unigene0020072	1300	235.453	10.8	-4.44634	Down	0.945243	-	-	-	-	gi|762097275|ref|XP_011431200.1|/1.37845e-28/PREDICTED: uncharacterized protein LOC105330947 [Crassostrea gigas]
Unigene0026342	696	223.157	10.6533	-4.38868	Down	0.944937	-	-	-	-	gi|405945673|gb|EKC17431.1|/3.24846e-75/Natterin-1 [Crassostrea gigas]
Unigene0027301	630	119.53	5.42667	-4.46116	Down	0.942939	K07364|1|1e-16|88.6|crg:105340386|tyrosine-protein kinase Tec [EC:2.7.10.2]	-	-	-	gi|762123462|ref|XP_011444712.1|/7.86725e-16/PREDICTED: tyrosine-protein kinase Tec-like isoform X2 [Crassostrea gigas]
Unigene0029638	496	89.0533	4.14667	-4.42465	Down	0.938427	-	-	-	-	gi|762111686|ref|XP_011438563.1|/1.80383e-26/PREDICTED: uncharacterized protein LOC105336076 [Crassostrea gigas]
Unigene0025461	754	112.867	5.78333	-4.28657	Down	0.937302	-	-	-	-	gi|762132262|ref|XP_011449314.1|/5.28837e-56/PREDICTED: sarcoplasmic calcium-binding protein-like [Crassostrea gigas]
Unigene0002705	402	18.0733	0.216667	-6.38224	Down	0.932908	-	-	-	-	-
Unigene0029131	525	26.73	0.75	-5.15543	Down	0.926237	-	-	-	-	-
Unigene0025632	746	796.233	75.31	-3.40228	Down	0.92569	-	-	-	-	gi|762097275|ref|XP_011431200.1|/2.58471e-15/PREDICTED: uncharacterized protein LOC105330947 [Crassostrea gigas]
Unigene0008407	969	63.0467	3.95	-3.9965	Down	0.924243	K17895|1|1e-87|325|crg:105317751|GATA-binding protein 3	-	-	-	gi|762149676|ref|XP_011412781.1|/1.1924e-86/PREDICTED: transcription factor GATA-3-like isoform X2 [Crassostrea gigas]
Unigene0002096	953	118.753	10.79	-3.4602	Down	0.921168	-	-	-	-	-
Unigene0002097	688	119.723	11.0467	-3.43802	Down	0.919555	-	-	-	-	-
Unigene0010453	1163	59.7267	4.13667	-3.85183	Down	0.919357	K06780|1|1e-19|99.8|crg:105325033|cell adhesion molecule 3;K06467|2|2e-13|79.0|mze:101486696|CD22 antigen;K06255|5|3e-12|75.1|mze:101485911|heparan sulfate proteoglycan 2 (perlecan)	-	-	-	gi|762072596|ref|XP_011431157.1|/8.36439e-95/PREDICTED: cell adhesion molecule 3-like isoform X2 [Crassostrea gigas]
Unigene0010948	1256	391.323	47.24	-3.05028	Down	0.91776	K12230|1|2e-30|135|crg:105322295|phosphoinositide 3-kinase adapter protein 1	-	-	-	gi|762080859|ref|XP_011419299.1|/0/PREDICTED: phosphoinositide 3-kinase adapter protein 1-like isoform X2 [Crassostrea gigas]
Unigene0002099	280	132.15	13.7667	-3.26293	Down	0.917117	-	-	-	-	-
Unigene0005450	1310	129.417	13.5767	-3.25282	Down	0.916876	-	-	-	-	gi|762089558|ref|XP_011427134.1|/0/PREDICTED: uncharacterized protein LOC105328084 [Crassostrea gigas]
Unigene0010947	495	253.53	30.4267	-3.05875	Down	0.91657	-	-	-	-	gi|762080859|ref|XP_011419299.1|/6.87047e-18/PREDICTED: phosphoinositide 3-kinase adapter protein 1-like isoform X2 [Crassostrea gigas]
Unigene0027367	630	120.13	12.6433	-3.24815	Down	0.916249	-	-	-	-	gi|405975346|gb|EKC39916.1|/2.66039e-72/Uncharacterized protein CXorf65-like protein [Crassostrea gigas]
Unigene0015472	2539	1024.66	132.877	-2.94699	Down	0.91559	-	-	-	-	gi|762072466|ref|XP_011430496.1|/5.02542e-45/PREDICTED: uncharacterized threonine-rich GPI-anchored glycoprotein PJ4664.02-like [Crassostrea gigas]
Unigene0028423	567	165.46	19.26	-3.1028	Down	0.914995	-	-	-	-	gi|762166079|ref|XP_011421354.1|/8.39003e-55/PREDICTED: uncharacterized protein LOC105323990 [Crassostrea gigas]
Unigene0011880	202	105.38	11.04	-3.25479	Down	0.914989	-	-	-	-	-
Unigene0005449	1335	141.317	16.03	-3.14009	Down	0.914405	-	-	-	-	gi|405975940|gb|EKC40469.1|/1.81363e-157/hypothetical protein CGI_10008793 [Crassostrea gigas]
Unigene0005452	205	48.75	3.75	-3.70044	Down	0.912889	-	-	-	-	gi|762103092|ref|XP_011434058.1|/5.34919e-20/PREDICTED: uncharacterized protein LOC105332989 [Crassostrea gigas]
Unigene0022175	1047	39.6733	2.55333	-3.95772	Down	0.912225	-	-	-	-	gi|762150351|ref|XP_011413132.1|/1.57167e-50/PREDICTED: uncharacterized protein LOC105317989 [Crassostrea gigas]
Unigene0022561	1009	234.267	31.47	-2.8961	Down	0.912112	K10345|1|3e-135|483|crg:105318387|SPRY domain-containing SOCS box protein 3	GO:0005622//intracellular	-	GO:0035556//intracellular signal transduction	gi|405958416|gb|EKC24546.1|/2.80887e-134/SPRY domain-containing SOCS box protein 3 [Crassostrea gigas]
Unigene0027896	598	48.1333	3.80333	-3.6617	Down	0.910574	-	-	-	-	-
Unigene0000234	442	71.5133	7.62	-3.23035	Down	0.909867	-	-	-	-	-
Unigene0026507	684	89.29	10.2867	-3.11772	Down	0.909712	K16060|1|1e-28|128|crg:105323696|baculoviral IAP repeat-containing protein 2/3	-	-	-	gi|762165498|ref|XP_011421073.1|/8.29952e-28/PREDICTED: uncharacterized protein LOC105323696 isoform X4 [Crassostrea gigas]
Unigene0024047	873	401.82	58.84	-2.77168	Down	0.909508	-	-	-	GO:0006950//response to stress	gi|762136870|ref|XP_011451720.1|/8.94297e-83/PREDICTED: universal stress protein A-like protein [Crassostrea gigas]
Unigene0016956	1935	536.83	80.4433	-2.73842	Down	0.909428	K00503|1|2e-159|565|crg:105342404|dopamine beta-monooxygenase [EC:1.14.17.1]	-	-	-	gi|405978197|gb|EKC42607.1|/0/DBH-like monooxygenase protein 1 [Crassostrea gigas]
Unigene0020240	1275	51.9333	4.69	-3.469	Down	0.909379	K09323|1|5e-121|436|crg:105320487|homeobox protein aristaless-like 3;K09330|2|3e-21|105|aqu:100637124|paired mesoderm homeobox protein 2	GO:0005634//nucleus	GO:0043565//sequence-specific DNA binding	GO:0006355//regulation of transcription, DNA-templated	gi|762157167|ref|XP_011416732.1|/4.32339e-120/PREDICTED: retina and anterior neural fold homeobox protein 2-like [Crassostrea gigas]
Unigene0024777	813	44.5533	3.47	-3.68253	Down	0.908763	-	-	-	-	gi|762148947|ref|XP_011412399.1|/1.54055e-91/PREDICTED: uncharacterized protein LOC105317455 [Crassostrea gigas]
Unigene0006741	3032	378.73	57.59	-2.71728	Down	0.908484	K12230|1|5e-25|119|lgi:LOTGIDRAFT_154659|phosphoinositide 3-kinase adapter protein 1	-	-	-	gi|762080865|ref|XP_011419329.1|/0/PREDICTED: uncharacterized protein LOC105322365 isoform X1 [Crassostrea gigas]
Unigene0015490	2528	497.357	77.7167	-2.67798	Down	0.908265	K04145|1|3e-59|233|crg:105327189|dopamine receptor D2;K04194|2|5e-42|175|obi:106882543|cholecystokinin A receptor;K04140|5|2e-08|64.3|dre:266752|adrenergic receptor alpha-2C	-	-	-	gi|762149356|ref|XP_011412615.1|/0/PREDICTED: alpha-2C adrenergic receptor-like [Crassostrea gigas]
Unigene0002018	236	46.6233	4.00333	-3.54178	Down	0.907386	-	-	-	-	-
Unigene0011757	653	551.66	89.72	-2.62028	Down	0.9073	-	-	-	-	-
Unigene0019760	1342	310.367	48.7933	-2.66922	Down	0.906984	K04194|1|3e-30|135|obi:106882543|cholecystokinin A receptor;K04145|2|1e-28|130|crg:105327189|dopamine receptor D2;K04239|4|8e-08|60.8|obi:106870482|hypocretin (orexin) receptor 2	-	-	-	gi|405969261|gb|EKC34243.1|/2.58582e-94/Alpha-2A adrenergic receptor [Crassostrea gigas]
Unigene0023740	900	404.747	65.43	-2.629	Down	0.906941	-	-	-	-	gi|762074175|ref|XP_011437618.1|/1.22323e-18/PREDICTED: uncharacterized protein LOC105335453 [Crassostrea gigas]
Unigene0031785	1686	111.84	15.26	-2.87361	Down	0.906754	-	-	-	-	-
Unigene0012501	277	49.33	4.55333	-3.43747	Down	0.90648	K14075|1|1e-33|126|crg:105331427|pancreatic lipase-related protein 2 [EC:3.1.1.3]	-	-	-	gi|405950172|gb|EKC18175.1|/1.2201e-32/Pancreatic lipase-related protein 2 [Crassostrea gigas]
Unigene0022750	991	111.01	15.3333	-2.85595	Down	0.906443	K03264|1|4e-06|54.7|crg:105348015|translation initiation factor 6	-	-	-	gi|762098790|ref|XP_011431797.1|/9.3005e-58/PREDICTED: uncharacterized protein LOC105331351 isoform X1 [Crassostrea gigas]
Unigene0011265	468	211.753	32.1	-2.72174	Down	0.906304	K09266|1|2e-06|52.4|mmu:21674|sex-determining region Y protein (SOX group A);K18808|4|4e-06|52.4|lgi:LOTGIDRAFT_162138|toll-like receptor 13;K04650|5|4e-06|52.4|dpe:Dper_GL13148|nuclear receptor co-repressor 1	-	-	-	gi|734649122|ref|XP_010753827.1|/5.71682e-18/PREDICTED: NADH-ubiquinone oxidoreductase chain 5-like [Larimichthys crocea]
Unigene0005451	772	107.427	15.0033	-2.84	Down	0.905773	-	-	-	-	gi|762089558|ref|XP_011427134.1|/2.41748e-104/PREDICTED: uncharacterized protein LOC105328084 [Crassostrea gigas]
Unigene0002098	445	85.74	10.8833	-2.97785	Down	0.905553	-	-	-	-	-
Unigene0009269	236	56.5533	6.15333	-3.20017	Down	0.905296	K06491|1|8e-31|134|crg:105339031|neural cell adhesion molecule	-	-	-	gi|762119644|ref|XP_011442735.1|/7.56012e-30/PREDICTED: neural cell adhesion molecule 2-like [Crassostrea gigas]
Unigene0033243	1247	147.53	21.7033	-2.76502	Down	0.905114	-	-	-	-	gi|762168546|ref|XP_011422652.1|/1.14202e-16/PREDICTED: dimethylaniline monooxygenase [N-oxide-forming] 2-like [Crassostrea gigas]
Unigene0020305	1270	397.953	66.6267	-2.57843	Down	0.905055	K06238|1|3e-10|68.9|crg:105342774|collagen, type VI, alpha;K06560|3|8e-08|60.8|sko:102801348|mannose receptor, C type	-	-	-	gi|405958898|gb|EKC24981.1|/1.07785e-179/C3 and PZP-like alpha-2-macroglobulin domain-containing protein 8 [Crassostrea gigas]
Unigene0002101	261	35.7367	2.65667	-3.74972	Down	0.904894	-	-	-	-	-
Unigene0003520	406	140	20.68	-2.75912	Down	0.904584	-	-	-	-	-
Unigene0009202	2104	135.9	20.5333	-2.72651	Down	0.903753	K14616|1|1e-21|107|bfo:BRAFLDRAFT_143777|cubilin	-	-	-	gi|762154713|ref|XP_011415436.1|/0/PREDICTED: neuropilin-1-like [Crassostrea gigas]
Unigene0017464	1797	542.01	92.5567	-2.54991	Down	0.903024	K18398|1|0.0|796|crg:105327746|ectonucleotide pyrophosphatase/phosphodiesterase family member 5 [EC:3.1.-.-]	-	-	-	gi|405975777|gb|EKC40323.1|/0/Ectonucleotide pyrophosphatase/phosphodiesterase family member 5 [Crassostrea gigas]
Unigene0029520	501	39.2667	3.34333	-3.55395	Down	0.902912	-	-	-	-	gi|405967899|gb|EKC33018.1|/6.82887e-21/hypothetical protein CGI_10013646 [Crassostrea gigas]
Unigene0002016	420	1068.78	186.37	-2.51973	Down	0.902751	-	-	-	-	gi|762074175|ref|XP_011437618.1|/4.45497e-19/PREDICTED: uncharacterized protein LOC105335453 [Crassostrea gigas]
Unigene0025422	762	709.763	122.85	-2.53044	Down	0.902735	-	-	-	-	gi|762074175|ref|XP_011437618.1|/7.32227e-21/PREDICTED: uncharacterized protein LOC105335453 [Crassostrea gigas]
Unigene0003519	689	70.41	9.16667	-2.94131	Down	0.902038	-	-	-	-	-
Unigene0033354	251	493.637	86.6233	-2.51062	Down	0.901797	-	-	-	-	-
Unigene0016659	2028	31.9233	2.30333	-3.79282	Down	0.90161	K13988|1|1e-66|257|hmg:100209169|ADP-ribose pyrophosphatase [EC:3.6.1.13]	-	-	GO:0006810//transport	gi|762101578|ref|XP_011433273.1|/0/PREDICTED: transient receptor potential cation channel subfamily M member 2-like isoform X7 [Crassostrea gigas]
Unigene0006285	412	111.383	17.18	-2.69673	Down	0.901492	K05631|1|4e-26|118|soc:105199817|atrophin-1 interacting protein 3 (BAI1-associated protein 1);K00485|2|1e-18|93.6|dme:Dmel_CG3006|dimethylaniline monooxygenase (N-oxide forming) [EC:1.14.13.8]	-	GO:0016709//oxidoreductase activity, acting on paired donors, with incorporation or reduction of molecular oxygen, NAD(P)H as one donor, and incorporation of one atom of oxygen;GO:0000166//nucleotide binding;GO:0050660//flavin adenine dinucleotide binding;GO:0004499//N,N-dimethylaniline monooxygenase activity;GO:0050661//NADP binding	GO:0044710;GO:0055114//oxidation-reduction process	gi|405960209|gb|EKC26150.1|/1.09011e-65/Flavin-containing monooxygenase FMO GS-OX3 [Crassostrea gigas]
Unigene0019954	1313	137.783	22.5667	-2.61014	Down	0.90146	-	-	GO:0043565//sequence-specific DNA binding;GO:0003700//transcription factor activity, sequence-specific DNA binding	GO:0006355//regulation of transcription, DNA-templated	gi|762114196|ref|XP_011439871.1|/3.20707e-41/PREDICTED: cyclic AMP-dependent transcription factor ATF-3-like [Crassostrea gigas]
Unigene0011879	879	104.967	16.04	-2.71019	Down	0.901122	-	-	-	-	gi|405954620|gb|EKC22010.1|/4.16586e-64/hypothetical protein CGI_10002949 [Crassostrea gigas]
Unigene0027088	648	36.92	3.18	-3.5373	Down	0.900988	K18032|1|1e-29|131|crg:105348579|receptor-type tyrosine-protein phosphatase A [EC:3.1.3.48];K05695|5|2e-26|120|crg:105332268|receptor-type tyrosine-protein phosphatase F [EC:3.1.3.48]	-	-	-	gi|762118733|ref|XP_011442256.1|/1.08142e-55/PREDICTED: multiple epidermal growth factor-like domains protein 10 [Crassostrea gigas]
Unigene0002017	546	144.01	23.91	-2.59048	Down	0.900774	-	-	-	-	gi|405977709|gb|EKC42145.1|/1.17241e-07/Tyrosine-protein phosphatase non-receptor type 11 [Crassostrea gigas]
Unigene0028912	538	26.3833	1.59333	-4.04951	Down	0.900581	K04980|1|7e-31|135|mze:101469492|transient receptor potential cation channel subfamily M member 5	-	-	-	gi|762101578|ref|XP_011433273.1|/8.23402e-88/PREDICTED: transient receptor potential cation channel subfamily M member 2-like isoform X7 [Crassostrea gigas]
Unigene0001010	909	114.22	18.3	-2.6419	Down	0.900538	K16060|1|9e-75|273|crg:105331304|baculoviral IAP repeat-containing protein 2/3	-	-	-	gi|762098673|ref|XP_011431733.1|/7.23047e-74/PREDICTED: baculoviral IAP repeat-containing protein 7-like [Crassostrea gigas]
Unigene0002706	302	39.56	3.87333	-3.35239	Down	0.899831	-	-	-	-	-
Unigene0006284	840	189.123	32.42	-2.54437	Down	0.899343	K05631|1|2e-43|178|soc:105199817|atrophin-1 interacting protein 3 (BAI1-associated protein 1);K00485|2|2e-31|138|dme:Dmel_CG3006|dimethylaniline monooxygenase (N-oxide forming) [EC:1.14.13.8]	-	GO:0016491//oxidoreductase activity;GO:0016491//oxidoreductase activity	-	gi|762168546|ref|XP_011422652.1|/5.14804e-154/PREDICTED: dimethylaniline monooxygenase [N-oxide-forming] 2-like [Crassostrea gigas]
Unigene0007683	259	49.7933	5.97	-3.06015	Down	0.898839	-	-	-	-	-
Unigene0011881	381	81.1833	12.0867	-2.74777	Down	0.898614	-	-	-	-	-
Unigene0007684	276	76.11	11.1433	-2.77191	Down	0.8981	K13907|1|2e-24|112|crg:105333521|cystatin-A/B	-	-	-	gi|405965724|gb|EKC31079.1|/2.28974e-23/Cystatin-A1 [Crassostrea gigas]
Unigene0001439	459	245.083	45.0533	-2.44357	Down	0.898003	-	-	-	-	gi|762103855|ref|XP_011434458.1|/2.18901e-50/PREDICTED: uncharacterized protein LOC105333255 isoform X2 [Crassostrea gigas]
Unigene0012500	435	55.4267	7.25333	-2.93386	Down	0.897382	K14075|1|4e-65|248|crg:105331427|pancreatic lipase-related protein 2 [EC:3.1.1.3];K14076|4|4e-09|62.0|lgi:LOTGIDRAFT_233162|pancreatic lipase-related protein 3 [EC:3.1.1.3]	-	-	-	gi|762098999|ref|XP_011431909.1|/3.55809e-64/PREDICTED: pancreatic lipase-related protein 2-like [Crassostrea gigas]
Unigene0016400	2119	54.9167	7.20667	-2.92984	Down	0.897237	K09057|1|2e-116|422|crg:105349084|hepatic leukemia factor;K09062|2|8e-20|101|crg:105320853|bZIP factor, other	-	-	-	gi|762147487|ref|XP_011457057.1|/1.65875e-115/PREDICTED: transcription factor VBP-like [Crassostrea gigas]
Unigene0001440	762	275.507	52.6033	-2.38886	Down	0.896948	-	-	-	-	gi|762103855|ref|XP_011434458.1|/1.06414e-112/PREDICTED: uncharacterized protein LOC105333255 isoform X2 [Crassostrea gigas]
Unigene0015524	2517	61.0533	8.68	-2.8143	Down	0.896723	-	-	-	-	gi|762157701|ref|XP_011417012.1|/0/PREDICTED: uncharacterized protein LOC105320677 isoform X1 [Crassostrea gigas]
Unigene0027120	644	81.2067	13.15	-2.62654	Down	0.896294	-	-	-	-	gi|762150115|ref|XP_011413010.1|/2.64075e-33/PREDICTED: uncharacterized protein LOC105317902 [Crassostrea gigas]
Unigene0025578	745	34.4233	3.23667	-3.41081	Down	0.896262	K00873|1|5e-30|133|crg:105328152|pyruvate kinase [EC:2.7.1.40]	-	-	-	gi|405954068|gb|EKC21603.1|/7.48555e-31/Pyruvate kinase isozymes M1/M2 [Crassostrea gigas]
Unigene0015059	2792	149.063	26.6667	-2.48282	Down	0.896208	K10360|1|3e-16|90.1|ola:101165461|myosin IX	-	-	-	gi|762081914|ref|XP_011422635.1|/0/PREDICTED: rho GTPase-activating protein 18-like [Crassostrea gigas]
Unigene0000220	524	43.13	4.96	-3.12028	Down	0.896064	-	-	-	-	-
Unigene0011266	831	72.6433	11.1833	-2.69948	Down	0.896064	-	-	-	-	gi|762152794|ref|XP_011414412.1|/1.92916e-36/PREDICTED: uncharacterized protein LOC105318823 [Crassostrea gigas]
Unigene0009476	2801	178.403	33.6067	-2.40832	Down	0.895319	K00108|1|0.0|523|crg:105347739|choline dehydrogenase [EC:1.1.99.1]	-	-	-	gi|405978093|gb|EKC42507.1|/0/Glucose dehydrogenase [acceptor] [Crassostrea gigas]
Unigene0001441	447	201.857	39.3633	-2.35841	Down	0.894478	-	-	-	-	gi|762103855|ref|XP_011434458.1|/1.17249e-51/PREDICTED: uncharacterized protein LOC105333255 isoform X2 [Crassostrea gigas]
Unigene0023794	893	68.9533	10.8733	-2.66483	Down	0.894263	-	-	-	-	gi|762115414|ref|XP_011440512.1|/8.21015e-84/PREDICTED: uncharacterized protein LOC105337482 [Crassostrea gigas]
Unigene0023902	884	40.52	4.81667	-3.07253	Down	0.893551	K04194|1|3e-56|220|crg:105333205|cholecystokinin A receptor;K04294|2|1e-30|135|crg:105347680|lysophosphatidic acid receptor 3;K04207|4|6e-23|110|crg:105342895|neuropeptide Y receptor type 5	-	-	-	gi|762103670|ref|XP_011434361.1|/2.69928e-55/PREDICTED: cholecystokinin receptor type A-like [Crassostrea gigas]
Unigene0020615	1228	39.68	4.71667	-3.07257	Down	0.892897	K03927|1|0.0|669|crg:105318868|carboxylesterase 2 [EC:3.1.1.1 3.1.1.84 3.1.1.56];K07378|5|1e-36|156|lgi:LOTGIDRAFT_169333|neuroligin	-	-	-	gi|762079946|ref|XP_011414472.1|/0/PREDICTED: uncharacterized protein LOC105318868 [Crassostrea gigas]
Unigene0022738	992	44.6067	5.73667	-2.95897	Down	0.892817	-	-	-	-	-
Unigene0013959	4191	102.533	18.44	-2.47518	Down	0.892779	-	-	-	-	gi|405960178|gb|EKC26121.1|/2.98194e-08/Rho GTPase-activating protein 18 [Crassostrea gigas]
Unigene0024661	818	33.3933	3.61333	-3.20816	Down	0.891622	-	-	-	-	-
Unigene0007681	302	54.67	8.13667	-2.74824	Down	0.891568	-	-	-	-	gi|405956097|gb|EKC22912.1|/2.7646e-08/hypothetical protein CGI_10001198 [Crassostrea gigas]
Unigene0006742	282	79.1733	13.66	-2.53506	Down	0.891075	-	-	-	-	-
Unigene0026908	659	235.277	47.5933	-2.30553	Down	0.890963	-	-	-	-	gi|762151043|ref|XP_011413498.1|/9.57379e-71/PREDICTED: uncharacterized protein LOC105318220 isoform X2 [Crassostrea gigas]
Unigene0028101	586	21.31	1.32333	-4.00928	Down	0.890866	K06468|1|6e-29|129|crg:105334638|Fc receptor, IgE, low affinity II	-	-	-	gi|762086086|ref|XP_011425307.1|/2.5041e-84/PREDICTED: perlucin-like [Crassostrea gigas]
Unigene0028173	582	38.15	4.75667	-3.00366	Down	0.890604	K11253|1|4e-70|265|tru:101070785|histone H3	GO:0000228//nuclear chromosome;GO:0000785//chromatin	GO:0003676//nucleic acid binding;GO:0046983//protein dimerization activity	GO:0007417//central nervous system development;GO:0001503//ossification;GO:0007126//meiotic nuclear division;GO:0022610//biological adhesion;GO:0022604//regulation of cell morphogenesis;GO:0009719;GO:0030154//cell differentiation;GO:0007599//hemostasis;GO:0034728//nucleosome organization	gi|955528840|ref|XP_014647200.1|/2.87433e-69/PREDICTED: histone H3 [Ceratotherium simum simum]
Unigene0019119	1448	23	1.57667	-3.86668	Down	0.890502	K04977|1|2e-66|230|cmk:103176832|transient receptor potential cation channel subfamily M member 2 [EC:3.6.1.13]	-	-	-	gi|762101572|ref|XP_011433270.1|/0/PREDICTED: transient receptor potential cation channel subfamily M member 2-like isoform X4 [Crassostrea gigas]
Unigene0011532	525	105.247	20.1333	-2.38612	Down	0.890405	-	-	-	-	-
Unigene0008408	2301	25.51	2.11333	-3.59347	Down	0.889837	K17895|1|2e-107|392|crg:105317751|GATA-binding protein 3;K17894|2|4e-57|225|isc:IscW_ISCW004992|GATA-binding protein 2	-	-	-	gi|762149676|ref|XP_011412781.1|/2.03659e-106/PREDICTED: transcription factor GATA-3-like isoform X2 [Crassostrea gigas]
Unigene0009475	460	101.477	19.5267	-2.37763	Down	0.889655	K00108|1|9e-53|207|crg:105347739|choline dehydrogenase [EC:1.1.99.1]	-	-	-	gi|405978093|gb|EKC42507.1|/2.11532e-53/Glucose dehydrogenase [acceptor] [Crassostrea gigas]
Unigene0001450	215	186.447	37.9533	-2.29646	Down	0.88906	-	-	-	-	-
Unigene0006286	454	47.95	7.01333	-2.77336	Down	0.888942	-	-	-	-	-
Unigene0007738	287	216.05	44.7767	-2.27055	Down	0.888107	-	-	-	-	gi|762074175|ref|XP_011437618.1|/7.59588e-14/PREDICTED: uncharacterized protein LOC105335453 [Crassostrea gigas]
Unigene0027391	629	56.7033	9.49667	-2.57794	Down	0.888005	K06776|1|5e-43|176|crg:105330583|receptor-type tyrosine-protein phosphatase kappa [EC:3.1.3.48];K13297|2|1e-42|174|crg:105344922|receptor-type tyrosine-protein phosphatase T [EC:3.1.3.48]	-	-	-	gi|762112789|ref|XP_011439139.1|/1.35686e-92/PREDICTED: uncharacterized protein LOC105336492 [Crassostrea gigas]
Unigene0004267	323	661.133	145.483	-2.18409	Down	0.887973	-	-	-	-	-
Unigene0012685	377	15.7067	0.683333	-4.52264	Down	0.887533	-	-	-	-	-
Unigene0004081	902	68.27	12.1333	-2.49228	Down	0.88718	-	-	-	-	-
Unigene0013385	226	38.91	5.44333	-2.83758	Down	0.886681	-	-	-	-	gi|762103581|ref|XP_011434315.1|/1.86583e-33/PREDICTED: exoskeleton protein RP43-like isoform X4 [Crassostrea gigas]
Unigene0033242	1625	123.107	24.7767	-2.31285	Down	0.886622	-	GO:0016021//integral component of membrane	-	-	gi|762085399|ref|XP_011425011.1|/3.32392e-113/PREDICTED: uncharacterized protein LOC105326582 [Crassostrea gigas]
Unigene0004050	367	563.747	127.803	-2.14112	Down	0.885856	K04261|1|6e-50|197|crg:105344091|prostaglandin E receptor 4	-	-	-	gi|405952363|gb|EKC20184.1|/5.42675e-49/Prostaglandin E2 receptor EP4 subtype [Crassostrea gigas]
Unigene0004051	587	200.923	44.29	-2.18159	Down	0.884388	K04261|1|4e-65|249|crg:105344091|prostaglandin E receptor 4	-	-	-	gi|405952363|gb|EKC20184.1|/2.87839e-64/Prostaglandin E2 receptor EP4 subtype [Crassostrea gigas]
Unigene0030866	549	195.223	43.0367	-2.18149	Down	0.884195	K09106|1|9e-64|137|crg:105325006|upstream stimulatory factor	-	-	-	gi|762168500|ref|XP_011422627.1|/5.9887e-69/PREDICTED: upstream stimulatory factor 2-like isoform X3 [Crassostrea gigas]
Unigene0001012	432	126.897	26.9233	-2.23673	Down	0.883273	K16060|1|1e-56|219|crg:105320825|baculoviral IAP repeat-containing protein 2/3	-	-	-	gi|762158102|ref|XP_011417219.1|/1.35521e-55/PREDICTED: baculoviral IAP repeat-containing protein 3-like [Crassostrea gigas]
Unigene0011531	593	129.947	27.9267	-2.2182	Down	0.882855	K09032|1|3e-06|53.9|sko:100375938|activating transcription factor 3	-	-	-	gi|762116113|ref|XP_011440881.1|/4.93426e-43/PREDICTED: transcription factor jun-B-like [Crassostrea gigas]
Unigene0017828	1709	38.39	5.62333	-2.77123	Down	0.88278	K06085|1|1e-07|60.8|nve:NEMVE_v1g242105|synovial sarcoma, X breakpoint 2 interacting protein	-	-	-	gi|405974538|gb|EKC39173.1|/2.0209e-105/Tctex1 domain-containing protein 1 [Crassostrea gigas]
Unigene0019330	1416	102.593	21.16	-2.27753	Down	0.8827	K14662|1|2e-178|627|crg:105335781|protein N-terminal asparagine amidohydrolase [EC:3.5.1.-]	-	-	-	gi|762110931|ref|XP_011438169.1|/4.79004e-179/PREDICTED: protein N-terminal asparagine amidohydrolase-like isoform X2 [Crassostrea gigas]
Unigene0029834	482	145.47	32.1933	-2.17589	Down	0.882255	-	-	-	-	-
Unigene0025011	793	95.1367	19.7467	-2.26839	Down	0.881318	K06776|1|1e-54|215|crg:105330583|receptor-type tyrosine-protein phosphatase kappa [EC:3.1.3.48]	-	-	-	gi|762111949|ref|XP_011438701.1|/2.08141e-130/PREDICTED: multiple epidermal growth factor-like domains protein 10 [Crassostrea gigas]
Unigene0022831	981	55.4433	10.3167	-2.42604	Down	0.881312	-	-	-	-	gi|762110387|ref|XP_011437885.1|/3.89386e-109/PREDICTED: uncharacterized protein LOC105335609, partial [Crassostrea gigas]
Unigene0021553	1115	240.607	56.67	-2.08602	Down	0.880996	K07911|1|4e-115|417|crg:105318860|Ras-related protein Rab-20	GO:0005622//intracellular	GO:0005525//GTP binding;GO:0032550	GO:0007264//small GTPase mediated signal transduction;GO:0035556//intracellular signal transduction	gi|405976186|gb|EKC40702.1|/1.30742e-114/Ras-related protein Rab-20 [Crassostrea gigas]
Unigene0007737	261	206.673	48.18	-2.10085	Down	0.88075	-	-	-	-	gi|405977709|gb|EKC42145.1|/1.40776e-12/Tyrosine-protein phosphatase non-receptor type 11 [Crassostrea gigas]
Unigene0015389	2575	31.69	4.35	-2.86494	Down	0.880519	K06051|1|0.0|988|crg:105317289|delta;K02599|2|4e-59|232|crg:105331739|Notch	-	-	-	gi|762148545|ref|XP_011412197.1|/0/PREDICTED: protein serrate-like [Crassostrea gigas]
Unigene0008982	2287	139.277	31.4267	-2.14789	Down	0.880498	K02175|1|0.0|659|crg:105334278|putative enzyme (brainiac)	-	-	-	gi|762106725|ref|XP_011435958.1|/0/PREDICTED: beta-1,3-galactosyltransferase brn-like [Crassostrea gigas]
Unigene0003921	843	109.24	23.8	-2.19847	Down	0.88038	K09106|1|5e-88|326|crg:105325006|upstream stimulatory factor	-	-	-	gi|762168502|ref|XP_011422628.1|/4.18532e-87/PREDICTED: upstream stimulatory factor 2-like isoform X4 [Crassostrea gigas]
Unigene0002100	503	27.1	3.19333	-3.08516	Down	0.880171	-	-	-	-	-
Unigene0001620	1220	93.92	19.91	-2.23794	Down	0.880042	K19951|1|5e-10|68.2|xma:102236023|TBC1 domain family member 9;K20166|5|2e-09|66.2|crg:105345077|TBC1 domain family member 2B	-	-	-	gi|762120514|ref|XP_011443184.1|/0/PREDICTED: TBC1 domain family member 24-like isoform X2 [Crassostrea gigas]
Unigene0016501	2085	82.6933	17.21	-2.26452	Down	0.879067	K08331|1|0.0|884|crg:105322922|autophagy-related protein 13	-	-	-	gi|405968473|gb|EKC33543.1|/0/Autophagy-related protein 13 [Crassostrea gigas]
Unigene0009415	1615	176.2	41.65	-2.08083	Down	0.878858	K17902|1|0.0|813|crg:105337562|TBC1 domain family member 4	-	-	-	gi|762115649|ref|XP_011440634.1|/0/PREDICTED: TBC1 domain family member 1-like isoform X1 [Crassostrea gigas]
Unigene0025774	736	694.593	172.763	-2.00737	Down	0.87881	-	-	-	-	-
Unigene0023288	934	26.1633	3.08	-3.08654	Down	0.878628	K13047|1|2e-19|99.0|tup:102478657|tolloid-like protein 2 [EC:3.4.24.-]	-	-	-	gi|762103579|ref|XP_011434314.1|/1.3501e-140/PREDICTED: tolloid-like protein 2 isoform X3 [Crassostrea gigas]
Unigene0012061	667	260.757	64	-2.02656	Down	0.878628	K06261|1|5e-10|66.6|ssc:100515052|platelet glycoprotein Ib alpha chain	-	-	-	gi|597763413|ref|XP_007245649.1|/9.41478e-21/PREDICTED: integumentary mucin C.1-like [Astyanax mexicanus]
Unigene0009947	2499	140.677	32.68	-2.1059	Down	0.878526	K18470|1|0.0|816|crg:105326503|Rho GTPase-activating protein 1	-	-	-	gi|762084761|ref|XP_011424880.1|/0/PREDICTED: rho GTPase-activating protein 8-like isoform X5 [Crassostrea gigas]
Unigene0012821	360	13.14	0.516667	-4.66859	Down	0.878467	-	-	-	-	-
Unigene0023001	963	21.8467	2.00667	-3.44454	Down	0.87837	-	-	GO:0043565//sequence-specific DNA binding;GO:0003700//transcription factor activity, sequence-specific DNA binding	GO:0006355//regulation of transcription, DNA-templated	gi|762142289|ref|XP_011454357.1|/4.30183e-87/PREDICTED: uncharacterized protein LOC105347143 [Crassostrea gigas]
Unigene0018883	1491	210.783	51.4033	-2.03583	Down	0.878285	K17902|1|0.0|966|crg:105337562|TBC1 domain family member 4;K18341|2|5e-153|543|xtr:733547|TBC1 domain family member 1	-	-	-	gi|762115651|ref|XP_011440636.1|/0/PREDICTED: TBC1 domain family member 1-like isoform X2 [Crassostrea gigas]
Unigene0017591	1768	176.743	42.4033	-2.05941	Down	0.878135	K04194|1|5e-22|108|crg:105317546|cholecystokinin A receptor;K04145|2|8e-22|107|lgi:LOTGIDRAFT_229072|dopamine receptor D2;K08375|5|4e-19|99.0|obi:106873254|neuropeptide FF receptor 2	-	-	-	gi|405965321|gb|EKC30703.1|/0/Carbonyl reductase [NADPH] 3 [Crassostrea gigas]
Unigene0020812	1202	26.83	3.36	-2.99731	Down	0.878113	-	-	-	-	gi|762164935|ref|XP_011420791.1|/1.07881e-16/PREDICTED: dentin sialophosphoprotein-like, partial [Crassostrea gigas]
Unigene0027675	610	50.8933	9.73333	-2.38647	Down	0.878022	-	-	-	-	-
Unigene0004054	501	145.9	34.3667	-2.0859	Down	0.877958	K04261|1|2e-38|160|crg:105344091|prostaglandin E receptor 4	-	-	-	gi|405952363|gb|EKC20184.1|/1.04867e-37/Prostaglandin E2 receptor EP4 subtype [Crassostrea gigas]
Unigene0003922	1045	81.93	17.45	-2.23116	Down	0.87777	-	-	-	-	-
Unigene0012243	636	42.0533	7.20333	-2.54548	Down	0.877743	K08630|1|3e-18|94.0|crg:105327182|a disintegrin and metalloproteinase with thrombospondin motifs 16 [EC:3.4.24.-];K08625|2|8e-18|92.4|hro:HELRODRAFT_163021|a disintegrin and metalloproteinase with thrombospondin motifs 10 [EC:3.4.24.-];K08632|3|5e-15|83.2|crg:105326325|a disintegrin and metalloproteinase with thrombospondin motifs 18 [EC:3.4.24.-]	-	-	-	gi|762091290|ref|XP_011428038.1|/4.00656e-124/PREDICTED: ADAM family mig-17-like [Crassostrea gigas]
Unigene0007083	235	178.34	43.14	-2.04753	Down	0.877738	K04194|1|9e-29|127|crg:105333205|cholecystokinin A receptor;K04207|2|6e-12|71.2|crg:105342895|neuropeptide Y receptor type 5;K04239|4|2e-06|53.1|crg:105334467|hypocretin (orexin) receptor 2;K04294|5|3e-06|52.4|crg:105347680|lysophosphatidic acid receptor 3	-	-	-	gi|405977648|gb|EKC42087.1|/7.30561e-33/Prolactin-releasing peptide receptor [Crassostrea gigas]
Unigene0024167	862	73.45	15.2367	-2.26922	Down	0.877524	-	-	-	-	-
Unigene0008120	1303	68.84	14.0933	-2.28823	Down	0.877379	-	-	-	-	gi|405968064|gb|EKC33167.1|/2.95029e-63/Inositol-trisphosphate 3-kinase B [Crassostrea gigas]
Unigene0027918	595	141.267	33.41	-2.08007	Down	0.877277	-	-	-	-	gi|762156219|ref|XP_011416233.1|/1.75904e-32/PREDICTED: uncharacterized protein LOC105320127 [Crassostrea gigas]
Unigene0009487	1821	49.5733	9.49667	-2.38407	Down	0.877181	-	-	-	-	gi|762080850|ref|XP_011419251.1|/3.3231e-69/PREDICTED: uncharacterized protein LOC105322306 [Crassostrea gigas]
Unigene0009091	1902	240.717	59.31	-2.02099	Down	0.877165	K17102|1|6e-164|580|crg:105348386|ETS homologous factor;K17101|4|2e-29|133|lgi:LOTGIDRAFT_121836|E74-like factor 5	-	-	-	gi|762145605|ref|XP_011456079.1|/5.426e-163/PREDICTED: ETS-related transcription factor Elf-3-like isoform X4 [Crassostrea gigas]
Unigene0025612	746	122.64	28.6067	-2.10001	Down	0.876875	-	-	-	-	gi|405953483|gb|EKC21137.1|/3.44506e-60/Sarcoplasmic calcium-binding protein [Crassostrea gigas]
Unigene0016222	2185	34.52	5.54667	-2.63774	Down	0.876763	-	-	-	-	gi|762155028|ref|XP_011415603.1|/0/PREDICTED: uncharacterized protein LOC105319679 [Crassostrea gigas]
Unigene0007198	312	72.2833	15.1867	-2.25086	Down	0.876399	-	-	-	-	-
Unigene0001619	492	70.61	15.01	-2.23395	Down	0.875193	-	-	-	-	gi|405967267|gb|EKC32449.1|/2.00904e-27/Protein SERAC1 [Crassostrea gigas]
Unigene0002836	310	71.16	15.3133	-2.21628	Down	0.875011	-	-	-	-	gi|762105065|ref|XP_011435086.1|/2.81535e-37/PREDICTED: coiled-coil domain-containing protein 186-like isoform X2 [Crassostrea gigas]
Unigene0024028	867	73.6167	16.2433	-2.18018	Down	0.874019	K17609|1|6e-69|263|crg:105338528|nucleoredoxin [EC:1.8.1.8];K14442|3|2e-30|135|aqu:100633205|ATP-dependent RNA helicase DHX36 [EC:3.6.4.13]	-	-	-	gi|405963782|gb|EKC29329.1|/4.63099e-68/Nucleoredoxin [Crassostrea gigas]
Unigene0030316	421	16.57	1.12	-3.887	Down	0.873628	K19721|1|4e-08|58.5|bfo:BRAFLDRAFT_97418|collagen, type V/XI/XXIV/XXVII, alpha	-	-	-	gi|762116055|ref|XP_011440850.1|/6.58033e-55/PREDICTED: uncharacterized protein LOC105337688 isoform X2 [Crassostrea gigas]
Unigene0019386	1406	75.5467	16.93	-2.15779	Down	0.873548	K13411|1|4e-136|461|bfo:BRAFLDRAFT_129071|dual oxidase [EC:1.6.3.1 1.11.1.-]	GO:0016021//integral component of membrane;GO:0031224//intrinsic component of membrane	GO:0020037//heme binding;GO:0004601//peroxidase activity;GO:0005509//calcium ion binding;GO:0046872//metal ion binding;GO:0003824//catalytic activity;GO:0016209//antioxidant activity;GO:0046906//tetrapyrrole binding	GO:0098869//cellular oxidant detoxification;GO:0055114//oxidation-reduction process;GO:0006979//response to oxidative stress;GO:0044710;GO:0006950//response to stress	gi|762107555|ref|XP_011436385.1|/7.55359e-177/PREDICTED: dual oxidase 2-like isoform X2 [Crassostrea gigas]
Unigene0025848	730	15.84	1.00667	-3.97591	Down	0.873157	-	-	-	-	-
Unigene0002837	2071	75.8733	17.0667	-2.15241	Down	0.873151	K20478|1|9e-19|58.2|dre:557772|golgin subfamily B member 1	-	-	-	gi|762105059|ref|XP_011435083.1|/8.2993e-172/PREDICTED: coiled-coil domain-containing protein 186-like isoform X1 [Crassostrea gigas]
Unigene0012062	310	306.333	77.63	-1.98042	Down	0.872717	-	-	-	-	gi|405957810|gb|EKC23991.1|/1.27258e-13/hypothetical protein CGI_10003405, partial [Crassostrea gigas]
Unigene0001304	684	30.92	5.08333	-2.60469	Down	0.871399	-	-	-	-	gi|405958746|gb|EKC24841.1|/2.82167e-99/hypothetical protein CGI_10010808 [Crassostrea gigas]
Unigene0018196	1622	23.9367	3.04	-2.97708	Down	0.871072	K07297|1|4e-18|95.5|sko:100366651|adiponectin receptor	-	-	-	gi|762076556|ref|XP_011446149.1|/0/PREDICTED: membrane progestin receptor beta-like [Crassostrea gigas]
Unigene0015392	2574	92.0267	22.42	-2.03727	Down	0.870901	K17902|1|3e-10|70.1|crg:105337562|TBC1 domain family member 4	-	-	-	gi|762115657|ref|XP_011440639.1|/2.65001e-09/PREDICTED: TBC1 domain family member 4-like isoform X5 [Crassostrea gigas]
Unigene0032170	308	76.5767	17.9	-2.09695	Down	0.870783	-	-	-	-	-
Unigene0027067	646	25.4333	3.59667	-2.82199	Down	0.870515	K06528|1|3e-100|366|crg:105336087|lysosomal-associated membrane protein 1/2	-	-	-	gi|762111703|ref|XP_011438572.1|/2.08135e-99/PREDICTED: lysosome-associated membrane glycoprotein 1-like [Crassostrea gigas]
Unigene0016179	2202	83.0667	19.9833	-2.05547	Down	0.870386	K14638|1|0.0|1052|crg:105348980|solute carrier family 15 (peptide/histidine transporter), member 3/4	GO:0016020//membrane	-	GO:0006810//transport	gi|762147203|ref|XP_011456906.1|/0/PREDICTED: solute carrier family 15 member 4-like isoform X1 [Crassostrea gigas]
Unigene0017681	1742	21.5533	2.55	-3.07934	Down	0.869684	-	-	-	-	gi|762118505|ref|XP_011442140.1|/0/PREDICTED: putative uncharacterized protein CXorf58 isoform X2 [Crassostrea gigas]
Unigene0001621	1393	49.94	10.37	-2.26778	Down	0.869658	K12587|1|6e-14|81.3|bfo:BRAFLDRAFT_124886|exosome complex component MTR3	-	-	-	gi|762120514|ref|XP_011443184.1|/3.78911e-96/PREDICTED: TBC1 domain family member 24-like isoform X2 [Crassostrea gigas]
Unigene0006048	1044	106.063	26.25	-2.01454	Down	0.869636	K06776|1|2e-81|305|crg:105346217|receptor-type tyrosine-protein phosphatase kappa [EC:3.1.3.48]	-	-	-	gi|762158340|ref|XP_011417347.1|/5.26316e-107/PREDICTED: multiple epidermal growth factor-like domains protein 11 [Crassostrea gigas]
Unigene0033224	501	63.7967	14.4467	-2.14274	Down	0.869492	-	-	-	-	-
Unigene0002069	2049	73.7833	17.4333	-2.08145	Down	0.869154	K05643|1|0.0|662|crg:105325918|ATP-binding cassette, subfamily A (ABC1), member 3	GO:0044464;GO:0016020//membrane	-	-	gi|762082396|ref|XP_011424009.1|/0/PREDICTED: ATP-binding cassette sub-family A member 3-like isoform X1 [Crassostrea gigas]
Unigene0026576	682	61.9033	14.0367	-2.14082	Down	0.86895	K13411|1|9e-55|215|bfo:BRAFLDRAFT_67691|dual oxidase [EC:1.6.3.1 1.11.1.-]	GO:0016020//membrane	GO:0016491//oxidoreductase activity;GO:0005488;GO:0003824//catalytic activity;GO:0005488	GO:0050896//response to stimulus	gi|762107555|ref|XP_011436385.1|/3.88008e-118/PREDICTED: dual oxidase 2-like isoform X2 [Crassostrea gigas]
Unigene0001885	321	95.2633	23.6	-2.01313	Down	0.868409	K16529|1|1e-43|176|crg:105319868|A-kinase anchor protein 13;K12791|3|1e-09|63.5|xla:398353|Rho guanine nucleotide exchange factor 2	-	-	-	gi|762155572|ref|XP_011415894.1|/1.29588e-42/PREDICTED: rho guanine nucleotide exchange factor 18-like isoform X18 [Crassostrea gigas]
Unigene0001623	489	49.53	10.5267	-2.23425	Down	0.867863	-	-	-	-	gi|405967267|gb|EKC32449.1|/8.44308e-34/Protein SERAC1 [Crassostrea gigas]
Unigene0020176	1286	55.9333	12.4733	-2.16486	Down	0.867734	K00432|1|1e-111|405|crg:105329785|glutathione peroxidase [EC:1.11.1.9]	-	GO:0004602//glutathione peroxidase activity;GO:0004601//peroxidase activity	GO:0098869//cellular oxidant detoxification;GO:0055114//oxidation-reduction process;GO:0006979//response to oxidative stress;GO:0006950//response to stress;GO:0044710	gi|821595222|ref|NP_001295811.1|/1.08266e-110/epididymal secretory glutathione peroxidase-like [Crassostrea gigas]
Unigene0002070	3446	74.97	18.2833	-2.03578	Down	0.867718	K05643|1|0.0|1176|crg:105324475|ATP-binding cassette, subfamily A (ABC1), member 3	-	-	-	gi|405945282|gb|EKC17257.1|/0/ATP-binding cassette sub-family A member 3 [Crassostrea gigas]
Unigene0006728	2703	33.83	6.34333	-2.41499	Down	0.86677	K10461|1|0.0|1122|crg:105339652|kelch-like protein 24/35	-	-	-	gi|762121334|ref|XP_011443593.1|/0/PREDICTED: kelch-like protein 24 [Crassostrea gigas]
Unigene0017089	1902	306.76	82.5933	-1.89301	Down	0.866421	K07418|1|3e-53|212|crg:105324861|cytochrome P450, family 2, subfamily J [EC:1.14.14.1];K07422|2|9e-49|197|sko:102810228|cytochrome P450, family 2, subfamily U, polypeptide 1;K07412|3|3e-48|196|ocu:100328948|cytochrome P450, family 2, subfamily B [EC:1.14.14.1];K17859|4|3e-48|195|xma:102230594|cytochrome P450, family 2, subfamily Y	-	-	-	gi|762091458|ref|XP_011428127.1|/0/PREDICTED: cytochrome P450 2C31-like isoform X1 [Crassostrea gigas]
Unigene0013384	709	25.1433	3.80667	-2.72358	Down	0.865907	K14616|1|4e-10|67.0|cfa:403767|cubilin	GO:0043231//intracellular membrane-bounded organelle;GO:0044444//cytoplasmic part	-	-	gi|762103581|ref|XP_011434315.1|/8.12429e-85/PREDICTED: exoskeleton protein RP43-like isoform X4 [Crassostrea gigas]
Unigene0026742	668	19.9433	2.37	-3.07295	Down	0.865832	-	-	-	-	gi|762092283|ref|XP_011428571.1|/3.00763e-43/PREDICTED: centrosome-associated protein CEP250-like [Crassostrea gigas]
Unigene0022595	1005	22.1067	3.05333	-2.85602	Down	0.864948	-	-	-	-	gi|762152880|ref|XP_011414458.1|/5.65654e-119/PREDICTED: uncharacterized protein LOC105318861 [Crassostrea gigas]
Unigene0010109	1429	26.1567	4.32	-2.59808	Down	0.864492	K11416|1|0.0|712|crg:105347148|mono-ADP-ribosyltransferase sirtuin 6 [EC:2.4.2.31]	-	-	-	gi|405956989|gb|EKC23228.1|/0/NAD-dependent deacetylase sirtuin-6 [Crassostrea gigas]
Unigene0003386	1200	58.6133	14.07	-2.05861	Down	0.863999	K04349|1|0.0|704|crg:105346952|Ras-specific guanine nucleotide-releasing factor 1	-	-	GO:0007264//small GTPase mediated signal transduction	gi|762141737|ref|XP_011454064.1|/0/PREDICTED: ras-specific guanine nucleotide-releasing factor 2-like isoform X3 [Crassostrea gigas]
Unigene0007082	1721	128.567	33.43	-1.9433	Down	0.86364	K04194|1|2e-69|265|crg:105333205|cholecystokinin A receptor;K04207|3|4e-13|79.0|crg:105342895|neuropeptide Y receptor type 5	-	-	-	gi|762092603|ref|XP_011428733.1|/5.76263e-92/PREDICTED: alpha-1A adrenergic receptor-like [Crassostrea gigas]
Unigene0026585	681	15.2333	1.23667	-3.6227	Down	0.863003	-	-	-	-	gi|762122896|ref|XP_011444415.1|/2.56209e-53/PREDICTED: uncharacterized protein LOC105340184 [Crassostrea gigas]
Unigene0033273	3454	212.527	58.4733	-1.86179	Down	0.862697	-	-	-	-	gi|762123505|ref|XP_011444735.1|/0/PREDICTED: uncharacterized protein LOC105340407 [Crassostrea gigas]
Unigene0025543	752	15.6933	1.34667	-3.54269	Down	0.862601	-	-	-	-	-
Unigene0001005	216	190.087	52.38	-1.85957	Down	0.862011	K16060|1|7e-37|154|crg:105323879|baculoviral IAP repeat-containing protein 2/3	-	-	-	gi|762165887|ref|XP_011421261.1|/6.89537e-36/PREDICTED: baculoviral IAP repeat-containing protein 7-like [Crassostrea gigas]
Unigene0029689	491	49.0167	11.33	-2.11312	Down	0.861877	K04978|1|1e-53|210|crg:105333748|transient receptor potential cation channel subfamily M member 3	-	-	-	gi|762105271|ref|XP_011435198.1|/8.61411e-71/PREDICTED: transient receptor potential cation channel subfamily M member 1-like isoform X5 [Crassostrea gigas]
Unigene0020594	1230	22.0833	3.20333	-2.78531	Down	0.861599	K05202|1|0.0|644|crg:105327397|glutamate receptor, ionotropic kainate 2;K05200|2|2e-86|322|crg:105327395|glutamate receptor 4;K05201|3|9e-57|223|cfa:487719|glutamate receptor, ionotropic kainate 1	GO:0016020//membrane	GO:0005216//ion channel activity	-	gi|762087709|ref|XP_011426153.1|/0/PREDICTED: glutamate receptor ionotropic, kainate 5-like isoform X1 [Crassostrea gigas]
Unigene0026911	655	66.2667	16.54	-2.00232	Down	0.861454	K01283|1|1e-110|371|crg:105337281|peptidyl-dipeptidase A [EC:3.4.15.1]	-	GO:0008238//exopeptidase activity;GO:0008238//exopeptidase activity	GO:0019538//protein metabolic process	gi|762114871|ref|XP_011440230.1|/7.21027e-111/PREDICTED: angiotensin-converting enzyme-like isoform X1 [Crassostrea gigas]
Unigene0032878	2637	493.317	141.43	-1.80243	Down	0.861149	-	GO:0016021//integral component of membrane	-	-	gi|762072342|ref|XP_011429866.1|/0/PREDICTED: macrophage-expressed gene 1 protein-like [Crassostrea gigas]
Unigene0009988	1474	229.577	64.4033	-1.83377	Down	0.861106	K04347|1|9e-08|60.8|oaa:100081920|guanine nucleotide-binding protein G(I)/G(S)/G(O) subunit gamma-12	GO:0016020//membrane	-	-	gi|676421166|ref|XP_009043782.1|/4.96701e-09/hypothetical protein LOTGIDRAFT_152054 [Lottia gigantea]
Unigene0027809	603	28.8433	5.39333	-2.41899	Down	0.86095	-	-	-	-	-
Unigene0020023	1299	40.3267	8.77667	-2.19999	Down	0.860875	K01158|1|8e-88|326|crg:105327350|deoxyribonuclease II [EC:3.1.22.1]	-	-	-	gi|762087562|ref|XP_011426074.1|/6.50441e-87/PREDICTED: plancitoxin-1-like [Crassostrea gigas]
Unigene0001622	1967	25.9	4.4	-2.55738	Down	0.860827	-	-	-	-	-
Unigene0020205	1282	70.5	17.69	-1.99469	Down	0.860189	K01476|1|0.0|651|crg:105339545|arginase [EC:3.5.3.1]	-	GO:0016813//hydrolase activity, acting on carbon-nitrogen (but not peptide) bonds, in linear amidines	GO:1901564;GO:0044763;GO:0044281//small molecule metabolic process;GO:0044237//cellular metabolic process	gi|762121018|ref|XP_011443425.1|/0/PREDICTED: arginase, hepatic-like [Crassostrea gigas]
Unigene0003004	559	1698.48	499.577	-1.76546	Down	0.859943	K01158|1|2e-106|386|crg:105335715|deoxyribonuclease II [EC:3.1.22.1]	-	-	-	gi|762110711|ref|XP_011438052.1|/1.31424e-105/PREDICTED: plancitoxin-1-like isoform X2 [Crassostrea gigas]
Unigene0019685	1357	25.0433	4.20667	-2.57368	Down	0.859809	K08625|1|2e-33|145|hro:HELRODRAFT_163021|a disintegrin and metalloproteinase with thrombospondin motifs 10 [EC:3.4.24.-];K08630|2|3e-23|112|crg:105327182|a disintegrin and metalloproteinase with thrombospondin motifs 16 [EC:3.4.24.-];K08632|3|2e-22|109|crg:105326325|a disintegrin and metalloproteinase with thrombospondin motifs 18 [EC:3.4.24.-];K08624|4|1e-13|80.5|cel:CELE_F25H8.3|a disintegrin a…	-	-	-	gi|405969150|gb|EKC34145.1|/3.01867e-66/hypothetical protein CGI_10004147 [Crassostrea gigas]
Unigene0025500	754	8	0.143333	-5.80255	Down	0.859648	K17353|1|7e-91|335|crg:105338010|tetraspanin-18	-	-	-	gi|762116868|ref|XP_011441276.1|/5.59796e-90/PREDICTED: tetraspanin-1-like [Crassostrea gigas]
Unigene0003387	986	35.7333	7.51333	-2.24975	Down	0.859043	K04349|1|4e-165|582|crg:105346952|Ras-specific guanine nucleotide-releasing factor 1	-	-	-	gi|762141741|ref|XP_011454067.1|/3.27852e-164/PREDICTED: ras-specific guanine nucleotide-releasing factor 2-like isoform X5 [Crassostrea gigas]
Unigene0011411	491	125.83	34.5967	-1.86277	Down	0.858786	-	-	-	-	gi|762124629|ref|XP_011445333.1|/5.63554e-38/PREDICTED: uncharacterized protein LOC105340815 [Crassostrea gigas]
Unigene0006246	1272	215.36	61.7967	-1.80115	Down	0.858164	-	-	-	-	gi|762160976|ref|XP_011418706.1|/2.08308e-106/PREDICTED: uncharacterized protein LOC105321917 [Crassostrea gigas]
Unigene0008579	2030	44.7067	10.57	-2.08051	Down	0.857891	K04349|1|2e-51|206|crg:105346952|Ras-specific guanine nucleotide-releasing factor 1;K12326|3|3e-35|152|aga:AgaP_AGAP001238|Ras-specific guanine nucleotide-releasing factor 2	GO:0044464	GO:0005088//Ras guanyl-nucleotide exchange factor activity;GO:0008289//lipid binding	GO:0007266//Rho protein signal transduction	gi|762141741|ref|XP_011454067.1|/1.77571e-50/PREDICTED: ras-specific guanine nucleotide-releasing factor 2-like isoform X5 [Crassostrea gigas]
Unigene0017877	1690	34.8033	7.45333	-2.22327	Down	0.857055	-	-	-	-	gi|405954631|gb|EKC22019.1|/1.08413e-34/hypothetical protein CGI_10002943 [Crassostrea gigas]
Unigene0029697	490	10.4033	0.44	-4.5634	Down	0.856455	-	-	-	-	-
Unigene0021122	1161	37.4933	8.45333	-2.14904	Down	0.85638	K14787|1|9e-135|482|crg:105321520|multiple RNA-binding domain-containing protein 1	-	-	-	gi|405963583|gb|EKC29145.1|/4.13811e-135/Putative RNA-binding protein 19 [Crassostrea gigas]
Unigene0011410	682	68.54	17.66	-1.95646	Down	0.856208	-	-	-	-	gi|762069918|ref|XP_011413371.1|/3.96192e-46/PREDICTED: uncharacterized protein LOC105317313 isoform X2 [Crassostrea gigas]
Unigene0001884	2112	75.23	19.73	-1.93092	Down	0.855962	K16529|1|0.0|1223|crg:105319868|A-kinase anchor protein 13	-	-	-	gi|762155546|ref|XP_011415881.1|/0/PREDICTED: rho guanine nucleotide exchange factor 28-like isoform X5 [Crassostrea gigas]
Unigene0003941	908	201.763	59.4633	-1.76259	Down	0.854772	K18617|1|4e-45|184|crg:105317375|allograft inflammatory factor 1	-	-	-	gi|387598307|gb|AFJ91809.1|/9.11615e-62/allograft inflammatory factor [Ostrea edulis]
Unigene0008119	2711	151.43	44.2	-1.77653	Down	0.854226	K00911|1|0.0|638|crg:105336889|1D-myo-inositol-triphosphate 3-kinase [EC:2.7.1.127]	-	GO:0008440//inositol-1,4,5-trisphosphate 3-kinase activity	GO:0016310//phosphorylation	gi|762113817|ref|XP_011439673.1|/1.9783e-180/PREDICTED: inositol-trisphosphate 3-kinase B-like [Crassostrea gigas]
Unigene0022080	1052	33.66	7.43333	-2.17895	Down	0.854065	-	-	-	-	gi|762159001|ref|XP_011417698.1|/2.46492e-11/PREDICTED: uncharacterized protein LOC105321171 [Crassostrea gigas]
Unigene0010643	826	22.4167	3.83	-2.54916	Down	0.853824	K04565|1|2e-100|367|crg:105333669|superoxide dismutase, Cu-Zn family [EC:1.15.1.1]	-	-	-	gi|762104990|ref|XP_011435046.1|/1.5797e-99/PREDICTED: copper chaperone for superoxide dismutase-like [Crassostrea gigas]
Unigene0006057	1529	71.7567	19.2067	-1.90151	Down	0.853561	-	-	-	-	gi|762080284|ref|XP_011416157.1|/8.32228e-07/PREDICTED: SLIT-ROBO Rho GTPase-activating protein 1-like isoform X5 [Crassostrea gigas]
Unigene0008131	3674	69.6033	18.54	-1.90852	Down	0.85355	K08042|1|0.0|1094|crg:105336030|adenylate cyclase 2 [EC:4.6.1.1]	GO:0044464;GO:0016020//membrane	GO:0016849//phosphorus-oxygen lyase activity	GO:0009190//cyclic nucleotide biosynthetic process	gi|762111566|ref|XP_011438500.1|/0/PREDICTED: adenylate cyclase type 2-like [Crassostrea gigas]
Unigene0013918	4285	166.623	49.6333	-1.74721	Down	0.852913	K18809|1|3e-63|246|ame:412703|protein toll	GO:0016021//integral component of membrane	-	GO:0007165//signal transduction;GO:0007154//cell communication	gi|317374950|gb|ADV16385.1|/0/toll-like receptor 1 [Crassostrea gigas]
Unigene0032733	605	22.8933	4.09	-2.48475	Down	0.852623	-	-	-	-	gi|405958746|gb|EKC24841.1|/2.90193e-40/hypothetical protein CGI_10010808 [Crassostrea gigas]
Unigene0009417	324	36.2367	8.42667	-2.10442	Down	0.852613	-	-	-	-	gi|762115655|ref|XP_011440638.1|/6.22949e-29/PREDICTED: TBC1 domain family member 1-like isoform X4 [Crassostrea gigas]
Unigene0001438	248	36.2567	8.48	-2.09611	Down	0.852559	-	-	-	-	gi|762103855|ref|XP_011434458.1|/8.02642e-24/PREDICTED: uncharacterized protein LOC105333255 isoform X2 [Crassostrea gigas]
Unigene0030271	428	28.0167	5.68	-2.30232	Down	0.85242	-	-	-	-	gi|762138952|ref|XP_011452815.1|/1.90926e-41/PREDICTED: uncharacterized protein LOC105346061 [Crassostrea gigas]
Unigene0016216	2190	22.78	4.07	-2.48467	Down	0.852388	-	-	-	-	gi|762124522|ref|XP_011445277.1|/5.76028e-111/PREDICTED: uncharacterized protein LOC105340770 [Crassostrea gigas]
Unigene0022962	968	33.9367	7.72	-2.13617	Down	0.852248	-	-	-	-	gi|762080358|ref|XP_011416532.1|/1.30386e-08/PREDICTED: uncharacterized protein LOC105320321 [Crassostrea gigas]
Unigene0016016	2269	83.0433	23.2633	-1.83581	Down	0.852179	K04371|1|2e-06|57.4|asn:102375250|mitogen-activated protein kinase 1/3 [EC:2.7.11.24]	-	-	-	gi|762133233|ref|XP_011449815.1|/3.57782e-63/PREDICTED: protein yippee-like 1 isoform X1 [Crassostrea gigas]
Unigene0003095	535	29.9933	6.34667	-2.24057	Down	0.852082	K16727|1|3e-07|56.6|acs:103282777|Rho guanine nucleotide exchange factor 10;K20045|5|4e-07|56.2|aqu:100634299|intersectin	-	GO:0030695//GTPase regulator activity	GO:0007165//signal transduction	gi|762097308|ref|XP_011431218.1|/2.73558e-92/PREDICTED: uncharacterized protein LOC105330957 isoform X2 [Crassostrea gigas]
Unigene0003003	436	1033.72	326.537	-1.66253	Down	0.852023	K01158|1|2e-40|166|crg:105335715|deoxyribonuclease II [EC:3.1.22.1]	-	-	-	gi|762110711|ref|XP_011438052.1|/1.77819e-39/PREDICTED: plancitoxin-1-like isoform X2 [Crassostrea gigas]
Unigene0008580	887	32.34	7.18	-2.17126	Down	0.851997	K04349|1|5e-150|532|crg:105346952|Ras-specific guanine nucleotide-releasing factor 1	-	-	-	gi|762141741|ref|XP_011454067.1|/4.21858e-149/PREDICTED: ras-specific guanine nucleotide-releasing factor 2-like isoform X5 [Crassostrea gigas]
Unigene0007994	4396	58.51	15.29	-1.93609	Down	0.85168	K04978|1|0.0|1474|crg:105333748|transient receptor potential cation channel subfamily M member 3	-	-	-	gi|762105285|ref|XP_011435205.1|/0/PREDICTED: transient receptor potential cation channel subfamily M member 1-like isoform X7 [Crassostrea gigas]
Unigene0022898	976	22.8733	4.18	-2.45209	Down	0.851659	-	-	-	-	gi|762090316|ref|XP_011427534.1|/1.96254e-36/PREDICTED: uncharacterized protein LOC105328379 [Crassostrea gigas]
Unigene0030738	1387	56.6267	14.67	-1.94861	Down	0.851616	-	-	-	-	gi|762112061|ref|XP_011438758.1|/6.01136e-94/PREDICTED: uncharacterized protein LOC105336229 [Crassostrea gigas]
Unigene0000091	213	387.9	122.12	-1.66739	Down	0.851145	-	-	-	-	gi|762152061|ref|XP_011414029.1|/2.38598e-20/PREDICTED: uncharacterized protein LOC105318535 isoform X6 [Crassostrea gigas]
Unigene0018341	1597	35.4867	8.38667	-2.08111	Down	0.850919	-	-	-	-	-
Unigene0017956	1677	20.6967	3.48333	-2.57086	Down	0.850871	-	-	-	-	gi|762071747|ref|XP_011426715.1|/2.89697e-64/PREDICTED: uncharacterized protein LOC105327780 isoform X2 [Crassostrea gigas]
Unigene0001245	1580	181.093	55.18	-1.71452	Down	0.850652	K05728|1|5e-156|553|crg:105320463|c-src tyrosine kinase [EC:2.7.10.2]	-	-	-	gi|762157117|ref|XP_011416705.1|/4.28201e-155/PREDICTED: tyrosine-protein kinase CSK-like isoform X5 [Crassostrea gigas]
Unigene0025154	780	27.9967	5.81	-2.26864	Down	0.850469	-	-	-	-	gi|762107360|ref|XP_011436280.1|/2.27767e-81/PREDICTED: uncharacterized protein LOC105334499 [Crassostrea gigas]
Unigene0005101	569	34.98	8.25333	-2.08348	Down	0.850384	-	-	GO:0003824//catalytic activity	-	gi|762136621|ref|XP_011451591.1|/2.14732e-98/PREDICTED: apoptosis-resistant E3 ubiquitin protein ligase 1-like isoform X2 [Crassostrea gigas]
Unigene0004049	496	54.9467	14.34	-1.93799	Down	0.850185	K04261|1|3e-38|159|crg:105344091|prostaglandin E receptor 4	-	-	-	gi|405952363|gb|EKC20184.1|/2.2064e-37/Prostaglandin E2 receptor EP4 subtype [Crassostrea gigas]
Unigene0009418	1949	59.99	16.0633	-1.90095	Down	0.850057	-	GO:0016020//membrane	-	-	gi|762117222|ref|XP_011441461.1|/0/PREDICTED: uncharacterized protein LOC105338166 [Crassostrea gigas]
Unigene0014448	3363	34.7433	8.41	-2.04656	Down	0.848814	-	-	-	-	gi|762150947|ref|XP_011413446.1|/0/PREDICTED: uncharacterized protein LOC105318191 [Crassostrea gigas]
Unigene0024244	852	20.3	3.46333	-2.55125	Down	0.848728	-	-	-	-	gi|762144514|ref|XP_011455527.1|/3.09223e-53/PREDICTED: uncharacterized protein LOC105347960 isoform X1 [Crassostrea gigas]
Unigene0009691	1154	35.6267	8.74333	-2.0267	Down	0.848337	-	-	-	-	gi|762127400|ref|XP_011446782.1|/6.10411e-147/PREDICTED: proto-oncogene c-Fos-like [Crassostrea gigas]
Unigene0027235	638	51.4067	13.5267	-1.92615	Down	0.847946	-	-	-	-	-
Unigene0009282	2038	82.1733	23.8233	-1.7863	Down	0.847747	-	-	-	-	gi|762097168|ref|XP_011431142.1|/2.86946e-141/PREDICTED: DNA damage-regulated autophagy modulator protein 1-like [Crassostrea gigas]
Unigene0019614	1368	33.61	8.11	-2.05112	Down	0.847501	-	-	-	-	gi|405963649|gb|EKC29206.1|/4.60583e-46/hypothetical protein CGI_10015480 [Crassostrea gigas]
Unigene0001708	343	54.8833	14.84	-1.88688	Down	0.847474	-	-	-	-	gi|762112061|ref|XP_011438758.1|/2.75056e-48/PREDICTED: uncharacterized protein LOC105336229 [Crassostrea gigas]
Unigene0019963	1314	31.9667	7.51667	-2.0884	Down	0.84742	K01283|1|0.0|769|crg:105337281|peptidyl-dipeptidase A [EC:3.4.15.1]	GO:0016020//membrane	GO:0046872//metal ion binding;GO:0008237//metallopeptidase activity;GO:0008241//peptidyl-dipeptidase activity;GO:0004180//carboxypeptidase activity;GO:0008238//exopeptidase activity	GO:0006508//proteolysis;GO:0019538//protein metabolic process	gi|762114871|ref|XP_011440230.1|/0/PREDICTED: angiotensin-converting enzyme-like isoform X1 [Crassostrea gigas]
Unigene0001704	311	42.5267	10.76	-1.98269	Down	0.847276	-	-	-	-	gi|762112061|ref|XP_011438758.1|/4.48436e-43/PREDICTED: uncharacterized protein LOC105336229 [Crassostrea gigas]
Unigene0029789	486	44.59	11.4067	-1.96684	Down	0.847169	K13411|1|2e-20|100|spu:588656|dual oxidase [EC:1.6.3.1 1.11.1.-]	-	-	-	gi|405978205|gb|EKC42615.1|/5.78116e-83/Dual oxidase [Crassostrea gigas]
Unigene0031952	206	33.75	8.22667	-2.03651	Down	0.847083	-	-	-	-	-
Unigene0018370	1589	26.72	5.65333	-2.24075	Down	0.847051	-	-	-	-	gi|762140898|ref|XP_011453629.1|/0/PREDICTED: uncharacterized protein LOC105346652 isoform X2 [Crassostrea gigas]
Unigene0002297	812	31.3533	7.35333	-2.09215	Down	0.846697	K17751|1|2e-121|437|crg:105329786|myosin heavy chain 6/7;K10352|4|5e-95|349|lgi:LOTGIDRAFT_198383|myosin heavy chain	-	-	-	gi|762094064|ref|XP_011429505.1|/1.5795e-120/PREDICTED: myosin heavy chain, striated muscle-like [Crassostrea gigas]
Unigene0028716	550	27.35	5.97	-2.19574	Down	0.846451	K17256|1|1e-23|88.2|bfo:BRAFLDRAFT_165792|insulin-like growth factor-binding protein complex acid labile subunit	-	GO:0016301//kinase activity	GO:0016310//phosphorylation	gi|765557363|gb|KJE97639.1|/1.24707e-30/TKL protein kinase [Capsaspora owczarzaki ATCC 30864]
Unigene0004053	594	52.95	14.3433	-1.88425	Down	0.845958	K04261|1|6e-67|255|crg:105344091|prostaglandin E receptor 4	-	-	-	gi|405952363|gb|EKC20184.1|/4.21399e-66/Prostaglandin E2 receptor EP4 subtype [Crassostrea gigas]
Unigene0018556	1555	48.6667	12.9	-1.91556	Down	0.845872	K04560|1|3e-136|488|crg:105345283|syntaxin 1A	GO:0016021//integral component of membrane;GO:0005622//intracellular;GO:0016020//membrane;GO:0044464	GO:0005484//SNAP receptor activity	GO:0016192//vesicle-mediated transport;GO:0006886//intracellular protein transport;GO:0061025//membrane fusion;GO:0007275//multicellular organism development;GO:0051649//establishment of localization in cell;GO:0016192//vesicle-mediated transport;GO:0048856//anatomical structure development;GO:0016043//cellular component organization;GO:0001505//regulation of neurotransmitter levels;GO:0044767//s…	gi|405975709|gb|EKC40258.1|/2.15693e-135/Syntaxin-1A [Crassostrea gigas]
Unigene0019804	1338	14.4567	1.73667	-3.05734	Down	0.845786	-	-	-	-	gi|762128686|ref|XP_011447449.1|/3.76496e-53/PREDICTED: uncharacterized protein LOC105342256 [Crassostrea gigas]
Unigene0030937	469	27.3833	6.08667	-2.16957	Down	0.845063	-	-	-	-	gi|762151043|ref|XP_011413498.1|/8.53463e-50/PREDICTED: uncharacterized protein LOC105318220 isoform X2 [Crassostrea gigas]
Unigene0005732	1359	83.25	24.7733	-1.74866	Down	0.845047	-	-	-	-	gi|762110239|ref|XP_011437805.1|/4.10429e-180/PREDICTED: uncharacterized protein LOC105335550 [Crassostrea gigas]
Unigene0019772	1345	728.147	239.833	-1.6022	Down	0.844886	K01363|1|0.0|724|crg:105328916|cathepsin B [EC:3.4.22.1]	-	GO:0070011//peptidase activity, acting on L-amino acid peptides	GO:0008152//metabolic process	gi|338815385|gb|AEJ08755.1|/0/cathepsin B [Crassostrea ariakensis]
Unigene0031821	402	14.89	1.90333	-2.96774	Down	0.84442	-	-	-	-	-
Unigene0018447	1579	157.167	50.33	-1.6428	Down	0.84435	K20050|1|5e-08|62.0|bfo:BRAFLDRAFT_132336|low-density lipoprotein receptor-related protein 3/10/12;K14616|3|3e-06|56.2|sko:100369674|cubilin	-	-	-	gi|762140509|ref|XP_011453425.1|/1.02869e-124/PREDICTED: transmembrane protease serine 7-like [Crassostrea gigas]
Unigene0016138	2217	70.4033	20.5333	-1.77768	Down	0.844313	-	-	-	-	gi|762110239|ref|XP_011437805.1|/0/PREDICTED: uncharacterized protein LOC105335550 [Crassostrea gigas]
Unigene0004031	356	31.2367	7.60667	-2.0379	Down	0.844168	K04512|1|5e-57|221|crg:105341767|dishevelled associated activator of morphogenesis	-	-	-	gi|762127379|ref|XP_011446769.1|/4.62671e-56/PREDICTED: disheveled-associated activator of morphogenesis 1-like isoform X2 [Crassostrea gigas]
Unigene0026868	651	26.7567	5.95667	-2.16732	Down	0.84398	-	-	-	-	-
Unigene0019846	1326	44.88	11.8367	-1.92281	Down	0.843745	K04978|1|0.0|854|crg:105333748|transient receptor potential cation channel subfamily M member 3	-	-	-	gi|762105285|ref|XP_011435205.1|/0/PREDICTED: transient receptor potential cation channel subfamily M member 1-like isoform X7 [Crassostrea gigas]
Unigene0006237	1756	39.53	10.09	-1.97002	Down	0.843712	-	-	-	-	gi|762148110|ref|XP_011411978.1|/0/PREDICTED: uncharacterized protein LOC105317127 [Crassostrea gigas]
Unigene0002835	236	30.83	7.48333	-2.04258	Down	0.843637	-	-	-	-	-
Unigene0012242	292	12.0567	1.03667	-3.53981	Down	0.843557	-	-	-	-	gi|762091290|ref|XP_011428038.1|/2.12122e-24/PREDICTED: ADAM family mig-17-like [Crassostrea gigas]
Unigene0016980	1927	29.58	7.04333	-2.07029	Down	0.84338	-	-	-	-	gi|762127404|ref|XP_011446784.1|/8.92933e-113/PREDICTED: proto-oncogene c-Fos-like [Crassostrea gigas]
Unigene0023601	909	28.27	6.55	-2.10971	Down	0.843321	-	-	-	-	-
Unigene0026504	684	56.9867	16.16	-1.8182	Down	0.843305	-	-	-	-	gi|405972228|gb|EKC37007.1|/9.21156e-83/hypothetical protein CGI_10025991 [Crassostrea gigas]
Unigene0024339	845	118.447	37.3633	-1.66454	Down	0.843145	K20478|1|3e-09|64.7|mze:101482221|golgin subfamily B member 1;K16767|3|3e-06|54.7|apla:101799665|centrosomal protein CEP112;K16469|5|7e-06|53.5|api:100166099|rootletin	-	-	-	gi|405973955|gb|EKC38639.1|/4.19571e-103/GTPase IMAP family member 4 [Crassostrea gigas]
Unigene0024444	838	19.3833	3.56667	-2.44217	Down	0.842764	K07375|1|6e-57|223|crg:105330724|tubulin beta	GO:0005737//cytoplasm;GO:0005874//microtubule;GO:0032991//macromolecular complex;GO:0015630//microtubule cytoskeleton	GO:0005200//structural constituent of cytoskeleton;GO:0005525//GTP binding;GO:0003924//GTPase activity;GO:0017111//nucleoside-triphosphatase activity;GO:0032550;GO:0005198//structural molecule activity	GO:0007017//microtubule-based process;GO:0009154//purine ribonucleotide catabolic process;GO:0044763;GO:0043623//cellular protein complex assembly	gi|762096750|ref|XP_011430920.1|/4.9544e-56/PREDICTED: tubulin beta chain-like, partial [Crassostrea gigas]
Unigene0029348	514	18.4967	3.20333	-2.52962	Down	0.842684	-	-	-	-	gi|762155402|ref|XP_011415802.1|/5.95485e-42/PREDICTED: uncharacterized protein LOC105319810 [Crassostrea gigas]
Unigene0025617	746	39.2833	10.0667	-1.96433	Down	0.842432	K02258|1|5e-07|57.0|hmg:100209451|cytochrome c oxidase assembly protein subunit 11	-	-	-	gi|762160896|ref|XP_011418663.1|/5.84919e-76/PREDICTED: uncharacterized protein LOC105321880 isoform X2 [Crassostrea gigas]
Unigene0018754	1516	13.4567	1.50667	-3.15889	Down	0.842255	-	-	-	-	gi|676478605|ref|XP_009061482.1|/9.1499e-06/hypothetical protein LOTGIDRAFT_234874 [Lottia gigantea]
Unigene0024634	824	1457.58	489.073	-1.57545	Down	0.842046	-	-	-	-	gi|405967172|gb|EKC32371.1|/5.15048e-26/Metallothionein [Crassostrea gigas]
Unigene0024724	816	45.8167	12.4133	-1.88398	Down	0.841998	K04194|1|2e-13|78.2|crg:105333205|cholecystokinin A receptor;K04294|2|2e-11|71.6|crg:105347680|lysophosphatidic acid receptor 3;K08375|3|3e-11|71.2|obi:106884242|neuropeptide FF receptor 2;K04207|4|8e-11|69.7|crg:105342895|neuropeptide Y receptor type 5;K04226|5|1e-10|69.3|xma:102224040|arginine vasopressin receptor 1A	-	-	-	gi|961094836|ref|XP_014773321.1|/1.43695e-12/PREDICTED: orexin receptor type 2-like [Octopus bimaculoides]
Unigene0029019	532	52.1167	14.6767	-1.82822	Down	0.841928	-	-	-	-	gi|762097579|ref|XP_011431363.1|/6.10079e-48/PREDICTED: uncharacterized protein LOC105331034 isoform X1 [Crassostrea gigas]
Unigene0031172	2827	104.617	33.0467	-1.66254	Down	0.84173	K04575|1|3e-10|70.5|hmg:100205079|amyotrophic lateral sclerosis 2 protein;K17638|2|3e-07|60.5|xtr:100495483|Ras and Rab interactor 1;K20131|3|9e-06|55.5|spu:582351|Rab5 GDP/GTP exchange factor;K20175|4|9e-06|55.5|mgp:100540550|ankyrin repeat domain-containing protein 27	-	-	-	gi|762116227|ref|XP_011440938.1|/0/PREDICTED: VPS9 domain-containing protein 1-like [Crassostrea gigas]
Unigene0028223	577	19.0233	3.5	-2.44234	Down	0.841521	-	-	-	-	gi|762165481|ref|XP_011421065.1|/5.489e-81/PREDICTED: uncharacterized protein LOC105323689 [Crassostrea gigas]
Unigene0006079	3313	12.8367	1.4	-3.19677	Down	0.840953	K02678|1|0.0|695|crg:105334546|C-ets	-	-	-	gi|762107487|ref|XP_011436349.1|/0/PREDICTED: transforming protein p54/c-ets-1-like isoform X1 [Crassostrea gigas]
Unigene0005212	734	27.6067	6.53	-2.07986	Down	0.84076	K06095|1|4e-09|63.9|cin:100186631|multiple PDZ domain protein;K02374|3|5e-08|60.1|mmu:19249|tyrosine-protein phosphatase non-receptor type 13;K06092|5|2e-07|58.5|ola:101159090|InaD-like protein	-	-	-	gi|762113550|ref|XP_011439536.1|/2.43927e-87/PREDICTED: PDZ domain-containing protein 2-like isoform X6 [Crassostrea gigas]
Unigene0016834	1977	23.35	4.96333	-2.23404	Down	0.840669	-	-	-	-	gi|762130620|ref|XP_011448451.1|/5.98781e-112/PREDICTED: transmembrane protein 179-like isoform X1 [Crassostrea gigas]
Unigene0020617	1229	25.6133	5.80333	-2.14194	Down	0.84054	K04194|1|3e-21|105|crg:105320808|cholecystokinin A receptor;K04207|2|3e-20|102|crg:105342895|neuropeptide Y receptor type 5	-	-	-	gi|762126581|ref|XP_011446351.1|/6.11352e-23/PREDICTED: cholecystokinin receptor-like [Crassostrea gigas]
Unigene0014808	2994	23.4767	5.02333	-2.22451	Down	0.840497	-	-	-	-	gi|762091079|ref|XP_011427927.1|/0/PREDICTED: uncharacterized protein LOC105328656 [Crassostrea gigas]
Unigene0008592	2463	81.87	25.41	-1.68794	Down	0.840213	K00871|1|5e-161|570|crg:105317472|phosphorylase kinase gamma subunit [EC:2.7.11.19]	-	GO:0004674//protein serine/threonine kinase activity;GO:0000166//nucleotide binding	GO:0044238//primary metabolic process;GO:0044260;GO:0016310//phosphorylation	gi|762148989|ref|XP_011412420.1|/4.52523e-160/PREDICTED: phosphorylase b kinase gamma catalytic chain, liver/testis isoform-like isoform X3 [Crassostrea gigas]
Unigene0006371	398	25.5033	5.81	-2.13408	Down	0.839817	K19028|1|6e-66|250|crg:105345856|6-phosphofructo-2-kinase / fructose-2,6-biphosphatase 1 [EC:2.7.1.105 3.1.3.46];K19029|2|4e-45|181|api:100162819|6-phosphofructo-2-kinase / fructose-2,6-biphosphatase 2 [EC:2.7.1.105 3.1.3.46]	-	-	-	gi|762138325|ref|XP_011452479.1|/1.7533e-71/PREDICTED: 6-phosphofructo-2-kinase/fructose-2,6-bisphosphatase-like isoform X3 [Crassostrea gigas]
Unigene0006126	1003	72.4933	22.1033	-1.71358	Down	0.83979	-	-	-	-	-
Unigene0025770	735	27.8	6.71	-2.0507	Down	0.839726	K11416|1|2e-101|370|crg:105347149|mono-ADP-ribosyltransferase sirtuin 6 [EC:2.4.2.31]	-	-	-	gi|405956990|gb|EKC23229.1|/1.9238e-100/NAD-dependent deacetylase sirtuin-6 [Crassostrea gigas]
Unigene0003817	728	23.2633	5.04333	-2.20561	Down	0.839554	K04630|1|4e-11|70.5|crg:105342518|guanine nucleotide-binding protein G(i) subunit alpha	-	-	-	gi|405960102|gb|EKC26049.1|/3.53228e-15/Guanine nucleotide-binding protein G(i) subunit alpha [Crassostrea gigas]
Unigene0017481	1791	23.9067	5.29	-2.17607	Down	0.839544	K12307|1|0.0|787|crg:105332893|MFS transporter, ceroid-lipofuscinosis neuronal protein 7	-	-	-	gi|762102851|ref|XP_011433930.1|/0/PREDICTED: major facilitator superfamily domain-containing protein 8-like isoform X1 [Crassostrea gigas]
Unigene0030972	767	59.2233	17.46	-1.76211	Down	0.839303	-	-	-	-	-
Unigene0026509	669	26.16	6.14667	-2.08949	Down	0.838869	K06643|1|1e-63|244|crg:105324709|E3 ubiquitin-protein ligase Mdm2 [EC:2.3.2.27]	-	-	-	gi|762167648|ref|XP_011422161.1|/9.94286e-63/PREDICTED: E3 ubiquitin-protein ligase Mdm2-like isoform X1 [Crassostrea gigas]
Unigene0007197	1572	29.19	7.25	-2.00942	Down	0.838215	K16061|1|3e-34|149|crg:105332528|baculoviral IAP repeat-containing protein 7/8;K16060|3|6e-18|94.7|crg:105323879|baculoviral IAP repeat-containing protein 2/3	-	-	-	gi|762152836|ref|XP_011414434.1|/9.44507e-171/PREDICTED: uncharacterized serine-rich protein C215.13-like isoform X1 [Crassostrea gigas]
Unigene0003736	200	44.9367	12.6467	-1.82914	Down	0.837877	-	-	-	-	-
Unigene0019436	1395	47.5133	13.5567	-1.80933	Down	0.837738	-	-	-	-	gi|762145613|ref|XP_011456083.1|/7.46994e-68/PREDICTED: uncharacterized protein LOC105348388 isoform X1 [Crassostrea gigas]
Unigene0010747	769	23.6	5.31333	-2.1511	Down	0.837497	K18592|1|2e-88|327|crg:105346832|gamma-glutamyltranspeptidase / glutathione hydrolase / leukotriene-C4 hydrolase [EC:2.3.2.2 3.4.19.13 3.4.19.14]	-	-	-	gi|762141342|ref|XP_011453855.1|/4.718e-100/PREDICTED: gamma-glutamyltranspeptidase 1-like isoform X2 [Crassostrea gigas]
Unigene0033372	291	48.38	13.8567	-1.80383	Down	0.837175	K04512|1|9e-48|190|crg:105341767|dishevelled associated activator of morphogenesis	-	GO:0005515//protein binding	GO:0016043//cellular component organization	gi|762127379|ref|XP_011446769.1|/8.87008e-47/PREDICTED: disheveled-associated activator of morphogenesis 1-like isoform X2 [Crassostrea gigas]
Unigene0016851	1969	43.7033	12.2633	-1.83339	Down	0.837138	-	-	-	-	gi|762109224|ref|XP_011437264.1|/0/PREDICTED: uncharacterized protein LOC105335181 isoform X1 [Crassostrea gigas]
Unigene0029086	524	14.59	2.11667	-2.78511	Down	0.836934	-	-	-	-	-
Unigene0024775	813	30.67	7.74	-1.98642	Down	0.83672	K12855|1|7e-15|83.2|crg:105322503|pre-mRNA-processing factor 6;K06252|2|2e-06|55.5|dre:100149028|tenascin	-	-	-	gi|762157121|ref|XP_011416707.1|/8.89672e-55/PREDICTED: von Willebrand factor D and EGF domain-containing protein-like [Crassostrea gigas]
Unigene0022882	977	103.623	33.8967	-1.61213	Down	0.836656	-	-	-	-	-
Unigene0027982	589	78.7867	25.1167	-1.64931	Down	0.836597	-	-	-	-	-
Unigene0002702	516	11.9533	1.24333	-3.26513	Down	0.83627	-	-	-	-	-
Unigene0022337	1030	20.7567	4.32	-2.26447	Down	0.835846	-	-	-	-	gi|405951098|gb|EKC19040.1|/2.98538e-179/hypothetical protein CGI_10009834 [Crassostrea gigas]
Unigene0003737	312	35.49	9.44	-1.91055	Down	0.835761	K17751|1|8e-50|197|crg:105329634|myosin heavy chain 6/7	-	-	-	gi|762093597|ref|XP_011429258.1|/7.14282e-49/PREDICTED: paramyosin-like isoform X4 [Crassostrea gigas]
Unigene0021099	1168	48.2467	14.06	-1.77883	Down	0.835466	-	-	-	-	-
Unigene0010271	1077	58.3367	17.8733	-1.70659	Down	0.835187	-	-	-	-	gi|762096171|ref|XP_011430607.1|/3.23865e-06/PREDICTED: multiple epidermal growth factor-like domains protein 11 [Crassostrea gigas]
Unigene0023859	888	16.1933	2.79	-2.53706	Down	0.834807	-	-	-	-	-
Unigene0003226	552	67.9	21.5	-1.65907	Down	0.834668	-	-	-	-	-
Unigene0002580	3811	65.0267	20.4467	-1.66917	Down	0.8344	K06835|1|1e-136|490|obi:106874077|disintegrin and metalloproteinase domain-containing protein 12 [EC:3.4.24.-]	-	GO:0016787//hydrolase activity	-	gi|762159044|ref|XP_011417719.1|/0/PREDICTED: disintegrin and metalloproteinase domain-containing protein 12-like isoform X3 [Crassostrea gigas]
Unigene0030413	402	22.1267	4.97	-2.15447	Down	0.834394	K08464|1|2e-06|53.1|mze:101466236|G protein-coupled receptor 128	-	-	-	gi|847106971|ref|XP_012813634.1|/1.88936e-09/PREDICTED: extensin [Xenopus tropicalis]
Unigene0009722	440	69.3	22.0567	-1.65164	Down	0.834367	-	-	-	-	-
Unigene0010976	307	46.95	13.7467	-1.77204	Down	0.834035	-	-	-	-	-
Unigene0006794	324	14.26	2.14333	-2.73405	Down	0.833708	-	-	-	-	-
Unigene0013965	4182	39.1233	11.0167	-1.82834	Down	0.833703	K04512|1|0.0|780|crg:105341767|dishevelled associated activator of morphogenesis	-	-	-	gi|405958456|gb|EKC24583.1|/0/Disheveled-associated activator of morphogenesis 2 [Crassostrea gigas]
Unigene0004030	1053	37.6533	10.5433	-1.83645	Down	0.833205	K04512|1|0.0|687|crg:105341767|dishevelled associated activator of morphogenesis	-	GO:0003779//actin binding;GO:0017048//Rho GTPase binding	GO:0030036//actin cytoskeleton organization	gi|762127379|ref|XP_011446769.1|/0/PREDICTED: disheveled-associated activator of morphogenesis 1-like isoform X2 [Crassostrea gigas]
Unigene0029674	493	93.3633	30.7767	-1.60102	Down	0.833178	-	-	-	-	-
Unigene0018005	1669	68.0433	21.9067	-1.63508	Down	0.833103	K07912|1|5e-51|204|lgi:LOTGIDRAFT_188052|Ras-related protein Rab-24	-	GO:0036094//small molecule binding;GO:0097159//organic cyclic compound binding;GO:1901363//heterocyclic compound binding	-	gi|762128840|ref|XP_011447531.1|/6.20548e-59/PREDICTED: ras-related protein Rab-24-like [Crassostrea gigas]
Unigene0009076	367	35.2333	9.64667	-1.86884	Down	0.832803	-	-	-	-	-
Unigene0007105	374	79.0933	25.89	-1.61116	Down	0.832524	-	-	-	-	-
Unigene0003093	906	60.8933	19.2567	-1.66093	Down	0.83239	K20045|1|2e-12|75.1|aqu:100634299|intersectin	-	-	-	gi|762097328|ref|XP_011431229.1|/5.71104e-157/PREDICTED: uncharacterized protein LOC105330957 isoform X12 [Crassostrea gigas]
Unigene0018473	1572	33.4267	9.03	-1.8882	Down	0.83238	K06092|1|3e-23|112|mze:101479634|InaD-like protein	-	-	-	gi|762113548|ref|XP_011439535.1|/0/PREDICTED: PDZ domain-containing protein 2-like isoform X5 [Crassostrea gigas]
Unigene0022984	966	14.35	2.29	-2.64763	Down	0.832037	-	-	-	-	gi|405969873|gb|EKC34818.1|/7.99764e-07/hypothetical protein CGI_10022520 [Crassostrea gigas]
Unigene0006138	2100	9.71	0.676667	-3.84295	Down	0.83164	K07752|1|0.0|819|crg:105343166|carboxypeptidase D [EC:3.4.17.22];K01296|3|2e-107|392|gga:417843|carboxypeptidase M [EC:3.4.17.12]	-	-	-	gi|762131120|ref|XP_011448718.1|/0/PREDICTED: uncharacterized protein LOC105343166 [Crassostrea gigas]
Unigene0020895	1194	170.967	57.4033	-1.57451	Down	0.831297	-	-	-	-	-
Unigene0030416	389	14.1433	2.23667	-2.6607	Down	0.831281	-	-	-	-	-
Unigene0030237	439	20.68	4.63	-2.15915	Down	0.831115	-	-	-	-	gi|405970167|gb|EKC35097.1|/5.90483e-35/hypothetical protein CGI_10015113 [Crassostrea gigas]
Unigene0007423	861	31.2933	8.30333	-1.91409	Down	0.830922	K06643|1|2e-127|457|crg:105324709|E3 ubiquitin-protein ligase Mdm2 [EC:2.3.2.27]	-	-	-	gi|762167654|ref|XP_011422164.1|/1.25529e-126/PREDICTED: E3 ubiquitin-protein ligase Mdm2-like isoform X4 [Crassostrea gigas]
Unigene0020961	1186	325.663	110.97	-1.55321	Down	0.830847	K04393|1|1e-109|399|crg:105341297|cell division control protein 42	-	-	-	gi|405975345|gb|EKC39915.1|/9.01187e-109/Cdc42-like protein [Crassostrea gigas]
Unigene0010272	852	158.803	53.55	-1.56828	Down	0.83067	K13297|1|4e-62|240|crg:105323578|receptor-type tyrosine-protein phosphatase T [EC:3.1.3.48]	-	-	-	gi|405972446|gb|EKC37213.1|/4.33255e-156/Multiple epidermal growth factor-like domains 10 [Crassostrea gigas]
Unigene0019575	1370	9.77667	0.723333	-3.75661	Down	0.830017	K14616|1|5e-11|71.6|tsp:Tsp_07225|cubilin;K13046|4|1e-10|70.5|dgr:Dgri_GH18445|tolkin [EC:3.4.24.-]	-	-	-	gi|762092601|ref|XP_011428732.1|/1.33215e-129/PREDICTED: deleted in malignant brain tumors 1 protein-like [Crassostrea gigas]
Unigene0000090	991	504.817	174.71	-1.5308	Down	0.829582	-	-	-	-	gi|762152049|ref|XP_011414023.1|/1.22354e-69/PREDICTED: uncharacterized protein LOC105318535 isoform X1 [Crassostrea gigas]
Unigene0021529	1120	52.7333	16.68	-1.6606	Down	0.828795	-	-	-	-	-
Unigene0027083	648	32.2633	8.95667	-1.84886	Down	0.828221	K16196|1|5e-25|116|lcm:102363377|eukaryotic translation initiation factor 2-alpha kinase 4 [EC:2.7.11.1];K04612|2|5e-25|105|mze:101472134|calcium-sensing receptor;K05109|4|1e-24|110|pss:102457429|Eph receptor A8 [EC:2.7.10.1]	-	-	-	gi|762083762|ref|XP_011424343.1|/2.60011e-113/PREDICTED: uncharacterized protein LOC105326175 [Crassostrea gigas]
Unigene0028427	567	16.41	3.25	-2.33606	Down	0.828087	-	-	-	-	gi|762085912|ref|XP_011425273.1|/2.02495e-08/PREDICTED: mucin-17-like [Crassostrea gigas]
Unigene0001246	214	188.257	64.3967	-1.54764	Down	0.827975	K05728|1|3e-25|115|isc:IscW_ISCW002928|c-src tyrosine kinase [EC:2.7.10.2]	GO:0031234//extrinsic component of cytoplasmic side of plasma membrane	GO:0016705//oxidoreductase activity, acting on paired donors, with incorporation or reduction of molecular oxygen;GO:0004497//monooxygenase activity;GO:0005102//receptor binding;GO:0005524//ATP binding;GO:0020037//heme binding;GO:0004715//non-membrane spanning protein tyrosine kinase activity;GO:0005506//iron ion binding	GO:0016477//cell migration;GO:0055114//oxidation-reduction process;GO:0038083//peptidyl-tyrosine autophosphorylation;GO:0045087//innate immune response;GO:0007169//transmembrane receptor protein tyrosine kinase signaling pathway;GO:0030154//cell differentiation;GO:0042127//regulation of cell proliferation	gi|762157115|ref|XP_011416704.1|/3.09519e-36/PREDICTED: tyrosine-protein kinase CSK-like isoform X4 [Crassostrea gigas]
Unigene0002870	500	31.49	8.66667	-1.86134	Down	0.827798	K13912|1|9e-10|64.7|crg:105325278|deleted in malignant brain tumors 1 protein	-	-	-	gi|762109205|ref|XP_011437254.1|/4.25753e-39/PREDICTED: uncharacterized protein LOC105335173 [Crassostrea gigas]
Unigene0018043	1660	28.9833	7.73	-1.90668	Down	0.827589	-	-	-	-	gi|762092323|ref|XP_011428592.1|/3.47307e-70/PREDICTED: uncharacterized protein LOC105329121 isoform X1 [Crassostrea gigas]
Unigene0014786	3013	75.5633	25.1633	-1.58636	Down	0.827386	K06483|1|5e-86|322|crg:105328979|integrin alpha 4;K06584|3|3e-75|286|crg:105348912|integrin alpha 8;K06585|4|5e-60|235|crg:105319766|integrin alpha 9	-	-	-	gi|762133817|ref|XP_011450122.1|/0/PREDICTED: integrin alpha-PS1-like [Crassostrea gigas]
Unigene0021806	1082	13.5667	2.19333	-2.62887	Down	0.827225	-	-	-	-	gi|762138263|ref|XP_011452446.1|/1.95569e-51/PREDICTED: uncharacterized protein LOC105345827 [Crassostrea gigas]
Unigene0011495	712	19.1733	4.28667	-2.16117	Down	0.826732	K07188|1|2e-06|55.1|amj:102571969|hormone-sensitive lipase [EC:3.1.1.79]	-	-	-	gi|405975431|gb|EKC39996.1|/1.21281e-46/Cornifelin-like protein [Crassostrea gigas]
Unigene0012933	293	11.5067	1.43333	-3.00502	Down	0.826217	-	-	-	-	gi|762092104|ref|XP_011428477.1|/3.07015e-15/PREDICTED: uncharacterized protein LOC105329042 [Crassostrea gigas]
Unigene0031803	5329	210.17	72.6567	-1.53239	Down	0.826121	K17700|1|0.0|1735|crg:105345641|RAP1 GTPase activating protein 1	-	-	-	gi|762137696|ref|XP_011452143.1|/0/PREDICTED: rap1 GTPase-activating protein 1-like isoform X3 [Crassostrea gigas]
Unigene0005100	2748	37.7167	11.1833	-1.75385	Down	0.825891	K13305|1|4e-60|236|xma:102218091|E3 ubiquitin-protein ligase NEDD4-like [EC:2.3.2.26]	GO:0016021//integral component of membrane	GO:0016874//ligase activity;GO:0004842//ubiquitin-protein transferase activity	GO:0016567//protein ubiquitination	gi|762136621|ref|XP_011451591.1|/0/PREDICTED: apoptosis-resistant E3 ubiquitin protein ligase 1-like isoform X2 [Crassostrea gigas]
Unigene0007682	288	11.8233	1.54	-2.94063	Down	0.825596	K13907|1|6e-21|101|crg:105333521|cystatin-A/B	-	-	-	gi|405965724|gb|EKC31079.1|/5.43096e-20/Cystatin-A1 [Crassostrea gigas]
Unigene0004174	269	15.1767	2.87333	-2.40106	Down	0.825558	-	-	-	-	gi|918321871|gb|KOF89627.1|/5.69112e-06/hypothetical protein OCBIM_22012741mg, partial [Octopus bimaculoides]
Unigene0030397	453	13.61	2.27333	-2.58179	Down	0.825376	-	-	-	-	-
Unigene0013575	6286	37.2667	11.1033	-1.74689	Down	0.825355	K04946|1|0.0|819|phu:Phum_PHUM562900|potassium channel subfamily T member 1;K04947|5|0.0|748|acs:100565600|potassium channel subfamily T member 2	-	-	-	gi|762079958|ref|XP_011414522.1|/0/PREDICTED: potassium channel subfamily T member 2-like isoform X4 [Crassostrea gigas]
Unigene0018350	1598	46.2	14.58	-1.6639	Down	0.825253	-	-	-	-	gi|762105059|ref|XP_011435083.1|/1.22338e-169/PREDICTED: coiled-coil domain-containing protein 186-like isoform X1 [Crassostrea gigas]
Unigene0018448	1578	28.5	7.76333	-1.87621	Down	0.824937	-	-	-	-	gi|405974924|gb|EKC39536.1|/1.61249e-61/ATP-binding cassette sub-family A member 3 [Crassostrea gigas]
Unigene0012467	416	59.78	19.7667	-1.59659	Down	0.824862	K01158|1|2e-11|69.3|crg:105335719|deoxyribonuclease II [EC:3.1.22.1]	-	-	-	gi|762110719|ref|XP_011438057.1|/2.22156e-10/PREDICTED: plancitoxin-1-like isoform X1 [Crassostrea gigas]
Unigene0019807	1338	10.6733	1.17667	-3.18123	Down	0.824583	-	-	-	-	gi|405976563|gb|EKC41065.1|/3.51843e-160/hypothetical protein CGI_10024908 [Crassostrea gigas]
Unigene0022854	975	146.563	50.3633	-1.54108	Down	0.824567	K09209|1|3e-116|420|crg:105335688|krueppel-like factor 10/11	-	-	-	gi|762110647|ref|XP_011438021.1|/2.7538e-115/PREDICTED: zinc finger protein 394-like [Crassostrea gigas]
Unigene0010836	421	26.5667	7.00667	-1.92282	Down	0.824412	K18808|1|2e-70|265|crg:105336687|toll-like receptor 13;K05401|3|2e-08|59.7|crg:105331921|toll-like receptor 3;K16362|5|8e-07|54.3|cmk:103177911|leucine-rich repeat transmembrane protein FLRT	GO:0016020//membrane	-	-	gi|762113323|ref|XP_011439418.1|/1.61329e-69/PREDICTED: toll-like receptor 3 isoform X1 [Crassostrea gigas]
Unigene0024251	852	51.21	16.65	-1.6209	Down	0.82431	K12354|1|9e-06|53.1|lcm:106704261|ectonucleotide pyrophosphatase/phosphodiesterase family member 7 [EC:3.1.4.12]	-	-	-	gi|662225180|ref|XP_008486975.1|/4.31908e-10/PREDICTED: RNA-directed DNA polymerase from mobile element jockey-like, partial [Diaphorina citri]
Unigene0000102	268	50.39	16.3567	-1.62326	Down	0.823935	-	-	-	-	-
Unigene0016652	2031	25.57	6.66667	-1.93941	Down	0.823892	K07437|1|2e-11|73.6|crg:105320901|cytochrome P450, family 26, subfamily A;K15001|3|9e-10|68.2|cqu:CpipJ_CPIJ018716|cytochrome P450, family 4 [EC:1.14.-.-];K17860|4|9e-10|68.2|mze:101471241|cytochrome P450, family 3, subfamily C;K12665|5|2e-09|67.0|tru:101072612|cytochrome P450, family 26, subfamily C	-	GO:0005488	-	gi|762142675|ref|XP_011454561.1|/4.07302e-71/PREDICTED: cytochrome P450 26B1-like [Crassostrea gigas]
Unigene0002020	411	14.8533	2.84333	-2.38513	Down	0.823592	-	-	-	-	-
Unigene0005403	315	10.0267	0.96	-3.38466	Down	0.823533	-	-	-	-	-
Unigene0023470	921	52.2867	17.1567	-1.60767	Down	0.823458	-	-	-	-	gi|405970383|gb|EKC35292.1|/7.08735e-94/GTPase IMAP family member 4 [Crassostrea gigas]
Unigene0024174	861	45.8933	14.6933	-1.64312	Down	0.82341	-	-	-	-	gi|762146368|ref|XP_011456485.1|/1.50361e-79/PREDICTED: uncharacterized protein LOC105348650 [Crassostrea gigas]
Unigene0030618	1565	43.2067	13.67	-1.66024	Down	0.823335	-	-	-	-	-
Unigene0009148	1989	129.02	44.2167	-1.54493	Down	0.823335	-	GO:0016021//integral component of membrane	-	-	gi|762164497|ref|XP_011420563.1|/3.21484e-97/PREDICTED: tumor protein p53-inducible protein 11-like isoform X2 [Crassostrea gigas]
Unigene0024935	800	36	10.7867	-1.73875	Down	0.823233	K04402|1|2e-89|313|crg:105340466|growth arrest and DNA-damage-inducible protein	-	-	-	gi|762123655|ref|XP_011444814.1|/1.28086e-88/PREDICTED: growth arrest and DNA damage-inducible protein GADD45 gamma-like [Crassostrea gigas]
Unigene0017369	1816	14.49	2.70667	-2.42047	Down	0.822938	K08181|1|0.0|384|crg:105330197|MFS transporter, MCP family, solute carrier family 16 (monocarboxylic acid transporters), member 4;K08190|3|8e-33|101|lgi:LOTGIDRAFT_158919|MFS transporter, MCP family, solute carrier family 16 (monocarboxylic acid transporters), member 14;K11810|5|2e-28|129|crg:105332430|MFS transporter, MCP family, solute carrier family 16 (monocarboxylic acid transporters), membe…	GO:0016020//membrane	-	-	gi|405976153|gb|EKC40671.1|/0/Monocarboxylate transporter 5 [Crassostrea gigas]
Unigene0001247	361	191.877	67.99	-1.49678	Down	0.822579	K05728|1|5e-45|181|crg:105320463|c-src tyrosine kinase [EC:2.7.10.2]	-	-	-	gi|762157113|ref|XP_011416703.1|/5.29351e-44/PREDICTED: tyrosine-protein kinase CSK-like isoform X3 [Crassostrea gigas]
Unigene0031110	339	119.24	40.92	-1.54299	Down	0.822461	K20124|1|2e-17|89.4|crg:105327121|proline-serine-threonine phosphatase interacting protein 2	-	-	-	gi|762086902|ref|XP_011425733.1|/2.13058e-16/PREDICTED: proline-serine-threonine phosphatase-interacting protein 2-like isoform X2 [Crassostrea gigas]
Unigene0003597	1069	30.3633	8.65	-1.81156	Down	0.822418	-	-	-	-	gi|762105587|ref|XP_011435364.1|/1.34621e-90/PREDICTED: uncharacterized protein LOC105333858 isoform X1 [Crassostrea gigas]
Unigene0010413	491	58.6667	19.5133	-1.58808	Down	0.822204	K11977|1|9e-50|197|crg:105339787|E3 ubiquitin-protein ligase RNF217 [EC:2.3.2.27]	-	-	-	gi|762121749|ref|XP_011443812.1|/5.43321e-49/PREDICTED: uncharacterized protein LOC105339787 [Crassostrea gigas]
Unigene0008594	473	88.5867	29.98	-1.56309	Down	0.822043	K00871|1|2e-39|163|lgi:LOTGIDRAFT_209139|phosphorylase kinase gamma subunit [EC:2.7.11.19]	GO:0005964//phosphorylase kinase complex	GO:0004674//protein serine/threonine kinase activity;GO:0097159//organic cyclic compound binding;GO:1901363//heterocyclic compound binding;GO:0036094//small molecule binding;GO:0005516//calmodulin binding;GO:0004689//phosphorylase kinase activity;GO:0005524//ATP binding	GO:0044238//primary metabolic process;GO:0044260;GO:0006796//phosphate-containing compound metabolic process;GO:0006468//protein phosphorylation;GO:0005978//glycogen biosynthetic process	gi|762148987|ref|XP_011412419.1|/4.36194e-54/PREDICTED: phosphorylase b kinase gamma catalytic chain, skeletal muscle/heart isoform-like isoform X2 [Crassostrea gigas]
Unigene0003229	444	42.2433	13.4567	-1.6504	Down	0.821856	-	-	-	-	gi|762114150|ref|XP_011439847.1|/6.75365e-15/PREDICTED: cyclic AMP-dependent transcription factor ATF-3-like [Crassostrea gigas]
Unigene0025546	753	12.55	1.98667	-2.65927	Down	0.821631	-	-	-	-	-
Unigene0006428	2777	59.93	20.0933	-1.57656	Down	0.821566	K08878|1|2e-84|316|crg:105322891|breakpoint cluster region protein [EC:2.7.11.1]	-	GO:0030695//GTPase regulator activity	GO:0007165//signal transduction	gi|762163608|ref|XP_011420096.1|/1.77244e-83/PREDICTED: active breakpoint cluster region-related protein-like isoform X2 [Crassostrea gigas]
Unigene0019193	1435	183.733	65.4233	-1.48974	Down	0.821234	-	-	-	-	gi|762148486|ref|XP_011412165.1|/3.44712e-100/PREDICTED: uncharacterized protein LOC105317277 isoform X1 [Crassostrea gigas]
Unigene0014562	3249	43.8433	14.1467	-1.6319	Down	0.821191	K06515|1|0.0|852|crg:105319804|solute carrier family 44 (choline transporter-like protein), member 1	GO:0016020//membrane	-	-	gi|762155384|ref|XP_011415791.1|/0/PREDICTED: choline transporter-like protein 1 isoform X1 [Crassostrea gigas]
Unigene0002579	1145	36.0933	11.0333	-1.70986	Down	0.821181	-	-	-	-	-
Unigene0024034	868	8.92	0.64	-3.8009	Down	0.821138	K11265|1|3e-149|530|crg:105344201|adenylate cyclase 10 [EC:4.6.1.1]	-	-	-	gi|762133937|ref|XP_011450184.1|/2.0311e-148/PREDICTED: adenylate cyclase type 10-like isoform X2 [Crassostrea gigas]
Unigene0007102	1240	81.7233	27.7567	-1.55791	Down	0.820613	-	-	-	-	-
Unigene0013849	4497	44.3967	14.4467	-1.61971	Down	0.820532	K20168|1|0.0|1128|crg:105343202|TBC1 domain family member 15	-	-	-	gi|762131202|ref|XP_011448760.1|/0/PREDICTED: TBC1 domain family member 15-like isoform X1 [Crassostrea gigas]
Unigene0017720	1735	163.873	58.5333	-1.48525	Down	0.820312	-	-	-	-	gi|762090542|ref|XP_011427648.1|/4.09205e-162/PREDICTED: uncharacterized protein LOC105328467 [Crassostrea gigas]
Unigene0023265	934	105.677	36.6133	-1.52922	Down	0.819857	K05731|1|2e-12|51.6|crg:105331449|T-lymphoma invasion and metastasis-inducing protein 1	-	-	-	gi|762115890|ref|XP_011440760.1|/4.30281e-107/PREDICTED: protein still life, isoforms C/SIF type 2-like [Crassostrea gigas]
Unigene0006262	1478	113.523	39.4633	-1.5244	Down	0.819857	K20124|1|4e-139|497|crg:105327121|proline-serine-threonine phosphatase interacting protein 2;K12804|2|4e-36|155|lgi:LOTGIDRAFT_105043|proline-serine-threonine phosphatase interacting protein 1	-	-	-	gi|762086902|ref|XP_011425733.1|/1.49644e-138/PREDICTED: proline-serine-threonine phosphatase-interacting protein 2-like isoform X2 [Crassostrea gigas]
Unigene0004398	1154	150.66	53.7933	-1.4858	Down	0.819568	K04397|1|7e-90|333|crg:105342048|caspase 7 [EC:3.4.22.60];K02187|4|7e-55|216|lgi:LOTGIDRAFT_106792|caspase 3 [EC:3.4.22.56]	-	GO:0004197//cysteine-type endopeptidase activity;GO:0004175//endopeptidase activity	GO:0006915//apoptotic process;GO:0006508//proteolysis;GO:0012501//programmed cell death;GO:0019538//protein metabolic process	gi|762128081|ref|XP_011447134.1|/5.80679e-89/PREDICTED: caspase-7-like isoform X1 [Crassostrea gigas]
Unigene0029489	504	16.9467	3.77	-2.16837	Down	0.819568	K00698|1|2e-95|349|crg:105345033|chitin synthase [EC:2.4.1.16]	-	GO:0016757//transferase activity, transferring glycosyl groups	GO:0022610//biological adhesion	gi|762136109|ref|XP_011451318.1|/1.25266e-94/PREDICTED: uncharacterized protein LOC105345033 [Crassostrea gigas]
Unigene0019456	1392	41.2467	13.2867	-1.6343	Down	0.819273	K15825|1|4e-26|121|bmor:692634|juvenile hormone diol kinase;K05865|2|2e-06|56.6|dre:415175|troponin C, slow skeletal and cardiac muscles	-	-	-	gi|762072724|ref|XP_011431835.1|/7.76709e-142/PREDICTED: calexcitin-2-like isoform X1 [Crassostrea gigas]
Unigene0002298	5096	28.9867	8.33	-1.799	Down	0.819225	K17751|1|0.0|2229|crg:105338907|myosin heavy chain 6/7	-	-	-	gi|6682319|emb|CAB64662.1|/0/myosin heavy chain [Mytilus galloprovincialis]
Unigene0032984	1586	91.0433	31.2567	-1.54239	Down	0.818989	K05039|1|2e-11|73.2|crg:105325240|solute carrier family 6 (neurotransmitter transporter, GABA) member 6/8/11/12/13	GO:0016021//integral component of membrane;GO:0031224//intrinsic component of membrane	GO:0005328//neurotransmitter:sodium symporter activity;GO:0015291//secondary active transmembrane transporter activity;GO:0005326//neurotransmitter transporter activity	GO:0006836//neurotransmitter transport;GO:0055085//transmembrane transport;GO:0044765//single-organism transport	gi|762169225|ref|XP_011423014.1|/1.70548e-10/PREDICTED: sodium- and chloride-dependent taurine transporter-like isoform X2 [Crassostrea gigas]
Unigene0024322	846	30.46	8.92	-1.7718	Down	0.818957	-	-	-	-	gi|762155402|ref|XP_011415802.1|/4.29182e-140/PREDICTED: uncharacterized protein LOC105319810 [Crassostrea gigas]
Unigene0028929	536	113.63	39.8333	-1.5123	Down	0.818882	-	-	-	-	-
Unigene0018319	1603	21.3267	5.41	-1.97896	Down	0.818882	K00698|1|1e-155|552|crg:105341274|chitin synthase [EC:2.4.1.16]	-	-	-	gi|762125934|ref|XP_011446006.1|/9.74068e-155/PREDICTED: uncharacterized protein LOC105341274 [Crassostrea gigas]
Unigene0011267	334	13.0067	2.24	-2.53768	Down	0.818635	-	-	-	-	-
Unigene0024061	869	28.24	8.09333	-1.80293	Down	0.818207	-	-	-	-	-
Unigene0026194	709	6.17667	0.153333	-5.33209	Down	0.818078	K00432|1|2e-87|323|crg:105320326|glutathione peroxidase [EC:1.11.1.9]	-	-	-	gi|405952196|gb|EKC20036.1|/1.46564e-86/Glutathione peroxidase 3 [Crassostrea gigas]
Unigene0008703	244	141.007	50.6767	-1.47637	Down	0.817864	-	-	-	-	-
Unigene0016456	2036	530.66	197.757	-1.42406	Down	0.817799	K05053|1|4e-48|195|crg:105336252|neuromedin U receptor 2;K04284|2|4e-21|105|obi:106881650|growth hormone secretagogue receptor;K08428|3|3e-19|99.8|crg:105334744|G protein-coupled receptor 139;K04282|4|2e-18|96.7|crg:105328690|thyrotropin-releasing hormone receptor;K04305|5|2e-15|87.0|obi:106880461|Epstein-Barr virus induced gene 2	-	-	-	gi|762128464|ref|XP_011447337.1|/1.55343e-179/PREDICTED: neuromedin-U receptor 2-like [Crassostrea gigas]
Unigene0011701	1108	18.0367	4.31333	-2.06406	Down	0.817698	K15261|1|1e-156|554|crg:105334624|poly [ADP-ribose] polymerase 10/14/15 [EC:2.4.2.30]	-	-	-	gi|762073949|ref|XP_011436454.1|/1.15349e-155/PREDICTED: uncharacterized protein LOC105334624 isoform X1 [Crassostrea gigas]
Unigene0022580	1009	26.17	7.37333	-1.82753	Down	0.817633	-	-	-	-	-
Unigene0032734	960	15.54	3.27667	-2.24569	Down	0.817221	-	-	-	-	gi|405958746|gb|EKC24841.1|/1.49707e-49/hypothetical protein CGI_10010808 [Crassostrea gigas]
Unigene0012417	416	29.6333	8.77667	-1.75548	Down	0.816905	K06839|1|2e-12|73.2|dpe:Dper_GL16263|slit 2	-	GO:0005488	GO:0010631//epithelial cell migration;GO:0048812//neuron projection morphogenesis;GO:0007498//mesoderm development;GO:0048513//animal organ development;GO:0048667//cell morphogenesis involved in neuron differentiation;GO:0009790//embryo development;GO:0006935//chemotaxis;GO:0050794//regulation of cellular process;GO:0048646//anatomical structure formation involved in morphogenesis	gi|762160557|ref|XP_011418498.1|/5.43395e-33/PREDICTED: uncharacterized protein LOC105321749 [Crassostrea gigas]
Unigene0006791	2598	25.63	7.2	-1.83176	Down	0.816755	K06052|1|4e-35|152|tru:101078180|jagged	-	-	-	gi|762161221|ref|XP_011418831.1|/0/PREDICTED: neurogenic locus notch homolog protein 2-like, partial [Crassostrea gigas]
Unigene0005829	1233	17.7867	4.30667	-2.04615	Down	0.816358	-	-	-	-	-
Unigene0030068	452	18.4767	4.55	-2.02177	Down	0.816347	-	-	-	-	gi|405956099|gb|EKC22913.1|/1.49327e-14/hypothetical protein CGI_10001192 [Crassostrea gigas]
Unigene0016600	2048	19.12	4.77	-2.00302	Down	0.816026	K05941|1|0.0|936|crg:105340851|glutathione gamma-glutamylcysteinyltransferase [EC:2.3.2.15]	-	-	-	gi|762124719|ref|XP_011445377.1|/0/PREDICTED: glutathione gamma-glutamylcysteinyltransferase 2-like [Crassostrea gigas]
Unigene0004399	486	98.2933	34.7633	-1.49953	Down	0.815897	K04397|1|5e-73|274|crg:105342048|caspase 7 [EC:3.4.22.60]	-	GO:0004197//cysteine-type endopeptidase activity;GO:0004175//endopeptidase activity	GO:0006915//apoptotic process;GO:0006508//proteolysis;GO:0012501//programmed cell death;GO:0019538//protein metabolic process	gi|762128081|ref|XP_011447134.1|/3.06461e-76/PREDICTED: caspase-7-like isoform X1 [Crassostrea gigas]
Unigene0024806	808	11.72	1.85333	-2.66078	Down	0.815753	-	-	-	-	gi|762150001|ref|XP_011412950.1|/2.68403e-80/PREDICTED: uncharacterized protein LOC105317863 [Crassostrea gigas]
Unigene0024076	866	34.18	10.7267	-1.67195	Down	0.815747	-	-	-	-	gi|762122843|ref|XP_011444386.1|/4.43476e-79/PREDICTED: uncharacterized protein LOC105340167 isoform X2 [Crassostrea gigas]
Unigene0019010	1467	665.85	252.803	-1.39718	Down	0.815715	K11658|1|5e-06|55.1|obi:106870776|bromodomain adjacent to zinc finger domain protein 1B;K15174|2|9e-06|54.3|obi:106879593|RNA polymerase II-associated factor 1	GO:0016021//integral component of membrane	-	-	gi|762149025|ref|XP_011412438.1|/6.82325e-160/PREDICTED: uncharacterized protein LOC105317489 [Crassostrea gigas]
Unigene0030270	424	18.2	4.48667	-2.02022	Down	0.815249	-	-	-	-	-
Unigene0023062	955	67.8133	23.1233	-1.55222	Down	0.815201	-	-	-	-	gi|762127400|ref|XP_011446782.1|/3.36396e-09/PREDICTED: proto-oncogene c-Fos-like [Crassostrea gigas]
Unigene0015714	2421	28.8867	8.58	-1.75135	Down	0.815195	K05665|1|2e-56|223|xma:102231469|ATP-binding cassette, subfamily C (CFTR/MRP), member 1;K08029|2|2e-27|127|api:100166494|homeobox protein Nkx-2.2;K17601|3|1e-26|124|soc:105197099|WD repeat-containing protein 81;K05769|4|8e-26|121|gja:107124056|Rho guanine nucleotide exchange factor 4;K05209|5|9e-25|118|gja:107111188|glutamate receptor ionotropic, NMDA 2A	-	-	-	gi|762166442|ref|XP_011421530.1|/0/PREDICTED: uncharacterized protein K02A2.6-like [Crassostrea gigas]
Unigene0021875	1078	44.4967	14.7567	-1.59233	Down	0.814809	K14616|1|0.0|404|crg:105327358|cubilin	-	-	-	gi|762087580|ref|XP_011426084.1|/0/PREDICTED: cubilin-like [Crassostrea gigas]
Unigene0018890	1487	24.0733	6.71333	-1.84233	Down	0.814654	K14938|1|3e-173|610|crg:105340985|cholesterol 7-desaturase [EC:1.14.19.21]	-	GO:0051536//iron-sulfur cluster binding	-	gi|405970633|gb|EKC35522.1|/2.72541e-172/Chlorophyllide a oxygenase [Crassostrea gigas]
Unigene0026761	664	20.1267	5.13333	-1.97114	Down	0.814108	-	-	-	-	-
Unigene0008704	2597	198.93	74.1367	-1.424	Down	0.813786	-	-	-	-	gi|762086788|ref|XP_011425674.1|/0/PREDICTED: uncharacterized protein LOC105327076 [Crassostrea gigas]
Unigene0023604	904	16.1633	3.72	-2.11935	Down	0.813609	-	-	-	-	gi|762138775|ref|XP_011452721.1|/3.18212e-82/PREDICTED: hemicentin-1-like [Crassostrea gigas]
Unigene0012504	301	7.94333	0.506667	-3.97064	Down	0.813593	-	-	-	-	-
Unigene0009090	673	16.3733	3.81333	-2.10222	Down	0.813486	-	-	-	-	-
Unigene0014598	3203	102.64	37.1333	-1.46681	Down	0.813234	K16351|1|2e-21|107|sko:100378039|netrin-G2 ligand;K06850|3|5e-21|106|shr:100921122|slit 3;K16358|4|1e-20|104|obi:106870280|leucine-rich repeat and fibronectin type-III domain-containing protein 5	-	-	-	gi|762094294|ref|XP_011429625.1|/0/PREDICTED: leucine-rich repeat and immunoglobulin-like domain-containing nogo receptor-interacting protein 2 [Crassostrea gigas]
Unigene0030563	317	9.00667	0.846667	-3.41113	Down	0.813036	-	-	-	-	gi|762166079|ref|XP_011421354.1|/3.22147e-17/PREDICTED: uncharacterized protein LOC105323990 [Crassostrea gigas]
Unigene0009075	2024	151.787	56.1433	-1.43486	Down	0.81303	K10423|1|0.0|1231|crg:105328344|CAP-Gly domain-containing linker protein 3/4	-	-	-	gi|762090208|ref|XP_011427477.1|/0/PREDICTED: CAP-Gly domain-containing linker protein 3-like isoform X3 [Crassostrea gigas]
Unigene0000286	1723	222.07	83.74	-1.40703	Down	0.812982	K01897|1|0.0|486|crg:105332999|long-chain acyl-CoA synthetase [EC:6.2.1.3]	-	-	-	gi|762103118|ref|XP_011434072.1|/0/PREDICTED: long-chain-fatty-acid--CoA ligase 1-like isoform X1 [Crassostrea gigas]
Unigene0011702	257	15.8333	3.62	-2.1289	Down	0.812639	K15261|1|2e-38|159|crg:105334624|poly [ADP-ribose] polymerase 10/14/15 [EC:2.4.2.30]	-	-	-	gi|762073951|ref|XP_011436463.1|/1.65502e-37/PREDICTED: uncharacterized protein LOC105334624 isoform X2 [Crassostrea gigas]
Unigene0009107	1596	165.827	61.8467	-1.42291	Down	0.812468	-	-	-	-	gi|762120897|ref|XP_011443369.1|/5.56512e-102/PREDICTED: uncharacterized protein LOC105339494 isoform X3 [Crassostrea gigas]
Unigene0020136	1292	78.8767	27.8	-1.50451	Down	0.812452	K16943|1|8e-143|509|lgi:LOTGIDRAFT_238963|septin 4	-	GO:0032550	GO:0044763	gi|762159766|ref|XP_011418077.1|/0/PREDICTED: LOW QUALITY PROTEIN: uncharacterized protein LOC105321497 [Crassostrea gigas]
Unigene0019643	1359	12.3167	2.19	-2.49161	Down	0.812221	-	-	-	-	gi|762074888|ref|XP_011439379.1|/1.55442e-161/PREDICTED: uncharacterized protein LOC105336656 [Crassostrea gigas]
Unigene0008102	1677	34.8867	11.3467	-1.62041	Down	0.812178	K05741|1|3e-08|62.8|crg:105331485|diaphanous 2	-	-	-	gi|762099179|ref|XP_011432006.1|/2.74281e-14/PREDICTED: protein diaphanous homolog 2-like isoform X2 [Crassostrea gigas]
Unigene0010626	1653	14.96	3.27333	-2.19228	Down	0.812077	-	-	-	-	gi|762114553|ref|XP_011440060.1|/9.28132e-116/PREDICTED: uncharacterized protein LOC105337153 isoform X2 [Crassostrea gigas]
Unigene0018009	1669	276.383	105.123	-1.39459	Down	0.811959	K17102|1|4e-27|125|lgi:LOTGIDRAFT_172065|ETS homologous factor	-	-	-	gi|762128766|ref|XP_011447491.1|/1.34449e-154/PREDICTED: ETS-related transcription factor Elf-3-like [Crassostrea gigas]
Unigene0033030	300	18.6167	4.69	-1.98893	Down	0.8119	-	-	-	-	-
Unigene0015307	2615	23.2	6.52667	-1.82971	Down	0.81175	-	-	-	-	gi|762140141|ref|XP_011453233.1|/0/PREDICTED: uncharacterized protein LOC105346392 [Crassostrea gigas]
Unigene0015948	2299	14.0033	2.85667	-2.29337	Down	0.811728	K16910|1|2e-46|189|aqu:100633626|receptor-type tyrosine-protein phosphatase Q [EC:3.1.3.48];K06238|2|5e-28|129|obi:106875418|collagen, type VI, alpha	GO:0005576//extracellular region	GO:0008061//chitin binding	GO:0006030//chitin metabolic process	gi|405958867|gb|EKC24951.1|/0/Collagen alpha-1(XIV) chain [Crassostrea gigas]
Unigene0005468	509	123.5	45.8033	-1.43099	Down	0.810925	-	-	-	-	-
Unigene0023155	947	66.83	23.5167	-1.50681	Down	0.810271	-	-	-	-	gi|762134181|ref|XP_011450312.1|/1.95773e-110/PREDICTED: uncharacterized protein LOC105344273 [Crassostrea gigas]
Unigene0019529	1369	59.91	20.7033	-1.53293	Down	0.809864	-	-	-	-	-
Unigene0019739	1348	77.3967	27.6567	-1.48464	Down	0.809799	-	-	-	-	gi|405950055|gb|EKC18062.1|/6.2677e-56/hypothetical protein CGI_10015284 [Crassostrea gigas]
Unigene0019393	1403	265.9	103.15	-1.36614	Down	0.809365	K09435|1|0.0|788|crg:105323138|transcriptional regulator ERG	-	-	-	gi|762164211|ref|XP_011420416.1|/0/PREDICTED: transcriptional regulator Erg-like [Crassostrea gigas]
Unigene0021867	1076	74.78	26.8	-1.48042	Down	0.809205	-	-	-	-	gi|762088204|ref|XP_011426413.1|/1.52113e-80/PREDICTED: uncharacterized protein LOC105327554 [Crassostrea gigas]
Unigene0032897	2842	37.66	12.4967	-1.59149	Down	0.809167	K05039|1|2e-18|97.8|crg:105325240|solute carrier family 6 (neurotransmitter transporter, GABA) member 6/8/11/12/13	GO:0016021//integral component of membrane;GO:0031224//intrinsic component of membrane	GO:0005328//neurotransmitter:sodium symporter activity;GO:0015291//secondary active transmembrane transporter activity;GO:0005326//neurotransmitter transporter activity	GO:0006836//neurotransmitter transport;GO:0055085//transmembrane transport;GO:0044765//single-organism transport	gi|762169225|ref|XP_011423014.1|/2.68154e-18/PREDICTED: sodium- and chloride-dependent taurine transporter-like isoform X2 [Crassostrea gigas]
Unigene0004910	1023	18.5333	4.71667	-1.97428	Down	0.809135	K15259|1|4e-30|134|crg:105348951|poly [ADP-ribose] polymerase 7/11/12/13 [EC:2.4.2.30]	-	-	-	gi|405966718|gb|EKC31961.1|/2.61731e-171/Poly [ADP-ribose] polymerase 12 [Crassostrea gigas]
Unigene0008112	3707	78.63	28.4333	-1.4675	Down	0.809065	K06532|1|0.0|660|crg:105330586|prominin 1	-	-	-	gi|762096253|ref|XP_011430648.1|/0/PREDICTED: prominin-1-A-like isoform X3 [Crassostrea gigas]
Unigene0011467	222	11.0167	1.79	-2.62166	Down	0.809065	-	-	-	-	gi|762140902|ref|XP_011453631.1|/1.61159e-21/PREDICTED: uncharacterized protein LOC105346654 isoform X1 [Crassostrea gigas]
Unigene0008012	5036	413.193	162.2	-1.34904	Down	0.809006	K07997|1|0.0|748|crg:105344313|matrix metalloproteinase-17 (membrane-inserted) [EC:3.4.24.-];K00248|2|9e-145|518|crg:105344312|butyryl-CoA dehydrogenase [EC:1.3.8.1]	GO:0031012//extracellular matrix	GO:0004175//endopeptidase activity;GO:0046914//transition metal ion binding;GO:0016627//oxidoreductase activity, acting on the CH-CH group of donors;GO:0000166//nucleotide binding;GO:0050660//flavin adenine dinucleotide binding;GO:0004222//metalloendopeptidase activity;GO:0005509//calcium ion binding;GO:0003995//acyl-CoA dehydrogenase activity;GO:0008270//zinc ion binding	GO:0019538//protein metabolic process;GO:0044710;GO:0006508//proteolysis;GO:0055114//oxidation-reduction process	gi|765826414|ref|NP_001292229.1|/0/72 kDa type IV collagenase-like [Crassostrea gigas]
Unigene0013772	4787	31.2067	10.0667	-1.63227	Down	0.808637	K19483|1|5e-15|87.0|dre:100333160|neuron navigator 2 [EC:3.6.4.12]	-	-	-	gi|762144099|ref|XP_011455313.1|/0/PREDICTED: dixin-like isoform X2 [Crassostrea gigas]
Unigene0022793	987	61.4467	21.5	-1.515	Down	0.80854	-	-	-	-	-
Unigene0003573	385	32.5633	10.6567	-1.61149	Down	0.808015	K05720|1|8e-36|150|crg:105321647|FYVE, RhoGEF and PH domain containing 1	-	-	-	gi|762160218|ref|XP_011418320.1|/7.76828e-35/PREDICTED: FYVE, RhoGEF and PH domain-containing protein 4-like [Crassostrea gigas]
Unigene0007201	632	238.297	92.58	-1.36399	Down	0.807758	-	-	-	-	-
Unigene0003444	389	18.8267	4.90333	-1.94094	Down	0.807463	-	-	-	-	-
Unigene0024387	836	103.02	38.45	-1.42187	Down	0.807426	K06776|1|2e-23|110|crg:105317766|receptor-type tyrosine-protein phosphatase kappa [EC:3.1.3.48]	-	-	-	gi|405973184|gb|EKC37912.1|/1.86829e-31/hypothetical protein CGI_10018724 [Crassostrea gigas]
Unigene0027302	636	45	15.2433	-1.56175	Down	0.807018	-	-	-	-	-
Unigene0016139	2215	334.12	132.27	-1.33688	Down	0.806713	-	-	-	-	gi|762140865|ref|XP_011453614.1|/4.59785e-124/PREDICTED: uncharacterized protein LOC105346636 isoform X1 [Crassostrea gigas]
Unigene0005406	344	109.52	41.1067	-1.41375	Down	0.806713	-	-	-	-	-
Unigene0025675	741	11.7967	2.17333	-2.4404	Down	0.806606	K17495|1|1e-51|205|bfo:BRAFLDRAFT_67440|CUB and sushi domain-containing protein;K13046|3|4e-25|117|lgi:LOTGIDRAFT_172278|tolkin [EC:3.4.24.-]	-	-	-	gi|762165165|ref|XP_011420902.1|/7.6722e-113/PREDICTED: uncharacterized protein LOC105323535 [Crassostrea gigas]
Unigene0003389	292	10.9233	1.81333	-2.5907	Down	0.8066	K04349|1|1e-23|110|crg:105346952|Ras-specific guanine nucleotide-releasing factor 1	-	-	-	gi|762141741|ref|XP_011454067.1|/1.16395e-22/PREDICTED: ras-specific guanine nucleotide-releasing factor 2-like isoform X5 [Crassostrea gigas]
Unigene0025785	732	28.8167	9.22	-1.64406	Down	0.806316	K17700|1|2e-16|88.2|crg:105345641|RAP1 GTPase activating protein 1	-	-	-	gi|762137706|ref|XP_011452149.1|/3.46746e-25/PREDICTED: rap1 GTPase-activating protein 1-like isoform X8 [Crassostrea gigas]
Unigene0001442	316	71.81	26.0633	-1.46216	Down	0.806284	K05636|1|5e-06|51.6|crg:105349050|laminin, beta 1	-	-	-	gi|762124076|ref|XP_011445040.1|/1.34714e-39/PREDICTED: uncharacterized protein LOC105340598 [Crassostrea gigas]
Unigene0021020	1165	9.80333	1.35667	-2.85321	Down	0.805786	K05683|1|4e-57|224|crg:105328492|ATP-binding cassette, subfamily G (WHITE), member 5 (sterolin 1);K05684|2|2e-15|86.3|crg:105328493|ATP-binding cassette, subfamily G (WHITE), member 8 (sterolin 2)	GO:0016020//membrane	GO:0000166//nucleotide binding	-	gi|405976432|gb|EKC40938.1|/2.95722e-56/ATP-binding cassette sub-family G member 5 [Crassostrea gigas]
Unigene0004911	239	21.4333	6.1	-1.81298	Down	0.805748	-	-	-	-	gi|405966718|gb|EKC31961.1|/4.66928e-12/Poly [ADP-ribose] polymerase 12 [Crassostrea gigas]
Unigene0020280	1274	203.857	80.1567	-1.34666	Down	0.805657	K09435|1|3e-112|407|crg:105323138|transcriptional regulator ERG;K09436|4|2e-63|245|pss:102447122|friend leukemia integration 1 transcription factor	-	-	-	gi|762164211|ref|XP_011420416.1|/2.80884e-111/PREDICTED: transcriptional regulator Erg-like [Crassostrea gigas]
Unigene0027962	594	95.2567	35.78	-1.41267	Down	0.804746	K04194|1|4e-72|272|crg:105332602|cholecystokinin A receptor;K08375|2|4e-23|109|obi:106873254|neuropeptide FF receptor 2;K04239|4|4e-19|96.3|lgi:LOTGIDRAFT_171849|hypocretin (orexin) receptor 2;K04145|5|6e-19|95.9|lgi:LOTGIDRAFT_229072|dopamine receptor D2	GO:0016020//membrane	GO:0004871//signal transducer activity	GO:0007165//signal transduction	gi|405974153|gb|EKC38821.1|/2.55061e-71/Cephalotocin receptor 1 [Crassostrea gigas]
Unigene0012418	332	12.7533	2.59333	-2.29799	Down	0.804688	-	-	-	-	-
Unigene0025392	763	13.41	2.88333	-2.2175	Down	0.804682	K05088|1|9e-124|313|crg:105335797|proto-oncogene tyrosine-protein kinase ROS [EC:2.7.10.1]	-	-	-	gi|762110963|ref|XP_011438185.1|/7.34953e-123/PREDICTED: proto-oncogene tyrosine-protein kinase ROS-like isoform X1 [Crassostrea gigas]
Unigene0012244	202	9.40667	1.20667	-2.96266	Down	0.804195	-	-	-	-	-
Unigene0016316	2143	51.9867	18.25	-1.51025	Down	0.804168	K19626|1|3e-20|103|crg:105319221|inversin;K16289|4|1e-19|101|lcm:102348957|ankyrin repeat and protein kinase domain-containing protein 1 [EC:2.7.11.1]	-	-	-	gi|762160849|ref|XP_011418641.1|/7.55294e-116/PREDICTED: ankyrin repeat domain-containing protein 7-like [Crassostrea gigas]
Unigene0020112	1292	18.3733	4.89333	-1.90872	Down	0.80412	K09675|1|7e-116|419|crg:105317624|galactose-3-O-sulfotransferase 2 [EC:2.8.2.-];K09676|2|9e-25|117|crg:105338589|galactose-3-O-sulfotransferase 3 [EC:2.8.2.-];K01019|3|1e-21|106|obi:106874123|galactosylceramide sulfotransferase [EC:2.8.2.11]	-	-	-	gi|762149372|ref|XP_011412623.1|/5.58671e-115/PREDICTED: galactose-3-O-sulfotransferase 2-like [Crassostrea gigas]
Unigene0006127	268	18.0367	4.74333	-1.92696	Down	0.804071	-	-	-	-	-
Unigene0014272	3618	49.7467	17.3667	-1.51828	Down	0.803996	K09288|1|6e-39|166|crg:105334776|coiled-coil domain-containing protein 6	-	-	-	gi|762108032|ref|XP_011436636.1|/5.23164e-38/PREDICTED: coiled-coil domain-containing protein 6-like [Crassostrea gigas]
Unigene0010650	629	60.7633	21.9133	-1.47139	Down	0.803819	-	-	-	-	-
Unigene0032240	2571	79.4	29.7567	-1.41593	Down	0.803225	K19014|1|4e-06|56.6|rro:104663692|inter-alpha-trypsin inhibitor heavy chain H1	-	-	-	gi|762077487|ref|XP_011451044.1|/0/PREDICTED: uncharacterized protein LOC105344827 isoform X2 [Crassostrea gigas]
Unigene0021014	1179	92.2233	34.9867	-1.39833	Down	0.80316	K18808|1|0.0|656|crg:105325742|toll-like receptor 13	GO:0016021//integral component of membrane	-	GO:0007165//signal transduction	gi|821595429|ref|NP_001295828.1|/0/toll-like receptor 4 precursor [Crassostrea gigas]
Unigene0022467	1016	27.5133	8.97	-1.61695	Down	0.802282	-	-	-	-	gi|762080850|ref|XP_011419251.1|/5.65612e-45/PREDICTED: uncharacterized protein LOC105322306 [Crassostrea gigas]
Unigene0001972	887	12.7533	2.66333	-2.25957	Down	0.802191	-	-	-	-	gi|762157784|ref|XP_011417055.1|/5.17165e-22/PREDICTED: nucleolysin TIAR-like isoform X6 [Crassostrea gigas]
Unigene0006427	3602	56.9867	20.5567	-1.47102	Down	0.802142	K08878|1|0.0|2112|crg:105322891|breakpoint cluster region protein [EC:2.7.11.1]	-	-	-	gi|762163608|ref|XP_011420096.1|/0/PREDICTED: active breakpoint cluster region-related protein-like isoform X2 [Crassostrea gigas]
Unigene0008719	2285	43.8433	15.1467	-1.53336	Down	0.801424	K18470|1|9e-24|114|dre:550478|Rho GTPase-activating protein 1;K07526|2|3e-23|113|tad:TRIADDRAFT_55451|SLIT-ROBO Rho GTPase activating protein;K20315|3|5e-23|112|dre:562244|Rho GTPase-activating protein 21/23;K08878|5|2e-22|110|nve:NEMVE_v1g239294|breakpoint cluster region protein [EC:2.7.11.1]	-	-	-	gi|762118925|ref|XP_011442360.1|/0/PREDICTED: rho GTPase-activating protein 24-like isoform X1 [Crassostrea gigas]
Unigene0006407	1928	27.7133	9.08	-1.60982	Down	0.801178	K10392|1|0.0|766|crg:105320544|kinesin family member 1	-	-	-	gi|762157335|ref|XP_011416818.1|/0/PREDICTED: kinesin-like protein unc-104 isoform X8 [Crassostrea gigas]
Unigene0005469	2011	39.95	13.5967	-1.55494	Down	0.80113	-	-	-	-	gi|762072456|ref|XP_011430447.1|/6.46731e-146/PREDICTED: suppressor protein SRP40-like isoform X1 [Crassostrea gigas]
Unigene0003115	514	25.4767	8.19667	-1.63607	Down	0.800862	K06776|1|3e-33|142|crg:105346217|receptor-type tyrosine-protein phosphatase kappa [EC:3.1.3.48]	-	-	-	gi|762139338|ref|XP_011453015.1|/1.87205e-32/PREDICTED: receptor-type tyrosine-protein phosphatase epsilon-like [Crassostrea gigas]
Unigene0000308	281	21.25	6.27333	-1.76016	Down	0.800856	-	-	-	-	-
Unigene0024741	809	21.4167	6.35	-1.75391	Down	0.80061	-	-	-	-	-
Unigene0002525	1366	10.88	1.97	-2.46541	Down	0.800004	-	-	-	-	gi|762125146|ref|XP_011445590.1|/1.61033e-62/PREDICTED: uncharacterized protein LOC105341012 [Crassostrea gigas]
